# Supplementary material
Source: publisher figshare collection journal article supplement (https://gsajournals.figshare.com/articles/dataset/_/9820682)
Supplement: Supplementary file 1 [file 1]

## Sheet: HTSeq
Symbols	Amos_S1	Amos_S2	Amos_S3	CS_S1	CS_S2	CS_S3
128up	652	559	626	912	759	939
14-3-3epsilon	11091	10128	21100	17311	14143	17858
14-3-3zeta	24731	22958	25188	33542	27698	34242
140up	347	301	329	413	359	455
18SrRNA-Psi:CR41602	1	3	5	0	4	4
18SrRNA-Psi:CR45861	0	0	0	0	0	0
18SrRNA:CR41548	0	0	0	0	0	0
18SrRNA:CR45838	0	0	0	0	0	0
18SrRNA:CR45841	0	0	0	0	0	0
18w	1052	745	955	723	522	750
26-29-p	3007	2468	3039	3069	2801	3498
28SrRNA-Psi:CR40596	3	4	6	7	5	5
28SrRNA-Psi:CR40741	8	6	10	4	5	6
28SrRNA-Psi:CR41609	1	0	2	0	1	0
28SrRNA-Psi:CR45848	0	0	0	0	1	0
28SrRNA-Psi:CR45851	1	0	0	0	1	2
28SrRNA-Psi:CR45853	2	0	0	0	0	0
28SrRNA-Psi:CR45855	0	0	1	0	0	0
28SrRNA-Psi:CR45859	5	9	15	17	9	17
28SrRNA-Psi:CR45860	3	0	2	1	1	1
28SrRNA-Psi:CR45862	0	0	0	0	0	0
28SrRNA:CR45837	0	0	0	0	0	0
28SrRNA:CR45844	0	0	0	0	0	0
2SrRNA-Psi:CR40677	0	0	0	0	0	0
2SrRNA-Psi:CR45850	0	0	0	0	0	0
2SrRNA-Psi:CR45858	0	0	0	0	0	0
2SrRNA:CR45836	0	0	0	0	0	0
2SrRNA:CR45840	0	0	0	0	0	0
2SrRNA:CR45843	0	0	0	0	0	0
2SrRNA:CR45864	0	0	0	0	0	0
2mit	158	131	146	149	76	117
312	366	324	386	470	374	453
4E-T	1736	1286	3297	2210	1769	2209
4EHP	2333	2304	2706	4470	2913	4023
5-HT1A	435	363	445	333	214	267
5-HT1B	169	141	167	115	69	94
5-HT2A	200	294	319	1492	1141	1261
5-HT2B	156	146	151	856	650	879
5-HT7	138	109	109	81	68	88
5.8SrRNA-Psi:CR45849	0	0	0	0	0	0
5.8SrRNA-Psi:CR45854	0	0	0	0	2	0
5.8SrRNA-Psi:CR45857	0	0	0	0	0	0
5.8SrRNA-Psi:CR45863	0	0	0	0	0	0
5.8SrRNA:CR40454	0	0	0	0	0	0
5.8SrRNA:CR45839	0	0	0	0	0	0
5.8SrRNA:CR45842	0	0	0	0	0	0
5.8SrRNA:CR45852	0	0	0	0	0	0
5PtaseI	671	560	614	1067	819	1016
5SrRNA-Psi:CR33356	0	0	0	0	0	0
5SrRNA-Psi:CR33363	0	0	0	0	0	0
5SrRNA-Psi:CR33371	0	0	0	0	0	0
5SrRNA-Psi:CR33416	0	0	0	0	0	0
5SrRNA:CR33353	0	0	0	0	0	0
5SrRNA:CR33354	0	0	0	0	0	0
5SrRNA:CR33355	0	0	0	0	0	0
5SrRNA:CR33357	0	0	0	0	0	0
5SrRNA:CR33358	0	0	0	0	0	0
5SrRNA:CR33359	0	0	0	0	0	0
5SrRNA:CR33360	0	0	0	0	0	0
5SrRNA:CR33361	0	0	0	0	0	0
5SrRNA:CR33362	0	0	0	0	0	0
5SrRNA:CR33364	0	0	0	0	0	0
5SrRNA:CR33365	0	0	0	0	0	0
5SrRNA:CR33366	0	0	0	0	0	0
5SrRNA:CR33367	0	0	0	0	0	0
5SrRNA:CR33368	0	0	0	0	0	0
5SrRNA:CR33369	0	0	0	0	0	0
5SrRNA:CR33370	0	0	0	0	0	0
5SrRNA:CR33372	0	0	0	0	0	0
5SrRNA:CR33373	0	0	0	0	0	0
5SrRNA:CR33374	0	0	0	0	0	0
5SrRNA:CR33375	0	0	0	0	0	0
5SrRNA:CR33376	0	0	0	0	0	0
5SrRNA:CR33377	0	0	0	0	0	0
5SrRNA:CR33378	0	0	0	0	0	0
5SrRNA:CR33379	0	0	0	0	0	0
5SrRNA:CR33380	0	0	0	0	0	0
5SrRNA:CR33381	0	0	0	0	0	0
5SrRNA:CR33382	0	0	0	0	0	0
5SrRNA:CR33383	0	0	0	0	0	0
5SrRNA:CR33384	0	0	0	0	0	0
5SrRNA:CR33385	0	0	0	0	0	0
5SrRNA:CR33386	0	0	0	0	0	0
5SrRNA:CR33387	0	0	0	0	0	0
5SrRNA:CR33388	0	0	0	0	0	0
5SrRNA:CR33389	0	0	0	0	0	0
5SrRNA:CR33390	0	0	0	0	0	0
5SrRNA:CR33391	0	0	0	0	0	0
5SrRNA:CR33392	0	0	0	0	0	0
5SrRNA:CR33393	0	0	0	0	0	0
5SrRNA:CR33394	0	0	0	0	0	0
5SrRNA:CR33395	0	0	0	0	0	0
5SrRNA:CR33396	0	0	0	0	0	0
5SrRNA:CR33397	0	0	0	0	0	0
5SrRNA:CR33398	0	0	0	0	0	0
5SrRNA:CR33399	0	0	0	0	0	0
5SrRNA:CR33400	0	0	0	0	0	0
5SrRNA:CR33401	0	0	0	0	0	0
5SrRNA:CR33402	0	0	0	0	0	0
5SrRNA:CR33403	0	0	0	0	0	0
5SrRNA:CR33404	0	0	0	0	0	0
5SrRNA:CR33405	0	0	0	0	0	0
5SrRNA:CR33406	0	0	0	0	0	0
5SrRNA:CR33407	0	0	0	0	0	0
5SrRNA:CR33408	0	0	0	0	0	0
5SrRNA:CR33409	0	0	0	0	0	0
5SrRNA:CR33410	0	0	0	0	0	0
5SrRNA:CR33411	0	0	0	0	0	0
5SrRNA:CR33412	0	0	0	0	0	0
5SrRNA:CR33413	0	0	0	0	0	0
5SrRNA:CR33414	0	0	0	0	0	0
5SrRNA:CR33415	0	0	0	0	0	0
5SrRNA:CR33417	0	0	0	0	0	0
5SrRNA:CR33418	0	0	0	0	0	0
5SrRNA:CR33419	0	0	0	0	0	0
5SrRNA:CR33420	0	0	0	0	0	0
5SrRNA:CR33421	0	0	0	0	0	0
5SrRNA:CR33422	0	0	0	0	0	0
5SrRNA:CR33423	0	0	0	0	0	0
5SrRNA:CR33424	0	0	0	0	0	0
5SrRNA:CR33425	0	0	0	0	0	0
5SrRNA:CR33426	0	0	0	0	0	0
5SrRNA:CR33427	0	0	0	0	0	0
5SrRNA:CR33428	0	0	0	0	0	0
5SrRNA:CR33429	0	0	0	0	0	0
5SrRNA:CR33430	0	0	0	0	0	0
5SrRNA:CR33431	0	0	0	0	0	0
5SrRNA:CR33432	0	0	0	0	0	0
5SrRNA:CR33433	0	0	0	0	0	0
5SrRNA:CR33434	0	0	0	0	0	0
5SrRNA:CR33435	0	0	0	0	0	0
5SrRNA:CR33436	0	0	0	0	0	0
5SrRNA:CR33437	0	0	0	0	0	0
5SrRNA:CR33438	0	0	0	0	0	0
5SrRNA:CR33439	0	0	0	0	0	0
5SrRNA:CR33440	0	0	0	0	0	0
5SrRNA:CR33441	0	0	0	0	0	0
5SrRNA:CR33442	0	0	0	0	0	0
5SrRNA:CR33443	0	0	0	0	0	0
5SrRNA:CR33444	0	0	0	0	0	0
5SrRNA:CR33445	0	0	0	0	0	0
5SrRNA:CR33446	0	0	0	0	0	0
5SrRNA:CR33447	0	0	0	0	0	0
5SrRNA:CR33448	0	0	0	0	0	0
5SrRNA:CR33449	0	0	0	0	0	0
5SrRNA:CR33450	0	0	0	0	0	0
5SrRNA:CR33451	0	0	0	0	0	0
5SrRNA:CR33452	0	0	0	0	0	0
7B2	2964	2937	2817	7909	7344	8494
7SLRNA:CR32864	0	0	0	0	0	0
7SLRNA:CR42652	0	0	0	0	1	0
825-Oak	0	1	0	0	0	0
A16	562	524	564	768	679	758
AANATL2	500	362	398	308	267	312
ABCB7	1535	1334	1424	2025	1610	1970
ACC	4991	3889	4426	5664	4168	4965
ACXA	0	0	0	0	0	0
ACXB	0	0	0	0	0	0
ACXC	4	6	5	4	2	1
ACXD	1052	870	1044	744	532	827
ACXE	1	0	0	0	0	0
ADD1	790	698	1280	1127	760	971
ADPS	693	611	643	2415	1671	2239
AGBE	1459	1209	1192	1878	1558	1606
AGO1	4749	4402	7001	7047	4940	6522
AGO2	4575	3987	5055	5464	4222	5294
AGO3	79	114	1834	81	90	159
AIF	822	720	816	1085	890	1157
AIMP1	367	360	358	497	413	479
AIMP2	671	620	829	874	723	881
AIMP3	489	504	525	817	709	827
ALiX	3003	2655	4127	3890	3296	3678
AMPKalpha	3838	3296	4197	5027	3916	4677
AMPdeam	5894	4942	5556	7813	5549	7136
AOX1	9559	8442	8701	8878	7609	9329
AOX2	62	47	47	70	62	59
AOX3	15983	12238	12995	21505	18975	25042
AOX4	11668	9715	9004	10600	8666	9805
AP-1-2beta	2831	2574	3521	4419	3929	4454
AP-1gamma	2536	2379	3383	3787	2668	3385
AP-1mu	1467	1366	2597	2217	1881	2246
AP-1sigma	2215	2065	2910	3254	2787	3242
AP-2alpha	2205	1894	2291	3536	2793	3464
AP-2mu	1985	1800	1932	3143	2742	3198
AP-2sigma	822	784	920	1074	869	1018
APC10	281	278	298	358	291	337
APC4	380	276	463	467	337	396
APC7	11	16	66	17	11	18
APP-BP1	479	412	440	441	374	498
AQP	650	475	464	541	148	204
ARY	0	0	0	0	0	0
ASPP	2292	1791	2119	5482	3831	5037
ATP7	860	685	848	1036	783	939
ATP8B	2608	2175	2288	10594	7421	9996
ATPCL	5582	4792	5562	7625	6037	7529
ATPsynB	10556	9493	10934	13501	10147	12090
ATPsynC	37361	34261	41272	49434	35488	42714
ATPsynCF6	6439	5836	7706	9327	6687	8291
ATPsynCF6L	0	0	0	0	0	0
ATPsynD	6341	5992	7250	8555	6183	7549
ATPsynE	5879	5519	6934	8464	5862	7176
ATPsynF	7286	6554	7689	9537	7644	8601
ATPsynG	7472	6947	8473	10425	7892	9190
ATPsynGL	0	0	0	0	0	0
ATPsynO	8114	7307	9268	10047	7432	8869
ATPsynbeta	36808	31708	36121	51478	38688	45222
ATPsynbetaL	2	4	1	3	4	3
ATPsyndelta	4570	4299	6262	6279	4695	5561
ATPsynepsilonL	21	27	20	6	7	6
ATPsyngamma	8642	7872	9429	11265	8591	9829
ATbp	126	134	237	197	142	173
Aac11	3896	3153	4420	6093	3813	5649
Aatf	272	280	800	401	319	447
Abd-B	2	0	0	0	0	0
Abi	1231	978	1852	1702	1314	1614
Abl	1440	1174	2981	1984	1378	1777
Abp1	714	596	1724	896	752	965
Ac13E	1176	1018	1204	984	668	824
Ac3	690	724	735	1474	821	1258
Ac76E	1428	1198	1417	3278	2280	3004
Ac78C	80	53	78	150	132	143
AcCoAS	12894	10934	12224	15060	12940	14499
Acam	0	0	0	0	0	0
Ace	7644	6434	7048	7567	5450	6506
Acer	198	169	721	233	192	185
Acf	692	579	933	1132	894	1083
Ack	1220	1096	1406	1569	1223	1414
Ack-like	630	494	621	985	701	933
Acn	2914	2565	4196	4598	2802	4206
Acon	23976	18487	22205	23211	14382	18043
Acox57D-d	102	80	129	289	228	265
Acox57D-p	1090	987	1029	1820	1444	1695
Acp1	3	3	3	0	0	0
Acp24A4	2	4	3	12	6	19
Acp26Aa	0	0	0	0	0	0
Acp26Ab	0	0	0	0	0	0
Acp29AB	0	0	0	0	0	0
Acp32CD	1	0	1	2	0	0
Acp33A	0	0	0	0	1	0
Acp36DE	2	1	0	2	1	0
Acp53C14a	0	0	0	4	2	0
Acp53C14b	0	0	2	9	1	1
Acp53C14c	3	3	3	6	0	1
Acp53Ea	1	2	4	2	1	3
Acp54A1	1	1	3	4	0	1
Acp62F	2	2	1	4	0	4
Acp63F	4	1	5	2	2	2
Acp65Aa	2	5	4	0	0	1
Acp76A	0	0	0	1	0	0
Acp95EF	0	0	0	0	0	0
Acp98AB	0	0	1	2	1	1
Acph-1	303	247	1134	344	280	384
Acsl	6631	6202	6114	13163	10657	13393
Act42A	419	337	2922	524	400	488
Act57B	3395	2754	4024	3066	777	1262
Act5C	24882	20964	47695	25131	20088	24025
Act79B	12423	8668	11258	14301	2695	3368
Act87E	10223	6585	7205	6242	1884	2656
Act88F	383	165	245	325	22	23
Actbeta	861	802	806	1833	1415	1816
Actn	5321	3534	4848	5519	1797	2792
Actn3	0	1	1	0	2	1
Acyp	0	0	1	1	0	0
Acyp2	620	591	707	792	741	833
AdSL	430	402	444	403	352	386
AdSS	6816	6225	9151	7760	6155	6852
Ada	78	60	153	61	65	70
Ada1-1	21	23	47	27	33	41
Ada1-2	31	24	65	51	25	53
Ada2a	238	199	271	422	287	319
Ada2b	693	588	1744	788	614	787
Ada3	561	499	1173	691	547	683
Adam	2226	2153	2166	2812	2319	2894
AdamTS-A	1386	1230	1487	847	569	724
Adar	2591	2397	2811	3738	2193	3270
Adat1	222	222	277	346	248	339
Adck	299	214	272	396	328	374
AdenoK	1242	1083	1160	1300	1165	1405
Adf1	1112	1083	993	1427	1143	1434
Adgf-A	39	19	42	52	9	13
Adgf-A2	0	0	0	7	0	0
Adgf-B	1	0	0	0	0	0
Adgf-C	56	46	52	44	23	54
Adgf-D	65	33	53	103	85	95
Adgf-E	0	0	0	0	0	0
Adh	165	100	84	45	40	38
Adhr	0	0	0	0	0	0
Adi1	1167	949	1209	1415	1316	1518
AdipoR	4672	3992	4225	5364	4751	5743
Adk1	4058	3811	3767	16779	14842	17643
Adk2	99	118	149	164	124	147
Adk3	450	385	383	484	351	495
AdoR	20	9	7	16	12	15
Ady43A	3105	2782	3121	1426	1335	1582
Aef1	1437	1274	2537	1891	1499	1845
Afti	684	676	890	1031	771	1044
Ag5r	18	8	14	40	18	26
Ag5r2	0	0	0	7	0	0
Ahcy	852	863	951	927	802	928
AhcyL1	2719	2658	2919	3927	3375	3955
AhcyL2	519	449	383	326	241	414
Ak6	204	170	147	204	171	228
Akap200	738	653	6927	666	513	696
Akh	8	4	4	6	8	6
AkhR	61	41	41	41	40	15
Akt1	1461	1267	1454	1777	1401	1762
AlaRS	1149	1060	1250	1434	1130	1464
AlaRS-m	529	447	506	662	510	565
Alas	4358	4352	5551	4439	3213	3803
Ald	26573	25058	25905	34339	24411	27238
Aldh	17367	14635	13551	19677	17561	19996
Aldh-III	12669	10377	11229	20398	16528	20555
Alg-2	1400	1395	1592	2079	1809	2037
Alg10	364	322	299	346	301	392
Alh	1045	712	1786	1663	1148	1512
Alk	155	134	122	144	55	98
AlkB	249	225	529	262	210	294
Alp1	0	0	0	1	0	0
Alp2	0	2	11	1	3	1
Alp4	1987	1721	1704	1728	1536	1858
Alr	396	426	555	611	452	508
Als2	1212	996	1106	1721	1282	1610
Ama	0	0	0	0	0	0
Amnionless	64	62	42	72	35	72
Amph	7079	6219	6306	8240	6605	6082
Amt	25638	21462	24887	15265	15903	17879
Amun	3437	2901	8359	4723	3703	4549
Amy-d	33	11	13	407	89	27
Amy-p	58	5	7	409	148	61
Amyrel	11	4	8	21	20	26
Ance	2762	2137	2667	1887	1633	1714
Ance-2	7	9	6	4	2	3
Ance-3	5990	5183	5955	5970	5046	4843
Ance-4	7	13	11	12	24	3
Ance-5	241	100	151	123	116	95
Andorra	1	1	0	3	5	0
Ank	7573	6368	8777	9360	7226	8818
Ank2	4114	3426	3950	6799	3475	4804
Ankle2	1457	1237	2574	1695	1195	1660
Anp	1	0	0	1	1	0
Ant2	36	45	56	149	95	142
Antp	145	54	32	94	12	19
AnxB10	5690	6046	5871	8243	7516	8374
AnxB11	2140	1976	2389	3000	2519	2783
AnxB9	11638	10070	11444	10675	9374	10095
Aos1	559	476	1394	774	668	787
Apc	900	694	1094	1129	848	1019
Apc2	152	155	1477	143	120	132
ApepP	458	446	1639	568	462	563
Apf	0	0	0	0	0	0
Aplip1	1501	1304	1455	2232	1776	2250
Apoltp	95	38	96	75	94	38
Appl	12260	11973	13126	29057	22183	29113
Aprt	202	160	316	250	204	226
Aps	5731	4852	10334	5680	4564	5724
Arc1	3654	2355	4371	4711	2955	2922
Arc2	293	274	346	328	292	299
Arc42	871	899	1015	1165	949	1126
Archease	290	251	335	368	306	360
Arf102F	2328	2476	3767	3708	3161	3758
Arf51F	2012	1934	2924	2262	1848	2411
Arf79F	6632	5907	10969	8926	7188	9150
ArfGAP1	1065	1058	1786	1562	1271	1428
ArfGAP3	1196	1080	2156	1515	1230	1514
Arfip	897	844	921	1350	1130	1357
Arfrp1	459	390	727	601	515	641
ArgRS	506	421	515	579	530	574
ArgRS-m	646	485	555	536	457	537
Argk	61721	51010	55905	64608	47390	51126
Arl1	803	630	1224	968	812	1032
Arl2	295	252	320	321	264	313
Arl4	2539	2366	2309	3444	2910	3328
Arl5	506	422	1423	635	485	612
Arl6	1101	1108	1087	2065	1749	2012
Arp1	2079	2069	2234	2860	2300	2811
Arp10	853	773	1011	1019	886	953
Arp2	1214	1087	1758	1702	1191	1617
Arp3	859	789	2120	1066	806	1042
Arp5	486	389	781	822	620	903
Arp53D	0	0	0	0	0	0
Arp6	851	710	1119	1019	805	1015
Arp8	278	265	890	305	267	296
Arpc1	1998	1833	2466	2247	1836	2256
Arpc2	954	810	4008	1082	821	1062
Arpc3A	440	450	454	740	585	724
Arpc3B	33	23	25	25	16	40
Arpc4	954	986	1384	1262	1075	1227
Arpc5	646	570	802	677	589	667
Arr1	8	0	2	0	1	0
Arr2	2	1	1	1	0	4
Ars2	3045	2492	5708	3743	2768	3561
Art1	428	405	1836	502	454	498
Art2	24	9	20	12	6	11
Art3	225	221	851	313	251	280
Art4	385	331	676	401	273	430
Art6	1	1	0	0	0	0
Art7	402	347	348	399	313	397
Art8	19	13	38	14	7	14
Art9	0	0	0	0	0	0
Arv1	295	265	363	327	313	346
Asap	1692	1374	1568	3194	2138	2858
Asator	2775	2572	2857	5268	3154	4541
Asciz	202	163	199	223	199	221
Ask1	1441	1150	1296	1536	1287	1574
AsnRS	1227	1162	1207	1358	1194	1363
AsnRS-m	214	192	207	255	232	253
AsnS	448	428	1298	303	321	422
AspRS	394	408	510	341	252	297
AspRS-m	864	741	2172	1391	1219	1269
Asph	2251	1702	1978	2181	1137	1465
AstA	10	11	5	10	8	10
AstA-R1	37	50	53	35	32	36
AstA-R2	5	0	6	2	2	0
AstC	1	0	0	1	0	0
AstC-R1	7	3	7	8	0	2
AstC-R2	29	13	29	78	54	84
AstCC	0	0	0	1	0	0
Asx	1065	919	1024	1628	1085	1519
Atac1	182	167	315	204	167	247
Atac2	222	171	203	280	211	277
Atac3	331	307	286	474	374	476
Ate1	1276	1108	1869	1858	1468	1780
Atet	3497	2706	2989	7329	5272	7488
Atf-2	266	243	265	357	264	331
Atf3	1129	910	1027	1198	720	1040
Atf6	1581	1340	1733	1898	1516	1894
Atg1	1840	1612	2180	1966	1466	1817
Atg10	143	123	125	159	118	147
Atg101	1093	1036	1286	1562	1220	1505
Atg12	415	347	367	519	387	471
Atg13	808	774	961	875	694	925
Atg14	757	654	852	898	753	836
Atg16	474	381	1023	581	421	572
Atg17	1738	1383	1723	2346	1740	2242
Atg18a	1245	1067	1871	1710	1281	1580
Atg18b	1047	1030	1202	1378	1069	1356
Atg2	1310	1031	1230	1474	1074	1369
Atg3	1097	1065	1393	1284	1106	1291
Atg4a	903	776	1389	1291	1065	1270
Atg4b	683	550	739	1075	752	975
Atg5	271	260	573	410	312	377
Atg6	746	666	706	1019	836	963
Atg7	303	323	789	479	337	473
Atg8a	15132	15081	15472	17835	14607	16895
Atg8b	0	0	0	1	1	1
Atg9	711	586	654	928	647	806
Atox1	1769	1621	2072	2058	1818	2111
Atpalpha	61343	51180	61017	80050	60101	79317
AttA	716	809	620	399	416	557
AttB	789	1042	577	297	291	465
AttC	56	40	39	46	39	51
AttD	26	17	14	7	6	3
Atu	0	0	0	0	0	0
Atx-1	14	8	10	16	13	20
Atx2	3226	2577	2942	3978	3013	3855
Atxn7	443	326	1004	648	503	581
Aven	231	220	358	270	215	261
Awh	0	0	2	1	0	0
Axn	1273	1088	2569	1643	1236	1439
Axs	177	105	158	118	92	82
Axud1	727	667	2222	1009	711	938
B-H1	691	620	677	1257	977	1225
B-H2	489	399	463	895	702	904
B4	4886	4585	6746	8240	5730	6200
B52	6015	5046	9786	8027	4976	7388
B9d1	86	105	107	273	220	267
B9d2	0	0	0	0	0	0
BBS1	98	102	121	429	350	397
BBS4	1258	1046	1129	3872	2722	3502
BBS8	865	752	766	2306	1647	2147
BCAS2	290	291	731	345	338	359
BCL7-like	208	195	805	360	269	379
BEAF-32	867	705	1931	1006	896	1038
BG642163	0	0	1	0	1	1
BG642167	2	2	0	1	0	0
BG642312	0	0	0	2	3	0
BHD	236	232	254	305	261	317
BI-1	4455	3958	5294	7550	6682	8003
BOD1	1902	1718	2483	2971	1978	2750
BRWD3	1196	920	2810	1626	1215	1632
BTBD9	576	482	1590	791	590	737
Bacc	13425	12535	12947	19301	16244	20950
Bace	1	0	0	2860	0	1
Baldspot	16183	14905	14368	19024	17424	19807
Bap111	781	696	3721	1042	866	1105
Bap170	504	445	2317	874	665	897
Bap55	569	541	1220	685	604	740
Bap60	1174	1119	4028	1532	1222	1457
Bdbt	405	398	720	526	469	576
Bem46	302	257	342	320	252	298
Best1	4982	4404	4397	6471	4873	6023
Best2	3031	2521	2741	2515	2134	2663
Best3	2	2	6	4	3	2
Best4	2	1	0	1	0	0
Bet1	681	658	714	1103	870	1023
Bet3	527	462	863	724	577	649
Bet5	375	296	389	415	332	346
Bgb	705	657	1564	735	627	767
BicC	0	0	0	0	0	0
BicD	1976	1751	2958	3057	2362	2838
BigH1	13	4	726	5	2	3
Bili	506	474	488	1149	696	1067
Bin1	208	217	1000	294	275	312
Bka	208	232	609	292	236	258
Blimp-1	1925	1671	1606	2480	1873	2260
Blm	110	100	170	177	126	159
Blos1	363	367	465	491	434	474
Blos2	330	269	483	362	353	383
Blos3	254	245	311	240	195	236
Blos4	376	404	651	416	374	420
Bmcp	957	1033	1106	1280	1097	1469
BoYb	3	4	522	1	0	1
BobA	0	0	0	0	0	0
Br140	551	489	884	667	509	592
Brca2	296	230	260	365	243	309
Brd	0	0	0	0	0	0
Brd8	333	303	738	545	402	525
Bre1	818	777	2823	1087	785	996
Brf	478	394	775	535	458	495
Brms1	837	836	1103	1161	950	1170
Bro	2	0	2	3	0	0
Bruce	3478	2899	3479	5359	3689	4520
Bsg	8488	7811	9920	9784	7073	9274
Bsg25A	0	0	0	0	0	0
Bsg25D	1946	1654	2918	2397	1795	2403
BtbVII	2971	2491	2706	3611	2702	3263
BthD	15	12	779	7	3	7
Btk29A	840	686	3223	750	518	642
Btnd	3	4	2	10	2	6
BuGZ	1852	1690	2853	2951	1619	2578
Bub1	569	439	828	637	579	635
Bub3	394	335	1782	464	435	508
BubR1	93	72	1125	62	41	40
Buffy	1227	1177	1187	874	667	771
Bug22	1207	1166	1657	1375	1215	1445
Burs	2	1	0	2	0	0
Bx	923	803	833	883	607	863
Bx42	914	873	2390	1273	1011	1191
C15	99	104	91	59	70	93
C1GalTA	1430	1184	1291	1617	1206	1405
C3G	1881	1646	1646	1950	1363	1882
C901	20	21	24	13	13	11
CAH1	5405	4918	5221	6204	6031	6651
CAH2	49641	46002	53310	24843	20779	24035
CAHbeta	286	262	243	847	571	720
CAP	11739	9599	10783	13384	9169	12329
CASK	1580	1305	1612	2483	1764	2233
CBP	47	29	202	28	33	31
CCAP	25	30	47	41	23	48
CCAP-R	5	5	2	2	3	5
CCDC151	488	450	485	287	215	250
CCDC53	212	171	167	292	272	245
CCHa1	155	140	113	161	124	166
CCHa1-R	12	16	9	83	40	62
CCHa2	219	167	168	341	264	339
CCHa2-R	63	66	92	17	18	28
CCKLR-17D1	3037	2907	2464	7357	6038	6631
CCKLR-17D3	131	128	126	203	129	205
CCY	0	0	0	0	0	0
CD98hc	4016	3695	4285	4543	3627	4320
CDC45L	290	266	313	392	301	364
CDK2AP1	690	728	1712	891	700	846
CDase	920	703	653	685	405	563
CG10000	0	0	0	0	0	0
CG10005	8	3	11	12	7	8
CG10011	876	721	787	942	782	931
CG10013	0	0	13	0	0	0
CG10014	9	1	0	1	1	0
CG10019	117	99	111	112	81	107
CG10026	527	385	329	263	246	168
CG10029	0	0	0	0	0	0
CG10031	4895	4293	4510	2694	2380	2814
CG10035	120	122	125	1014	550	860
CG10038	369	296	707	460	392	424
CG10041	5	3	14	16	8	18
CG10050	3491	2946	2824	2429	2115	2587
CG10051	4	0	7	8	3	5
CG10053	155	148	235	204	170	193
CG10055	722	630	755	884	706	871
CG10062	2942	2745	3290	1808	1671	2118
CG10063	12	9	10	6	3	11
CG10064	105	119	154	66	48	62
CG10068	714	611	648	963	785	864
CG10073	19	19	16	8	10	9
CG10075	348	315	381	411	337	377
CG10077	18652	14141	20531	31029	17107	27572
CG10081	0	1	1	0	0	2
CG10082	3099	2818	3568	3347	2281	2942
CG10086	0	0	1	7	0	0
CG10089	1196	1053	1313	1131	841	1115
CG10096	0	0	0	0	0	0
CG10097	0	0	0	0	0	0
CG10098	1071	1039	1381	1395	1190	1419
CG10103	1891	1715	2452	2409	1782	2241
CG10104	0	2	0	0	0	0
CG10116	261	261	339	99	107	131
CG10126	4273	4142	4001	12899	11140	13237
CG10131	125	62	120	58	35	45
CG10132	1131	950	1064	1329	1020	1221
CG10133	219	231	199	333	271	313
CG10137	905	703	839	1386	1005	1291
CG10139	387	331	830	450	374	437
CG10140	3	0	0	1	0	0
CG10147	285	238	287	329	239	298
CG10151	252	217	229	447	355	437
CG10154	0	0	0	0	0	0
CG10163	1	0	0	1	1	2
CG10164	0	0	0	0	0	0
CG10165	496	458	514	498	375	424
CG10166	811	744	727	919	866	996
CG10168	0	0	0	2	0	0
CG10170	0	0	0	6	0	0
CG10171	392	382	578	396	351	451
CG10175	635	395	323	621	187	270
CG10177	1	1	7	1	1	2
CG10178	2748	2270	2913	2668	2578	3291
CG10182	1	1	0	3	1	0
CG10183	0	1	1	1	1	0
CG10184	105	84	90	84	65	81
CG10185	19050	16170	22922	13047	7565	11976
CG10188	666	617	756	888	656	778
CG10189	229	227	247	238	223	225
CG10194	289	227	282	327	253	324
CG10195	598	557	545	765	568	714
CG10202	0	0	0	0	0	0
CG10205	404	239	279	341	181	208
CG10208	177	165	198	191	145	182
CG10209	344	256	402	454	358	468
CG10211	160	110	133	203	121	208
CG10214	370	388	892	558	445	554
CG10217	2467	2174	3310	3461	3000	3593
CG10222	182	139	250	233	179	214
CG10226	1079	884	1130	791	796	983
CG10232	5	0	3	3	1	4
CG10237	19272	14991	15634	39192	33884	39575
CG1024	291	263	835	375	294	367
CG10252	0	0	1	1	0	0
CG10254	1000	858	1050	1435	1092	1298
CG10257	949	918	925	1653	1387	1638
CG10262	276	210	259	421	303	378
CG10264	0	1	0	1	0	0
CG10265	148	131	283	273	222	259
CG10268	390	359	573	558	457	521
CG10274	353	336	394	498	406	421
CG10280	3	3	5	1	1	0
CG10283	758	635	694	609	474	650
CG10286	375	329	341	442	395	452
CG10289	1549	1411	1397	2226	1519	2024
CG10298	21	19	11	19	14	22
CG10300	0	0	1	0	0	0
CG10301	0	1	0	0	0	0
CG10306	2599	2527	4317	3132	2712	2925
CG10307	1254	1072	1033	968	640	797
CG10311	2672	2459	2520	2423	2086	2481
CG10317	0	1	2	0	0	0
CG10321	1403	1238	1389	1666	1336	1554
CG10324	240	200	458	278	241	298
CG10326	1655	1484	2774	2099	1868	2409
CG10332	0	0	0	0	0	0
CG10333	590	554	898	900	722	846
CG10336	231	208	527	29	29	30
CG10337	206	235	235	239	219	330
CG10338	727	685	853	677	600	650
CG10339	1887	1609	1920	1262	869	1124
CG10340	963	881	838	1246	1128	1250
CG10341	323	315	717	395	277	442
CG10343	238	219	559	414	340	407
CG10344	110	106	106	168	130	175
CG10345	13761	13452	14145	11738	9436	13401
CG10347	414	366	758	486	426	495
CG10348	256	215	240	260	142	233
CG10352	50	35	33	18	12	15
CG10353	1140	902	982	1395	940	1260
CG10357	20046	18328	20016	9526	10450	10889
CG10359	245	167	225	129	88	109
CG10361	134	148	156	82	74	78
CG10362	699	626	681	1418	1118	1398
CG10365	946	788	1034	862	604	776
CG10366	410	431	452	581	392	535
CG10375	331	288	528	437	342	443
CG10376	865	804	1162	1103	909	1063
CG10383	1218	729	803	1043	717	966
CG10384	1	0	1	0	0	1
CG10395	443	442	918	486	455	525
CG10399	136	129	162	156	129	164
CG10405	7	12	29	14	11	16
CG10407	71	70	78	65	49	65
CG10413	1338	1167	2149	1519	1285	1526
CG10417	1774	1651	4565	2395	2153	2473
CG10418	255	252	439	373	281	335
CG10420	331	294	314	481	395	483
CG10424	421	417	747	510	474	515
CG10425	427	412	720	468	375	481
CG10428	292	207	553	311	243	312
CG10431	85	58	136	96	73	77
CG10433	2658	2262	2338	2176	1709	1651
CG10435	718	629	968	1031	818	1017
CG10444	1208	1144	1316	1375	1236	1317
CG10445	53	49	76	68	47	57
CG10459	1	0	1	2	0	0
CG10462	815	673	877	951	771	951
CG10463	160	133	174	171	156	170
CG10465	1994	1749	3008	2353	2138	2556
CG10466	98	93	189	134	105	125
CG10467	578	469	680	678	685	745
CG10469	146	133	132	200	165	200
CG10470	581	544	709	763	732	850
CG10472	133	119	110	213	107	141
CG10474	0	0	0	0	0	0
CG10476	0	0	0	0	0	0
CG10477	0	2	2	39	2	0
CG10479	78	81	76	195	144	206
CG10481	5	1	5	7	3	5
CG10483	290	221	255	444	366	460
CG10486	0	0	0	0	1	1
CG10492	716	596	2660	908	746	865
CG10494	148	165	168	262	165	228
CG10495	153	134	165	185	170	184
CG10505	3	3	7	13	3	3
CG10508	2850	2297	2546	5053	3422	5035
CG10510	4	1	1	13	8	13
CG10512	1139	1143	1026	1583	1191	1538
CG10513	159	214	227	265	244	147
CG10514	540	459	603	551	448	241
CG10516	210	173	191	176	154	151
CG10527	4979	4707	5007	4861	4251	4648
CG10543	1643	1312	1810	2107	1683	2015
CG10550	12159	12099	12939	22788	19755	26154
CG10553	3068	2548	2883	6674	5103	5780
CG10555	683	618	2145	863	608	785
CG10559	177	137	139	148	132	153
CG10560	7820	6368	7165	9027	6920	7391
CG10561	1110	894	869	1247	894	1064
CG10562	2942	2766	2839	2550	2148	2272
CG10565	1599	1408	3847	1909	1528	1747
CG10570	0	0	0	0	0	0
CG10576	2000	1775	2028	2553	2119	2658
CG10581	103	72	78	163	131	169
CG10584	321	295	466	350	249	285
CG10585	529	491	578	793	605	726
CG10587	0	0	0	0	0	0
CG10588	1	0	0	0	0	0
CG10589	9	1	9	3	2	13
CG10591	1	0	0	3	3	2
CG10592	1	1	1	193	0	0
CG10597	0	0	0	0	0	0
CG10598	0	0	0	0	0	0
CG10600	1497	1071	1368	2126	1578	1864
CG10602	2093	1659	2114	1835	1553	1814
CG10616	753	694	721	1503	1156	1413
CG10621	7	15	25	20	13	8
CG10623	570	502	396	537	417	508
CG10628	375	348	590	405	298	393
CG10631	1049	874	1238	1052	756	987
CG10638	1280	1318	1589	4946	4584	5570
CG10639	559	544	558	988	772	866
CG10646	288	262	444	417	324	400
CG10650	87	105	100	474	379	461
CG10651	0	4	1	0	0	0
CG10654	442	411	483	298	236	344
CG10657	59	40	42	102	86	109
CG10659	0	0	0	15	0	0
CG10660	423	369	397	453	367	430
CG10663	181	137	164	187	97	144
CG10669	248	240	267	388	284	358
CG10671	1163	1051	1177	1687	1421	1597
CG10672	2089	1967	1728	2916	2451	2907
CG10674	347	342	337	585	527	485
CG10680	2248	2032	1805	2601	2091	2517
CG10681	222	133	368	331	229	267
CG10694	1	1	1	1	3	1
CG10700	0	0	0	0	0	1
CG10702	429	346	1079	607	460	660
CG10710	51	32	42	59	21	33
CG10713	111	94	121	235	159	247
CG10721	368	403	458	543	470	526
CG10725	0	1	0	1	0	0
CG10730	9	4	9	57	21	48
CG10731	351	315	448	475	397	492
CG10734	0	1	1	0	0	1
CG10737	10741	7352	8070	19438	14407	18331
CG10738	696	569	667	299	273	394
CG1074	82	77	61	92	106	95
CG10747	1717	1592	1661	1179	975	1134
CG10748	0	0	0	0	0	0
CG10749	0	0	0	0	0	0
CG10750	0	0	5	0	0	0
CG10752	0	1	0	0	0	0
CG10754	458	394	954	523	506	615
CG10761	2	0	1	0	0	1
CG10764	6	8	5	6	6	8
CG1077	1	0	1	0	0	1
CG10778	329	334	460	419	331	421
CG10793	11	11	7	4	2	1
CG10795	392	359	408	519	451	523
CG10799	12	3	5	26	44	0
CG10801	1	1	2	2	0	1
CG10802	722	730	1244	1249	1007	1226
CG10803	656	626	786	827	513	769
CG10804	502	447	494	1177	619	976
CG10809	363	318	391	524	435	497
CG10814	0	0	1	0	0	0
CG10822	0	0	0	0	0	0
CG10827	2	1	3	3	5	2
CG10834	0	1	0	0	0	0
CG10839	0	0	0	0	0	0
CG10841	5	1	3	4	5	3
CG10845	0	0	0	0	0	0
CG10853	0	0	0	0	0	0
CG10859	2	1	3	1	0	1
CG10862	0	0	0	0	0	1
CG10863	4081	3717	4441	3342	2740	3479
CG10864	145	108	104	159	172	182
CG10866	1267	1138	1337	1210	944	1192
CG10869	9	21	14	22	16	19
CG10874	318	317	415	1314	996	1223
CG10877	15	4	51	36	8	19
CG10880	85	95	783	127	113	114
CG10887	0	0	0	0	0	0
CG10889	142	163	175	163	117	161
CG10898	478	435	469	628	551	568
CG10899	1	2	1	0	0	2
CG1090	637	573	727	746	461	739
CG10903	45	31	91	43	57	49
CG10904	309	327	547	374	330	336
CG10907	285	265	557	409	348	377
CG10909	0	0	0	0	0	0
CG10910	1	0	0	67	1	0
CG10911	0	0	0	312	0	0
CG10912	0	0	0	149	0	1
CG10914	187	171	177	250	219	246
CG10915	1532	1212	1284	2262	1631	2068
CG10916	410	434	504	629	535	594
CG10918	2	0	0	0	0	0
CG10919	0	0	0	3	1	2
CG1092	198	126	178	115	101	97
CG10920	0	0	0	0	0	0
CG10924	13	9	16	7	2	0
CG10927	40	49	171	57	30	65
CG10931	1	0	0	0	0	0
CG10932	565	535	505	545	398	536
CG10933	202	167	136	180	137	197
CG10934	0	0	0	1	0	0
CG10936	581	390	724	2328	1592	2038
CG10939	5718	4734	5291	10101	9540	10953
CG10943	1	0	1	7	1	0
CG10947	1301	1061	1242	1116	634	778
CG10948	887	771	888	1309	933	1235
CG10949	340	287	301	492	403	478
CG10950	4	2	0	9	4	10
CG10953	0	0	0	0	0	0
CG10958	338	296	300	365	271	350
CG10959	63	55	83	101	74	93
CG10960	2050	2074	1863	2632	2370	2933
CG10962	60	50	84	52	40	43
CG10969	0	0	0	0	0	0
CG10970	2	4	2	3	0	4
CG10973	498	488	657	754	635	770
CG10979	673	541	672	894	742	790
CG10984	906	822	1566	1130	870	1045
CG10993	12	9	20	16	12	16
CG10996	49	69	107	39	37	42
CG11000	169	155	192	851	448	785
CG11007	345	292	315	468	388	478
CG11018	0	0	1	0	0	0
CG11023	6	3	3	7	3	7
CG11029	12	4	3	6	7	2
CG1103	267	185	619	309	208	255
CG11030	459	464	1067	673	514	675
CG11034	469	389	695	413	415	507
CG11035	376	328	467	440	327	363
CG11037	0	0	0	0	0	0
CG11041	1220	1153	1225	767	683	774
CG11044	351	230	161	178	49	87
CG1105	1239	1125	1436	1364	908	1203
CG11050	4172	4004	5536	4898	3607	4595
CG11052	19	12	15	16	2	3
CG11060	4	2	2	2	1	2
CG11068	3	3	4	4	2	2
CG11069	215	176	182	235	168	205
CG11070	1339	1087	1266	1875	1413	1775
CG11073	9757	8168	8557	7824	6356	7769
CG11076	1408	1315	1500	2113	1809	2232
CG11077	35	42	69	61	66	75
CG11085	0	0	0	0	0	0
CG11089	280	225	308	300	339	331
CG1109	398	348	636	531	413	550
CG11095	219	171	163	290	163	264
CG11099	909	731	748	1284	1020	1265
CG11103	355	328	638	541	426	525
CG11106	0	0	0	2	0	0
CG11109	37	32	32	45	47	42
CG11110	182	192	204	248	203	252
CG11112	1	0	3	2	2	3
CG11113	1	0	2	2	0	3
CG11122	671	547	694	1161	800	966
CG11123	224	184	614	275	230	237
CG11125	392	388	469	679	460	637
CG11127	384	346	600	381	271	388
CG1113	149	165	189	136	115	128
CG11131	1	2	0	1	0	0
CG11134	228	189	414	244	201	220
CG11137	1844	1592	2559	1983	1961	2211
CG11138	1748	1461	1656	2228	1652	2146
CG11141	795	776	1428	1473	1033	1296
CG11145	0	0	1	0	0	0
CG11147	17136	12163	13968	11939	9144	13066
CG11149	0	1	1	4	0	1
CG11151	3918	3511	3909	5508	4423	5135
CG11155	3095	2894	2934	5403	3639	5042
CG11158	323	261	312	362	319	357
CG11159	4	0	3	8	10	15
CG1116	786	734	747	1052	780	987
CG11162	1	0	0	0	0	0
CG11164	74	49	1030	69	61	69
CG11168	817	647	771	722	510	679
CG11170	190	163	178	284	212	321
CG11178	405	380	407	580	460	614
CG11180	272	253	1019	288	229	298
CG11190	1120	955	1705	1554	1400	1558
CG11191	3885	3495	3459	9898	8153	10061
CG11192	1	0	0	1	0	0
CG11200	3022	2387	2581	1679	1103	1513
CG11208	983	909	873	1437	1154	1398
CG11210	1391	1095	1238	1498	1261	1515
CG11211	0	3	0	2	3	5
CG11221	133	118	132	124	71	105
CG11226	68	44	39	26	24	30
CG11227	0	0	0	0	0	0
CG11236	6	2	6	13	22	2
CG1124	591	484	609	374	442	474
CG11241	380	327	619	317	213	309
CG11247	1279	1131	1165	1380	962	1297
CG11248	480	399	897	682	499	679
CG11249	2	2	0	3	1	0
CG11251	1	0	0	0	0	0
CG11257	157	123	180	230	129	183
CG1126	865	864	813	2256	1859	2203
CG11261	114	90	185	55	63	82
CG11262	3	0	0	0	0	0
CG11263	2	0	53	1	1	3
CG11267	1329	1309	1610	1616	1345	1672
CG11269	1	0	0	1	0	0
CG11275	1241	1111	1074	1013	836	890
CG11279	409	406	361	564	518	598
CG11284	1341	1196	1324	1836	1454	1744
CG11286	0	0	1	0	0	0
CG11289	0	0	0	0	0	0
CG1129	660	553	613	849	865	973
CG11291	2	4	5	7	1	4
CG11294	0	0	0	1	0	0
CG11298	0	0	1	1	0	0
CG11300	0	0	1	1	1	2
CG11306	1250	1127	1173	1502	1358	1539
CG11307	262	235	978	311	238	297
CG11309	183	141	171	214	195	213
CG11313	0	2	0	0	1	0
CG11317	1872	1710	1889	1228	932	1255
CG11318	38	30	28	17	19	24
CG11319	780	693	756	1031	576	839
CG11321	1772	1056	1222	1402	435	623
CG11322	5	4	1	3	2	1
CG11327	2	0	2	1	0	0
CG11333	3	2	0	1	0	4
CG11334	613	555	1375	754	594	635
CG11340	2	3	2	14	0	1
CG11342	70	67	78	52	53	75
CG11345	5	1	0	0	1	0
CG11349	1	1	2	0	0	0
CG11350	3	1	1	8	0	10
CG11353	138	137	140	74	65	108
CG11356	74	60	74	183	167	232
CG11357	618	531	1976	861	578	777
CG1136	439	378	428	504	427	377
CG11360	901	1429	1197	2307	1054	1980
CG11362	18	19	19	66	41	62
CG11367	75	75	322	120	75	112
CG11368	2128	1359	604	2123	236	646
CG11369	1	0	1	0	1	0
CG1137	3	5	3	2	2	2
CG11370	4	0	0	0	0	2
CG11373	0	0	0	0	0	0
CG11374	12	17	19	13	9	18
CG11377	946	868	957	1189	1156	1335
CG11378	345	227	289	116	112	177
CG11379	0	0	0	0	0	0
CG1138	0	0	0	0	0	0
CG11380	29	28	21	32	22	35
CG11381	8	0	0	2	0	1
CG11382	4	2	300	4	0	2
CG11384	0	0	0	1	0	1
CG11388	1167	1069	1213	1366	1041	1385
CG1139	101	96	110	53	53	58
CG11391	83330	75137	79432	89710	80843	86102
CG11396	638	585	605	869	716	826
CG11398	182	153	169	170	176	185
CG11399	965	794	1112	1223	947	1218
CG11400	406	360	324	297	276	260
CG11403	143	108	156	137	122	111
CG11404	0	0	0	1	1	0
CG11406	4	10	8	2	2	1
CG11407	10138	7038	6832	24352	20404	18741
CG11409	79	62	87	60	81	95
CG11412	1021	832	1361	1317	1100	1281
CG11413	35	53	80	56	30	41
CG11414	1163	945	1226	1578	1316	1422
CG11417	295	247	897	346	274	356
CG1142	323	361	727	436	377	458
CG11425	116	61	44	373	343	362
CG11426	902	833	836	819	719	855
CG1143	2137	1878	1980	1275	753	1117
CG11436	165	154	355	239	234	286
CG11437	10	4	7	3	4	5
CG11438	363	342	384	502	563	666
CG11444	1365	1398	2882	1857	1645	1804
CG11447	399	404	403	518	431	537
CG11448	4241	3722	4494	7774	5570	6604
CG11449	5	2	6	1	1	4
CG11453	114	78	78	366	265	331
CG11454	432	354	411	645	560	605
CG11456	429	391	491	702	506	719
CG11458	0	0	0	0	0	0
CG11459	1	2	0	2	6	0
CG1146	1374	951	880	769	419	523
CG11470	1	3	0	3	1	4
CG11474	1044	953	1112	1330	1153	1292
CG11475	38	31	60	61	45	50
CG11486	3866	3403	6635	5656	3704	4939
CG11498	16	9	21	4	2	8
CG11504	587	440	1381	645	549	594
CG11505	1653	1314	1433	2872	1749	2405
CG11523	366	356	936	408	356	399
CG11529	375	469	603	286	196	494
CG11534	249	245	225	292	266	273
CG11537	2887	2510	2786	3602	2848	3602
CG11539	158	141	135	204	160	202
CG11550	7826	6945	5816	29861	27896	28967
CG11555	228	225	624	289	248	267
CG11560	236	194	541	329	264	306
CG11562	268	297	500	372	303	363
CG11563	268	235	856	351	361	355
CG11566	0	0	0	0	0	0
CG11570	0	0	0	0	0	0
CG11576	1115	954	1078	1181	895	1155
CG11577	405	386	1060	489	386	486
CG11581	0	0	1	1	0	0
CG11583	301	323	1194	481	433	534
CG11584	0	0	0	2	0	0
CG11585	0	0	0	0	0	0
CG11586	336	346	712	472	338	425
CG11588	0	0	0	0	0	0
CG11590	262	250	397	348	266	345
CG11593	1013	762	980	1489	1242	1459
CG11594	398	344	357	277	243	238
CG11596	499	417	1715	639	479	586
CG11597	130	135	141	276	176	239
CG11598	0	2	1	1	0	0
CG11600	0	0	0	0	0	0
CG11601	670	581	778	825	765	790
CG11608	0	0	0	0	0	0
CG1161	1638	1488	1813	1974	1692	1882
CG11617	162	113	98	136	71	108
CG11619	264	151	149	270	108	187
CG11626	1	1	6	16	7	8
CG11629	0	0	0	0	0	0
CG11630	1	0	2	0	1	0
CG11634	0	0	0	0	0	1
CG11635	0	1	1	4	3	7
CG11638	412	353	394	400	314	397
CG11652	650	673	1192	1125	946	1042
CG11655	1215	1000	1084	1105	1101	1050
CG11656	69	72	90	83	63	59
CG11658	2050	1774	2058	2321	1681	2120
CG11659	0	1	0	2	2	2
CG11663	0	0	0	0	0	0
CG11664	0	1	0	0	0	0
CG11665	2502	2192	2229	2647	2178	2608
CG11666	0	0	0	0	0	0
CG11668	38	26	32	15	23	14
CG11670	13	21	28	13	9	9
CG11671	26	54	29	39	17	15
CG11672	0	0	0	0	0	1
CG11674	11	11	1147	4	3	3
CG11679	251	253	402	277	234	292
CG11686	615	437	505	347	235	277
CG11693	8	3	2	3	3	3
CG11694	0	0	0	0	0	0
CG11695	514	501	504	570	464	523
CG11696	349	322	741	459	399	411
CG11697	0	0	0	0	0	1
CG11698	0	0	0	0	0	0
CG11699	121	128	107	173	109	170
CG11700	55	32	41	35	28	33
CG11703	0	0	0	0	1	1
CG11710	605	593	583	847	678	806
CG11714	0	0	0	0	0	0
CG1172	818	703	1279	1485	1231	1395
CG11722	275	268	237	336	312	355
CG11723	404	334	433	488	387	429
CG11726	0	0	0	0	0	0
CG11737	1520	1195	1496	1630	1318	1570
CG11739	373	337	472	470	403	447
CG11741	2	0	3	2	4	1
CG11752	1273	1153	1291	1968	1513	1769
CG11753	657	547	771	992	838	952
CG11755	102	113	179	139	111	177
CG11756	0	2	5	1	0	3
CG11760	34	14	13	22	5	9
CG11768	25	16	27	60	58	64
CG11771	1430	1153	2138	1493	1330	1520
CG11777	162	161	407	326	236	288
CG11779	841	747	788	1166	854	1123
CG11781	548	561	809	713	669	740
CG11786	2	2	1	1	1	3
CG11788	96	92	186	159	133	153
CG11790	1856	1739	2115	1779	1593	1882
CG11791	5536	4488	5158	7262	5443	6862
CG11796	10726	6658	3973	3713	2144	2022
CG11802	469	443	457	670	509	582
CG11807	1016	792	927	1004	791	1022
CG11808	215	166	390	283	241	324
CG11811	755	734	1557	926	781	921
CG11815	0	0	1	0	0	0
CG11816	0	0	0	0	1	0
CG11825	1074	1361	2308	1815	1336	1635
CG11828	2	1	0	4	2	3
CG11835	404	248	271	336	80	119
CG11836	152	135	160	259	173	213
CG11837	182	190	310	247	213	253
CG11839	148	121	169	205	149	191
CG11841	1057	878	1030	449	387	482
CG11842	34	25	29	21	19	18
CG11843	16	17	14	6	9	14
CG11851	320	303	268	415	371	470
CG11852	82	93	147	2351	1136	1196
CG11854	156	177	311	1073	585	748
CG11857	2048	2001	2905	3240	2552	3238
CG11858	256	258	446	435	321	424
CG11865	0	0	0	0	0	0
CG11873	1183	956	1189	1893	1230	1677
CG11876	5624	5109	6240	6675	5124	5997
CG11878	0	0	2	12	0	0
CG11880	1570	1271	2265	1821	1410	1676
CG11882	160	176	174	147	122	165
CG11883	979	750	933	1686	1300	1592
CG11885	187	155	287	253	202	244
CG11889	0	0	0	0	0	0
CG11891	0	0	0	0	0	0
CG11892	114	64	126	106	60	34
CG11893	42	59	60	94	67	76
CG11897	779	678	2490	850	726	902
CG11898	78	47	23	78	6	24
CG11899	2158	2004	1984	2195	2187	2443
CG11902	453	351	376	546	401	479
CG11905	9	3	4	4	5	5
CG11906	272	240	564	398	286	404
CG11911	0	0	0	4	0	0
CG11912	1	0	0	0	0	0
CG11920	206	180	685	257	239	250
CG11927	448	418	844	616	529	626
CG11929	0	0	0	0	0	0
CG11951	2419	1831	1691	915	847	1251
CG11961	1390	1001	1026	1279	1154	1522
CG11964	554	497	605	711	575	695
CG11966	3	1	0	1	1	2
CG11970	588	500	1522	768	623	762
CG11975	700	572	1026	876	752	849
CG11977	17	8	11	10	5	12
CG11980	676	583	1518	911	746	919
CG11982	880	746	1484	1267	974	1137
CG11983	50	53	43	84	49	58
CG11984	3589	2944	5577	4255	2979	3698
CG11985	325	366	727	547	499	608
CG11986	172	166	479	258	218	257
CG11997	1	2	1	0	0	1
CG11999	665	580	1031	998	841	1003
CG12003	72	58	57	78	29	69
CG12004	3323	2875	3054	4086	3161	3818
CG12006	780	745	1791	1530	1202	1572
CG12007	616	539	538	810	689	807
CG12009	5	3	0	0	1	2
CG12010	122	114	120	171	132	134
CG12011	6	3	8	2	5	2
CG12012	1024	943	971	936	884	1003
CG12014	142	108	107	92	69	110
CG12016	5	4	3	4	1	4
CG12017	4	4	5	1	1	0
CG12018	151	159	160	201	140	200
CG12020	1	0	0	0	3	0
CG12024	881	760	810	1003	830	935
CG12025	1750	1688	1844	2230	1712	2115
CG12034	359	362	1270	478	388	449
CG12035	5	1	1	10	5	11
CG12038	428	359	367	717	641	777
CG12054	1938	1482	2229	2420	1641	2243
CG12056	636	587	593	814	676	866
CG12057	5	3	2	6	3	4
CG12061	1	1	3	1	0	0
CG12065	3367	2853	3239	3086	2423	3163
CG12069	0	0	0	0	0	0
CG12071	659	532	635	1233	797	1199
CG12075	747	635	726	1074	873	1002
CG12078	0	0	1	1	0	0
CG1208	96	69	82	73	18	25
CG12081	493	468	1256	645	557	666
CG12084	1270	1081	1582	1534	1200	1336
CG12091	3616	3021	3194	3818	2801	3541
CG12093	1045	940	1014	1530	1232	1485
CG12096	612	531	557	851	713	869
CG12099	4779	4144	4621	6448	5016	6030
CG12104	312	281	804	549	474	546
CG12105	67	49	56	57	24	27
CG12106	182	161	319	232	193	221
CG12107	745	689	790	1024	868	1039
CG12111	4	5	1	4	1	2
CG12112	338	337	1084	526	456	533
CG12115	1	3	0	1	0	2
CG12116	46	40	51	167	234	27
CG12118	396	384	355	445	366	436
CG12121	1410	1235	2617	1725	1481	1769
CG12123	241	236	234	347	255	305
CG12126	0	0	0	0	0	0
CG12128	331	307	862	425	331	389
CG12129	396	343	1139	545	472	572
CG1213	330	295	450	166	179	162
CG12133	0	0	0	0	0	1
CG12134	180	189	598	263	224	223
CG12147	1	1	0	0	0	0
CG12155	641	510	647	701	561	750
CG12158	2652	1184	483	2316	76	710
CG12159	638	564	570	733	712	770
CG12163	5870	5008	8166	5722	4978	5686
CG12164	69	17	11	0	2	1
CG12170	757	706	697	1077	852	986
CG12171	533	516	1098	850	725	799
CG12173	358	396	393	505	424	510
CG12177	679	637	694	504	419	443
CG12179	112	80	478	144	103	114
CG1218	367	338	805	666	537	665
CG12182	142	117	175	180	130	134
CG12184	2	2	4	5	2	2
CG12194	931	798	905	1524	1183	1308
CG12200	3	3	779	9	6	4
CG12204	203	218	254	260	205	242
CG12206	8	5	6	4	3	4
CG12207	3147	2847	3262	2759	2071	2411
CG12209	2	1	2	4	0	3
CG12213	1205	1003	1830	1753	1422	1709
CG12219	446	389	790	500	386	459
CG12224	180	156	192	101	70	103
CG12229	42	18	30	54	27	42
CG12231	0	0	0	0	0	0
CG12236	627	503	531	729	546	710
CG12237	1288	1341	1851	1594	1375	1595
CG12239	0	0	0	1	4	1
CG12241	642	557	617	885	751	845
CG12253	180	163	467	224	210	201
CG12256	0	0	0	0	0	1
CG12259	232	247	411	319	284	323
CG12262	407	251	368	385	336	430
CG12263	371	280	444	355	303	409
CG12264	1499	1458	1505	2116	1597	1860
CG12267	136	138	253	180	152	163
CG12268	248	202	221	1484	1438	1120
CG1227	3099	2307	3119	935	799	1297
CG12278	3	0	2	2	0	0
CG12279	403	372	414	614	575	618
CG12288	20	22	611	44	35	42
CG12289	0	0	0	0	0	0
CG12290	3911	3462	4053	6989	5885	6166
CG12299	493	402	2103	848	658	728
CG12301	155	110	840	174	134	187
CG12307	0	1	0	0	0	0
CG12309	20	16	17	31	5	24
CG1231	35	36	51	26	12	26
CG12310	0	0	0	1	0	0
CG12316	361	294	340	450	351	430
CG12320	190	171	186	238	209	258
CG12321	1153	1136	1173	1472	1363	1644
CG12325	219	191	335	290	253	330
CG1233	788	627	680	999	804	978
CG12333	573	524	540	694	494	620
CG12338	478	389	447	460	356	422
CG1234	311	275	1029	373	313	385
CG12341	337	323	438	431	397	458
CG12343	693	649	1064	1060	962	1127
CG12344	3991	3647	3892	5997	4136	5907
CG12347	0	0	0	0	0	1
CG12355	364	414	454	346	274	429
CG1236	553	520	1006	581	543	557
CG12362	0	1	0	1	0	0
CG12374	1	2	2	13670	3	9
CG12375	839	770	783	1142	1017	1230
CG12376	0	0	1	0	0	0
CG12379	41	48	55	70	44	58
CG12384	1855	1816	1761	2409	1969	2279
CG1239	192	169	177	267	221	229
CG12391	871	771	2220	1380	1171	1388
CG12393	484	432	858	789	576	710
CG12395	1	0	0	0	0	0
CG12398	1	2	4	4	1	1
CG12402	150	136	136	187	152	155
CG12404	1077	904	978	1585	1214	1646
CG12413	167	142	176	162	166	179
CG12420	9	7	4	14	3	15
CG12426	0	0	0	0	0	0
CG12428	487	478	711	991	821	954
CG12438	0	0	0	0	0	0
CG12439	0	0	0	0	0	0
CG12446	0	0	0	0	0	0
CG12448	9	11	8	8	8	9
CG1246	19	15	18	35	5	21
CG12464	0	0	0	0	0	0
CG12470	18	9	22	51	38	40
CG12477	1	1	0	0	2	3
CG12479	0	0	0	0	0	0
CG12480	0	0	0	0	0	0
CG12481	0	0	0	0	0	0
CG12483	762	231	89	2204	1898	1820
CG12484	3113	2648	3102	2283	1936	2539
CG12490	1	0	0	3	0	4
CG12491	0	0	0	0	1	0
CG12493	2	0	1	6	0	0
CG12496	0	0	0	0	1	2
CG12498	1	1	0	0	0	0
CG12499	223	172	246	291	218	263
CG12502	7	8	4	2	2	3
CG12506	0	0	0	1	0	0
CG12507	51	81	78	74	72	95
CG12511	0	0	0	0	0	0
CG12512	464	398	465	299	265	324
CG12516	0	0	0	0	0	0
CG12517	1	0	0	0	0	0
CG12519	3	1	7	2	3	0
CG12520	87	66	65	38	41	40
CG12521	0	0	0	0	0	0
CG12522	0	0	0	0	0	0
CG12523	5	3	7	6	1	2
CG12531	280	227	254	420	244	342
CG12535	1	5	17	5	1	5
CG12538	0	0	2	1	0	1
CG12539	1	1	2	0	1	2
CG12540	0	0	0	0	0	0
CG12541	806	746	769	1056	846	1146
CG12546	0	0	0	0	0	0
CG12547	1735	1546	2420	2350	1937	2398
CG12560	158	149	188	192	123	169
CG12567	1563	1593	4493	1944	1476	1754
CG12576	2536	2178	1964	2712	2169	2687
CG12581	4090	3346	4003	4878	3660	4322
CG12589	30	25	20	4	22	26
CG12590	0	1	0	0	0	0
CG12592	1	0	1	2	5	1
CG12594	286	275	290	238	142	184
CG12605	935	828	872	1779	1103	1509
CG12607	0	0	0	0	0	0
CG12608	444	427	1015	759	541	722
CG12609	0	0	1	0	0	0
CG12617	0	0	0	0	0	1
CG12620	0	0	2	0	0	0
CG12637	0	0	0	0	0	0
CG12640	0	0	0	0	0	0
CG12643	1057	1019	900	1891	1539	2089
CG12645	1	0	0	0	0	1
CG1265	1211	966	1004	858	482	651
CG12655	1016	892	773	1044	924	964
CG12659	75	59	326	127	97	123
CG12661	0	1	0	0	0	0
CG12662	18	15	16	8	5	11
CG12672	29	29	48	238	136	218
CG12674	0	2	1	1	0	2
CG12679	0	0	0	0	0	0
CG12680	2	0	2	4	2	2
CG12682	0	0	0	0	0	0
CG12684	0	2	0	0	1	6
CG12688	0	0	2	2	0	1
CG12689	3	2	1	2	3	5
CG12691	0	0	0	0	0	0
CG12692	0	0	0	0	0	1
CG12693	16	8	11	32	32	38
CG12698	8	4	5	16	7	17
CG12699	0	0	2	3	0	0
CG12702	56	35	706	43	39	48
CG12708	3	1	2	2	0	3
CG1271	709	710	699	1101	878	1063
CG12713	76	63	538	121	79	109
CG12715	0	2	0	0	1	2
CG12716	3	2	0	0	1	1
CG12717	295	259	270	381	309	370
CG12721	11	12	224	4	2	1
CG12723	1	3	6	3	1	1
CG12725	1	2	1	0	1	0
CG12728	279	240	337	299	259	345
CG12729	0	0	0	0	0	0
CG1273	8	4	15	6	4	2
CG12730	2049	1871	1885	2409	1874	1994
CG12736	598	535	859	545	439	537
CG12744	21	14	103	12	7	11
CG12746	1727	1549	1876	2227	1839	1993
CG1275	1817	1692	2646	1496	1208	1456
CG12766	69	59	56	49	26	50
CG12768	156	140	130	112	75	102
CG12769	525	426	579	723	466	665
CG12772	595	603	597	761	566	768
CG12773	833	615	1597	938	724	908
CG12780	0	1	0	10	0	0
CG12782	0	1	1	0	0	0
CG12783	5	1	0	4	4	5
CG12784	0	0	0	0	0	0
CG12788	0	0	0	0	0	0
CG12795	370	324	386	609	449	531
CG12811	561	545	558	654	518	667
CG12814	1792	1625	1656	2694	2098	2243
CG12817	126	111	97	237	146	226
CG12818	144	105	349	229	159	202
CG12822	1394	1271	1304	1707	1210	1578
CG12824	8	4	10	6	8	10
CG12825	53	53	74	125	48	81
CG12826	0	1	0	0	0	0
CG12828	0	0	0	0	0	0
CG12831	0	0	1	1	1	1
CG12836	920	939	1110	662	560	605
CG12848	422	434	684	667	588	636
CG12849	2	4	1	8	2	6
CG12851	352	361	392	619	443	603
CG12853	8	6	4	29	11	28
CG12857	6	11	10	12	7	12
CG12860	0	0	0	2	0	0
CG12861	0	0	1	1	0	0
CG12862	0	0	0	0	0	0
CG12863	135	119	201	193	141	195
CG12866	1	0	0	2	0	0
CG12868	510	434	437	926	838	894
CG12869	78	70	94	33	28	20
CG1287	2	1	0	0	0	1
CG12877	627	486	1794	622	578	692
CG1288	1	1	0	0	0	0
CG12880	37	34	51	93	90	116
CG12883	231	209	185	358	287	366
CG12885	1320	1096	1227	3665	2742	3580
CG12895	637	557	793	945	828	1004
CG12896	2	1	3	73	60	83
CG12898	0	0	1	0	2	0
CG12902	0	0	0	0	0	0
CG12909	125	108	637	153	129	146
CG1291	531	507	772	732	616	712
CG12910	148	123	126	355	279	346
CG12911	11	13	3	362	343	401
CG12912	0	0	0	0	0	0
CG12913	213	143	178	240	156	208
CG12914	0	0	1	1	0	1
CG12917	0	2	1	7	10	14
CG12920	2	0	5	5	3	7
CG12923	41	45	42	67	54	80
CG12926	353	343	328	420	344	468
CG12929	157	141	187	171	194	194
CG12934	6	1	2	2	0	3
CG12935	177	186	259	255	190	227
CG12942	226	166	192	233	213	250
CG12945	780	692	744	777	603	718
CG12947	12	9	18	8	10	5
CG12948	321	225	269	286	261	292
CG12950	423	380	432	1002	692	942
CG12951	0	2	4	0	0	2
CG12963	5	4	8	24	4	10
CG12964	8	2	1	2	1	0
CG12970	89	80	66	2	0	1
CG12971	1	0	6	0	0	1
CG12974	84	107	94	89	53	73
CG12975	350	289	318	498	390	510
CG12983	0	0	0	0	0	0
CG12984	7	5	4	1	4	4
CG12985	19	16	18	28	21	25
CG12986	38	30	40	49	27	35
CG1299	5007	3863	3737	4013	3425	4235
CG12990	29	16	41	35	32	42
CG12991	3053	2670	2879	2975	2389	2824
CG12992	9	9	21	16	11	12
CG12994	0	0	0	2	0	0
CG12995	1	1	1	2	1	0
CG12998	0	0	1	0	0	1
CG13000	0	0	0	1	1	2
CG13001	145	134	171	216	169	234
CG13002	93	82	55	115	16	23
CG13003	1041	893	1032	651	424	506
CG13004	1	1	2	2	2	1
CG13005	113	75	110	173	102	150
CG13008	70	49	72	39	15	32
CG13010	6	7	12	25	18	13
CG13012	1340	1247	1330	1827	1357	1565
CG13014	293	276	292	437	353	437
CG13016	190	146	180	202	164	174
CG13018	169	172	184	255	237	254
CG13021	0	0	0	0	0	0
CG13022	28	24	14	57	36	31
CG13023	9	5	14	29	19	18
CG13024	132	93	110	81	64	75
CG13025	132	108	132	189	151	192
CG13026	98	137	105	130	21	40
CG13028	2	0	1	2	1	2
CG13029	0	1	27	0	0	0
CG13031	0	0	0	0	0	0
CG13032	0	0	2	1	1	0
CG13033	12	12	8	6	3	3
CG13038	0	0	0	0	0	0
CG13039	0	0	0	0	0	0
CG1304	0	0	0	0	0	0
CG13040	0	0	0	0	0	0
CG13041	1	0	1	2	0	0
CG13042	9	14	12	6	3	4
CG13043	7	2	1	1	1	0
CG13044	0	0	0	0	0	0
CG13045	0	0	0	0	0	0
CG13046	0	0	0	0	0	0
CG13047	0	0	0	0	0	0
CG13048	0	0	0	0	0	0
CG13049	2	2	1	0	0	3
CG13050	0	1	0	0	0	0
CG13051	1	1	0	0	1	0
CG13053	1	2	0	0	0	0
CG13054	2	2	0	3	2	1
CG13055	10	9	19	38	28	21
CG13056	0	0	0	0	0	0
CG13058	0	0	0	0	0	0
CG13059	0	0	0	0	0	0
CG13060	0	0	0	0	0	0
CG13062	7	7	6	4	1	5
CG13063	0	0	0	0	0	1
CG13064	0	0	0	0	0	0
CG13065	1	1	1	0	0	0
CG13066	0	0	0	0	0	0
CG13067	103	88	126	86	74	120
CG13068	1	1	0	1	0	0
CG13069	0	0	2	3	1	3
CG1307	676	655	1666	1201	917	1112
CG13070	0	0	0	0	0	0
CG13071	0	0	0	0	0	0
CG13073	3	0	0	1	0	1
CG13074	109	114	107	242	215	257
CG13075	1	2	3	3	3	0
CG13077	150	246	92	499	621	721
CG13078	1	1	0	20	0	1
CG13081	5	0	1	1	0	3
CG13082	47	28	37	11	13	9
CG13083	2	0	4	5	1	0
CG13084	0	0	0	1	0	0
CG13085	13	18	13	22	12	21
CG13086	4	0	8	2	3	3
CG13088	94	76	91	101	74	104
CG1309	1985	1685	1805	2157	1941	2229
CG13091	9	11	14	15	21	14
CG13096	227	188	2190	341	301	313
CG13097	228	223	1220	306	268	294
CG13101	901	579	635	1866	1776	1809
CG13102	0	0	0	2	0	1
CG13108	75	57	97	130	99	126
CG1311	1157	903	1644	1120	958	1115
CG13110	0	0	0	0	0	0
CG13113	0	2	2	2	3	5
CG13114	10	24	38	29	34	53
CG13116	1146	1314	1274	1191	890	977
CG13117	270	287	368	309	214	255
CG13123	66	59	59	106	84	96
CG13124	10977	7682	8315	8795	5683	7144
CG13126	328	261	436	512	349	445
CG13127	0	0	0	0	0	0
CG13131	0	0	0	0	1	0
CG13133	15428	15578	18002	9397	7429	9098
CG13135	0	0	1	1	0	0
CG13137	0	0	1	0	0	0
CG13138	8	9	5	6	8	12
CG1314	1	0	1	1	0	0
CG13144	26	18	20	72	24	35
CG13148	8	15	4	3	6	4
CG1315	2	2	0	6	5	0
CG13151	169	147	202	200	140	172
CG13154	0	1	4	3	2	3
CG13155	0	0	1	0	1	2
CG13157	0	0	0	0	0	0
CG13159	0	0	0	0	0	0
CG1316	2603	2080	2430	3268	2286	3241
CG13160	0	0	0	0	0	0
CG13163	196	171	471	330	230	234
CG13164	21	11	23	18	4	15
CG13168	32	24	28	11	13	18
CG1317	4391	3791	4164	5231	4543	5548
CG13170	0	1	0	0	0	1
CG13171	0	0	0	0	0	0
CG13175	0	0	0	0	0	0
CG13177	478	145	46	495	55	81
CG13185	230	181	269	362	223	307
CG13186	0	0	0	0	0	0
CG13192	285	270	324	410	283	389
CG13193	0	0	0	0	0	0
CG13196	47	36	51	32	14	38
CG13197	646	588	546	849	624	746
CG13198	6	6	3	5	3	7
CG13202	107	149	133	41	34	46
CG13203	703	663	839	649	435	551
CG13204	450	421	418	582	458	560
CG13215	1	2	6	2	1	0
CG13216	0	0	0	0	0	0
CG13217	0	0	0	0	0	0
CG13218	0	0	0	0	0	0
CG13220	998	983	1474	1432	1228	1334
CG13223	0	0	0	0	0	1
CG13226	7	5	8	7	1	3
CG13227	0	0	0	1	0	0
CG13228	0	0	0	0	0	0
CG13229	58	44	32	33	19	52
CG13230	0	1	0	2	2	2
CG13231	3	5	4	5	8	5
CG13239	5	2	4	9	0	5
CG1324	0	0	0	0	0	0
CG13243	0	0	0	0	0	0
CG13244	4	2	1	0	0	1
CG13245	0	0	0	0	0	0
CG13247	18	25	17	9	15	17
CG13248	304	284	316	694	533	702
CG13250	7	5	10	45	47	50
CG13251	1008	788	974	2292	1882	2445
CG13252	788	722	720	915	691	851
CG13255	902	751	668	780	673	783
CG13258	1	2	2	0	2	0
CG13272	2	2	1	0	0	2
CG13280	1	0	0	2	2	0
CG13282	29	22	28	7	14	12
CG13283	73	19	29	14	24	21
CG13284	1621	1182	1258	2220	2296	2647
CG13285	3892	3472	3481	2565	2080	2461
CG13287	0	0	0	0	0	0
CG13288	1	2	4	11	9	6
CG13293	356	359	397	820	531	756
CG13295	488	404	407	614	447	572
CG13296	4	4	3	3	2	1
CG13297	0	0	0	1	0	0
CG13298	907	825	1753	1220	1006	1133
CG13299	0	1	0	1	0	0
CG13300	36	48	36	18	21	23
CG13305	9	5	1	2	3	2
CG13306	53	26	11	18	4	8
CG13308	0	0	0	2	0	1
CG13309	0	0	4	0	2	0
CG13310	1	0	0	1	0	0
CG13311	0	0	0	0	0	0
CG13312	1	0	0	0	0	0
CG13313	19	10	23	49	27	51
CG13314	19	18	26	19	12	14
CG13315	93	65	81	142	278	45
CG13318	5172	5925	4939	1950	1570	2150
CG13319	292	268	498	445	377	484
CG13321	1	0	1	65	0	1
CG13323	1	0	0	35	1	0
CG13324	0	0	2	5	0	5
CG13325	72	47	58	58	51	64
CG13326	0	1	3	0	1	0
CG13330	0	0	0	0	0	0
CG13331	207	201	227	276	193	290
CG13332	304	381	342	733	609	779
CG13334	0	1	1	3	1	4
CG13337	0	1	0	2	0	0
CG13339	447	404	359	663	557	684
CG13344	418	331	439	630	485	666
CG13358	4	2	2	8	5	10
CG13359	0	0	0	0	0	2
CG13360	52	54	45	72	29	45
CG13361	1	3	1	0	2	2
CG13362	2	1	1	2	4	2
CG13364	1281	1299	2272	2157	1714	1981
CG13365	569	550	666	683	636	689
CG13366	937	763	908	1044	802	1037
CG13367	368	286	283	479	366	459
CG13369	747	728	955	871	799	812
CG13373	0	0	0	0	0	0
CG13375	227	271	580	308	192	291
CG13376	1	2	5	8	6	7
CG13377	36	38	27	26	20	17
CG13380	0	0	0	0	0	0
CG13384	955	819	1033	1191	944	1089
CG13385	9	4	5	6	4	6
CG13386	166	200	372	35	28	34
CG1339	10	9	5	10	6	2
CG13390	276	234	277	358	257	333
CG13392	228	215	230	259	271	338
CG13397	188	140	203	184	194	242
CG13398	367	292	326	457	353	391
CG1340	5	0	3	1	4	1
CG13403	0	0	0	0	0	0
CG13404	220	157	205	183	136	189
CG13405	1	0	0	0	0	0
CG13407	3	3	6	1	2	2
CG13408	252	236	238	281	254	299
CG13409	532	451	556	965	844	1045
CG13423	6	9	7	1	2	5
CG13426	10	3	9	2	2	2
CG13427	8	3	2	36	3	16
CG13428	14566	9257	3318	15332	898	2572
CG13430	0	0	0	0	0	0
CG13436	192	190	168	116	86	113
CG13437	336	272	303	1105	931	1168
CG13438	0	0	0	0	0	0
CG1344	786	786	1951	1236	956	1121
CG13442	3	0	2	0	0	0
CG13443	0	0	0	0	0	0
CG13445	0	0	0	1	1	1
CG13449	160	164	133	95	58	98
CG13454	0	0	1	1	1	1
CG13455	246	209	242	123	115	140
CG13457	0	0	2	2	0	1
CG13458	237	173	192	107	47	61
CG13460	1	1	2	1	1	1
CG13461	0	0	1	0	0	0
CG13465	0	0	0	0	0	0
CG13471	0	1	0	1	0	0
CG13473	0	0	0	0	0	0
CG13474	0	0	0	0	0	0
CG13476	0	0	3	0	0	0
CG13477	1	0	2	0	0	0
CG13481	0	0	1	0	0	0
CG13482	0	0	0	12	1	0
CG13484	253	206	494	382	325	356
CG13488	21	18	19	14	8	10
CG13492	4	1	1	42	1	0
CG13494	0	0	0	0	0	0
CG13500	30	34	28	7	5	8
CG13501	4	9	1	2	3	3
CG13502	533	484	547	600	340	543
CG13506	3295	2579	2369	2651	1766	2178
CG13510	0	0	0	0	0	0
CG13511	0	0	0	0	0	0
CG13516	319	329	316	434	335	441
CG13526	0	0	0	2	0	0
CG13527	3	0	3	1	0	0
CG13531	661	464	602	727	612	727
CG13532	274	240	283	596	423	538
CG13538	0	1	0	0	0	0
CG13539	0	0	0	0	0	0
CG1354	1834	1571	2290	2022	1755	2133
CG13540	0	0	0	0	0	0
CG13541	0	0	0	1	0	0
CG13544	0	0	0	0	0	0
CG13545	0	0	0	1	1	1
CG13551	2788	2652	4962	3802	3530	3855
CG13557	2	0	0	0	0	0
CG13558	80	106	53	8	6	5
CG13559	7	4	3	1	4	0
CG13560	1	3	5	2	0	0
CG13561	3	1	1	3	0	0
CG13562	56	57	69	44	43	42
CG13563	18	13	2	17	6	4
CG13564	12	8	8	7	1	5
CG13566	8	15	14	15	7	14
CG13575	11	1	8	6	4	3
CG13577	0	0	0	0	0	0
CG13578	1786	1556	1531	5620	4312	5667
CG13579	8	9	17	9	5	8
CG1358	2101	1759	1911	5263	4309	5241
CG13581	4	3	6	3	0	4
CG13585	4998	4379	4602	5849	4914	5879
CG13587	68	54	47	36	43	49
CG13589	0	0	0	1	0	0
CG13590	0	1	0	0	0	0
CG13594	776	820	961	693	443	572
CG13599	48	22	371	17	25	18
CG1360	97	112	150	231	142	200
CG13601	536	527	509	706	631	695
CG13603	1658	1480	1520	1957	1715	2155
CG13604	420	298	415	603	449	577
CG13605	561	467	714	774	575	681
CG13606	61	60	58	289	216	302
CG13607	17	16	19	26	56	7
CG13609	49	44	116	66	40	60
CG13611	95	74	95	197	85	165
CG13613	0	0	0	0	0	0
CG13614	0	0	0	0	0	0
CG13615	0	0	0	0	0	0
CG13616	28	15	22	4	4	1
CG13617	185	158	167	371	294	384
CG13618	42	36	50	31	20	31
CG13622	88	81	81	151	130	192
CG13623	409	344	442	583	451	537
CG13625	292	260	320	417	338	405
CG13627	0	1	0	0	0	0
CG13630	512	409	498	608	475	552
CG13631	2165	2047	2156	1726	1371	1617
CG13634	0	4	2	1	2	2
CG13639	3	5	2	2	3	0
CG13640	2	2	1	0	1	0
CG13641	7	7	4	5	10	2
CG13643	3	0	2	2	0	1
CG13646	2	3	7	3	2	6
CG13650	1478	1272	1364	2573	2321	2836
CG13653	0	0	0	0	0	0
CG13654	470	443	435	562	499	546
CG13658	176	158	147	215	189	190
CG13659	66	69	47	850	683	871
CG13663	478	439	630	437	426	504
CG13667	223	171	329	195	171	241
CG13670	8	2	5	3	0	3
CG13671	490	396	452	538	427	546
CG13674	0	5	2	4	2	6
CG13675	0	1	0	3	3	1
CG13676	32	25	17	11	15	13
CG13678	1	1	3	0	1	2
CG13679	1	5	5	3	3	5
CG1368	2	1	10	0	0	0
CG13685	1176	1150	1326	1261	950	1222
CG13689	132	119	295	130	132	154
CG13690	1	5	260	3	1	3
CG13692	425	340	396	753	534	703
CG13693	0	0	0	0	0	0
CG13694	16	10	22	105	69	120
CG13698	2358	2021	2114	2964	2753	3360
CG13699	198	241	267	209	96	58
CG13700	6	8	5	8	5	4
CG13704	15	9	12	22	0	5
CG13705	13	22	18	19	5	11
CG13707	427	303	362	205	156	196
CG13708	442	377	438	380	226	340
CG1371	964	834	1079	1000	770	1017
CG13711	0	0	0	0	0	0
CG13712	0	0	0	0	0	0
CG13713	0	0	0	0	1	0
CG13716	4	2	6	3	1	3
CG13720	0	0	0	0	0	0
CG13721	6	4	2	14	6	14
CG13722	189	169	215	117	99	109
CG13723	0	0	0	0	0	0
CG13724	2	0	2	0	0	2
CG13725	0	0	1	0	0	0
CG13727	0	0	0	0	0	0
CG13728	0	0	0	1	0	0
CG13731	0	1	0	0	0	0
CG13733	4	1	8	13	5	9
CG13737	2	0	2	4	0	0
CG13738	5	4	4	5	1	2
CG13739	0	0	0	2	2	3
CG13741	21	20	36	35	29	52
CG13742	31	28	151	77	70	108
CG13743	501	486	556	294	209	291
CG13744	0	0	0	0	0	0
CG13747	0	0	0	0	0	0
CG13748	1	1	1	1	0	0
CG13749	18	17	17	29	26	27
CG13751	656	579	749	1026	787	969
CG13759	1	1	2	4	1	8
CG13760	653	620	895	883	712	827
CG13766	250	213	197	329	276	283
CG13771	2	3	1	1	0	4
CG13773	154	169	204	170	186	219
CG13775	98	106	93	108	96	113
CG13784	2198	1814	2213	3073	2697	3159
CG13786	0	0	0	0	0	0
CG13793	235	204	241	117	89	105
CG13794	1134	964	1104	1017	889	1172
CG13795	323	255	309	302	284	283
CG13796	413	310	472	317	233	237
CG13801	1	0	0	0	0	0
CG13806	0	1	0	2	0	0
CG13807	421	316	487	483	378	445
CG13810	1	0	0	2	0	1
CG13813	4	11	10	11	10	15
CG13827	178	164	179	145	139	142
CG13829	3	2	0	1	0	3
CG13833	12267	11304	10478	10196	8023	9876
CG13837	7	5	5	7	8	9
CG13838	3	2	6	3	3	3
CG13840	0	0	0	0	0	0
CG13841	1312	1155	978	1037	891	986
CG13842	949	876	1021	658	413	570
CG13843	35	36	30	65	28	59
CG13847	2	4	3	3	2	3
CG13850	590	487	523	641	518	627
CG13855	1119	981	1174	718	573	674
CG13856	634	579	545	465	456	618
CG13857	41	24	35	15	9	21
CG13862	0	0	0	0	0	0
CG13865	1002	1065	1087	1362	1172	1422
CG13868	9583	7439	7865	13458	9729	13712
CG13869	5	0	2	6	2	9
CG1387	3	0	4	0	0	3
CG13870	9	7	6	3	2	2
CG13871	3	2	6	16	6	6
CG13872	0	0	1	6	2	1
CG13875	67	64	61	85	56	66
CG13876	170	130	157	273	226	234
CG13877	19	16	18	12	12	23
CG13884	2	0	2	4	5	10
CG13887	4380	3846	4843	5201	4517	5367
CG13890	488	483	460	729	642	747
CG13891	2	2	2	1	0	0
CG13893	1212	1101	1056	1374	1305	1489
CG13894	107	85	112	220	143	208
CG13895	430	365	430	413	340	438
CG13896	80	58	164	88	71	86
CG13898	4	4	2	4	4	5
CG13900	342	251	1081	523	431	485
CG13901	273	298	514	457	397	419
CG13902	396	370	583	590	430	517
CG13905	1	0	0	0	1	2
CG13907	4369	3920	4079	4470	3532	4220
CG13912	3	1	6	12	15	3
CG13917	3160	2376	3131	4240	3170	3843
CG13919	133	102	119	152	104	125
CG13920	602	496	480	813	490	584
CG13921	71	50	358	43	37	34
CG13924	292	280	284	204	143	189
CG13926	43	54	63	102	77	94
CG13928	4307	3775	4410	11386	8593	11239
CG13930	84	81	90	50	63	57
CG13931	159	199	143	120	71	81
CG13933	871	682	763	1194	929	1102
CG13937	2250	1942	2598	3377	2622	3425
CG1394	7	8	4	189	212	254
CG13946	0	0	0	0	2	0
CG13947	1	0	1	6	1	0
CG13949	141	144	149	312	259	344
CG13950	6313	6240	7960	3613	2936	3397
CG13954	31	25	20	91	58	69
CG13955	25	23	18	53	30	43
CG13962	3	7	2	0	1	0
CG13965	63	56	54	41	55	48
CG13970	3	4	2	29	19	10
CG13972	66	54	55	61	44	46
CG13978	0	1	4	2	0	0
CG13982	84	114	118	192	122	184
CG13983	0	0	0	0	0	0
CG13984	0	0	0	0	0	1
CG13989	0	0	1	0	0	0
CG13991	0	1	1	1	1	0
CG13992	3	1	1	2	2	5
CG13994	356	370	577	495	457	502
CG13995	539	432	621	782	430	652
CG13996	5	11	8	3	6	6
CG13998	0	2	0	0	0	0
CG13999	169	160	173	261	202	293
CG14000	0	0	0	0	0	0
CG14005	258	261	937	353	303	355
CG14006	3	3	1	6	0	0
CG14007	8	2	0	7	1	4
CG14011	0	0	1	1	0	0
CG14013	0	1	2	3	0	0
CG14014	0	0	0	0	0	1
CG14015	470	468	485	444	338	430
CG14017	9	7	18	5	4	8
CG1402	32	32	22	26	15	19
CG14020	453	363	435	921	820	967
CG14022	270	199	149	178	63	118
CG14024	79	64	57	274	156	225
CG14034	11	8	13	3	2	9
CG14036	3	0	78	1	0	2
CG14042	0	0	0	0	0	0
CG14043	455	377	502	626	502	622
CG14044	237	225	240	555	389	491
CG14050	109	76	92	88	78	109
CG14052	53	56	47	27	15	27
CG14053	56	40	57	64	46	63
CG14054	6	4	4	8	8	4
CG14057	103	92	218	103	72	98
CG14062	3	3	6	0	0	0
CG14069	4	2	3	0	0	1
CG1407	337	282	334	446	384	443
CG14070	0	0	0	2	0	0
CG14071	0	1	0	1	0	0
CG14072	0	0	1	1	0	1
CG14073	871	699	1063	1085	731	901
CG14074	123	103	145	140	93	147
CG14075	1	1	1	2	0	2
CG14077	64	45	45	71	43	49
CG14079	313	231	264	730	573	690
CG14082	388	411	356	739	487	646
CG14085	853	866	994	519	437	530
CG14086	0	0	3	0	0	1
CG14088	2	6	0	1	0	3
CG14089	0	0	0	1	1	0
CG1409	0	0	0	0	0	0
CG14095	0	0	0	0	0	1
CG14096	0	0	0	0	0	0
CG14100	250	212	516	326	297	321
CG14102	214	216	253	307	254	285
CG14103	825	698	1106	1055	988	1119
CG14104	84	69	94	107	101	101
CG14105	924	722	693	411	258	287
CG14106	8	3	7	3	0	3
CG14107	2	9	3	3	2	3
CG14109	763	427	382	483	112	212
CG14110	2	2	3	0	1	2
CG14111	1	0	0	0	0	0
CG14113	1	0	0	0	0	0
CG14115	0	0	0	0	0	0
CG14117	171	172	253	199	177	187
CG14118	6	5	5	8	2	1
CG14120	0	0	0	23	0	0
CG14125	1	0	0	0	0	0
CG14130	245	231	317	342	258	304
CG14131	62	64	93	79	42	46
CG14132	585	478	483	403	313	476
CG14135	305	287	433	469	360	440
CG14137	5	0	2	2	2	0
[truncated: 15,707 more rows]

## Sheet: auditory gene expression
Rank	Gene Symbol	Auditory organ expression	CS expression
1	CG8369	12.7	yes
2	Arr2	12.22	no
3	Pdh	11.76	no
4	Os-C	11.49	yes
5	Ggamma30A	11.24	yes
6	Gbeta76C	10.99	no
7	Cam	10.39	yes
8	a5	10.32	yes
9	CdsA	10.29	yes
10	CG1561	10.17	no
11	Naam	10.15	yes
12	Rh4	10.14	no
13	cpx	10.05	yes
14	inaF-B/D	10.02	no
15	a10	9.96	yes
16	CG5687	9.93	yes
17	se	9.82	yes
18	retinin	9.8	no
19	trp	9.65	yes
20	Eaat2	9.3	yes

## Sheet: amos EdgeR analysis
9,462 genes expressed in CS or amos							187 genes downregulated in amos								154 genes upregulated in amos
Symbol	logFC	logCPM	PValue	FDR			Symbol	logFC	logCPM	PValue	FDR	FBgn ID			Symbol	logFC	logCPM	PValue	FDR	FBgn ID
Or47b	-7.17385	6.54338	9.28638e-132	8.78677e-128			Or47b	-7.17385	6.54338	9.28638e-132	8.78677e-128	FBgn0026385			IM14	12.2463	3.88777	1.58681e-51	5.00478e-49	FBgn0067905
Orco	-4.94597	10.6508	1.1141e-97	5.27079e-94			Orco	-4.94597	10.6508	1.1141e-97	5.27079e-94	FBgn0037324			CG17097	9.48389	1.16166	1.51471e-22	1.21459e-20	FBgn0265264
GstE4	-6.15111	10.5985	6.72811e-92	2.12205e-88			GstE4	-6.15111	10.5985	6.72811e-92	2.12205e-88	FBgn0063496			CG4570	8.02974	4.38524	4.01168e-08	9.32642e-07	FBgn0037844
Or67d	-8.66379	5.47841	9.60617e-91	2.27234e-87			Or67d	-8.66379	5.47841	9.60617e-91	2.27234e-87	FBgn0036080			Incenp	7.54155	4.42575	2.67569e-07	5.29653e-06	FBgn0260991
CG33177	-5.34615	7.06385	2.08194e-87	3.93986e-84			CG33177	-5.34615	7.06385	2.08194e-87	3.93986e-84	FBgn0053177			CG31683	7.48054	1.72015	4.15339e-33	6.04606e-31	FBgn0051683
Obp28a	-4.47119	11.4504	4.78547e-87	7.54669e-84			Obp28a	-4.47119	11.4504	4.78547e-87	7.54669e-84	FBgn0011283			CR45600	7.0999	3.29456	1.36099e-41	3.06612e-39	FBgn0267160
CG31288	-5.36665	6.66799	3.32588e-78	4.49564e-75			CG31288	-5.36665	6.66799	3.32588e-78	4.49564e-75	FBgn0051288			aurB	6.49344	2.70491	1.19634e-08	3.06769e-07	FBgn0024227
Jhedup	-6.24801	11.8761	1.7205e-71	2.03492e-68			Jhedup	-6.24801	11.8761	1.7205e-71	2.03492e-68	FBgn0034076			CG12970	6.34703	1.10606	3.54806e-25	3.32394e-23	FBgn0034047
CG34342	-3.31082	7.42568	5.37289e-69	5.6487e-66			CG34342	-3.31082	7.42568	5.37289e-69	5.6487e-66	FBgn0085371			twe	5.83863	4.09743	1.30806e-05	0.000168164	FBgn0002673
Kua	-3.5475	7.40657	2.12024e-68	2.00617e-65			Kua	-3.5475	7.40657	2.12024e-68	2.00617e-65	FBgn0032850			Cdc6	5.70533	4.01429	9.45352e-06	0.000128704	FBgn0035918
Sp1	-3.88247	8.1831	1.83345e-65	1.5771e-62			Sp1	-3.88247	8.1831	1.83345e-65	1.5771e-62	FBgn0020378			Cyp6a14	5.69028	3.72448	1.22943e-34	2.00567e-32	FBgn0033302
OS9	-5.84653	11.7867	8.5486e-65	6.74057e-62			OS9	-5.84653	11.7867	8.5486e-65	6.74057e-62	FBgn0042129			CG8170	5.6749	1.34565	1.13653e-24	1.01451e-22	FBgn0033365
CR44960	-4.64882	6.37485	5.90677e-63	3.8156e-60			Gr64f	-5.09136	5.4396	6.02384e-63	3.8156e-60	FBgn0052255			wisp	5.65882	4.20032	1.10265e-05	0.000145716	FBgn0260780
Gr64f	-5.09136	5.4396	6.02384e-63	3.8156e-60			CR44960	-4.64882	6.37485	5.90677e-63	3.8156e-60	FBgn0266275			squ	5.39307	3.56319	3.98791e-07	7.34116e-06	FBgn0267347
CG7509	5.2499	5.11921	6.04882e-63	3.8156e-60			Or85b	-6.93049	4.7956	2.23028e-61	1.31893e-58	FBgn0037590			CG7509	5.2499	5.11921	6.04882e-63	3.8156e-60	FBgn0035575
Or85b	-6.93049	4.7956	2.23028e-61	1.31893e-58			Or65a	-8.42072	5.13731	1.06276e-60	5.9152e-58	FBgn0041625			CycB3	5.15078	5.73124	2.91794e-06	4.54862e-05	FBgn0015625
Or65a	-8.42072	5.13731	1.06276e-60	5.9152e-58			CG40486	-5.87598	9.71201	4.04253e-60	2.12502e-57	FBgn0263830			dah	5.04691	4.39937	0.000133312	0.00129773	FBgn0015926
CG40486	-5.87598	9.71201	4.04253e-60	2.12502e-57			Or56a	-8.02643	4.73734	1.83267e-59	9.12669e-57	FBgn0034473			CG6337	5.04358	2.08932	1.46638e-26	1.52471e-24	FBgn0033873
Or56a	-8.02643	4.73734	1.83267e-59	9.12669e-57			Or7a	-6.62117	4.70316	6.75476e-57	3.19568e-54	FBgn0030016			Pen	5.02269	4.04712	1.99751e-06	3.22533e-05	FBgn0267727
Or7a	-6.62117	4.70316	6.75476e-57	3.19568e-54			Or65b	-7.89768	5.23758	5.17523e-56	2.33181e-53	FBgn0041624			CG6912	4.93609	4.35814	1.79991e-27	2.05189e-25	FBgn0038290
Or65b	-7.89768	5.23758	5.17523e-56	2.33181e-53			Or67c	-9.08788	4.02287	3.09531e-55	1.33127e-52	FBgn0036078			CG34265	4.91171	3.86762	4.67048e-34	7.09151e-32	FBgn0085294
Or67c	-9.08788	4.02287	3.09531e-55	1.33127e-52			Gr63a	-7.77979	4.61028	9.70347e-55	3.99192e-52	FBgn0035468			sti	4.75455	3.90386	0.000153504	0.00146895	FBgn0002466
Gr63a	-7.77979	4.61028	9.70347e-55	3.99192e-52			Cyp6a2	-2.97206	10.0411	6.26203e-54	2.46881e-51	FBgn0000473			CycA	4.69425	4.87089	5.26381e-05	0.000583894	FBgn0000404
Cyp6a2	-2.97206	10.0411	6.26203e-54	2.46881e-51			CG9541	-2.78801	8.12192	6.3036e-53	2.29403e-50	FBgn0032083			ea	4.45222	4.93099	2.28074e-42	5.39509e-40	FBgn0000533
Spn43Ab	3.97389	7.00347	5.72317e-53	2.16611e-50			Snmp1	-3.08387	9.62382	7.53222e-53	2.63963e-50	FBgn0260004			Gr98b	4.44592	4.45571	6.9899e-30	8.81846e-28	FBgn0046887
CG9541	-2.78801	8.12192	6.3036e-53	2.29403e-50			OSCP1	-3.23239	6.85952	1.27379e-52	4.3045e-50	FBgn0033685			CG8173	4.25443	3.81987	3.66662e-05	0.000424646	FBgn0030864
Snmp1	-3.08387	9.62382	7.53222e-53	2.63963e-50			CG42540	-3.01997	8.17469	3.52238e-52	1.14927e-49	FBgn0260657			Spn42De	4.1957	0.00615239	6.82774e-14	3.24643e-12	FBgn0033115
OSCP1	-3.23239	6.85952	1.27379e-52	4.3045e-50			Or67a	-8.01946	4.2859	7.65381e-50	2.33614e-47	FBgn0036009			Sep5	4.17392	1.95056	7.31345e-06	0.000102215	FBgn0026361
CG42540	-3.01997	8.17469	3.52238e-52	1.14927e-49			GstD8	-2.95045	7.08988	8.475e-50	2.50595e-47	FBgn0010044			CG17018	4.14516	4.47268	2.77213e-07	5.43061e-06	FBgn0039972
IM14	12.2463	3.88777	1.58681e-51	5.00478e-49			Or9a	-7.12687	5.27684	1.30786e-48	3.74998e-46	FBgn0030204			CR45822	4.14141	1.9876	6.45508e-21	4.84746e-19	FBgn0267472
Or67a	-8.01946	4.2859	7.65381e-50	2.33614e-47			Galphaf	-3.86265	5.4005	2.23731e-47	6.22629e-45	FBgn0010223			Mcm7	4.14058	3.08822	5.52846e-05	0.000608967	FBgn0020633
GstD8	-2.95045	7.08988	8.475e-50	2.50595e-47			Osi8	-6.24118	7.59328	1.3905e-46	3.75913e-44	FBgn0037415			Spn43Ab	3.97389	7.00347	5.72317e-53	2.16611e-50	FBgn0024293
Or9a	-7.12687	5.27684	1.30786e-48	3.74998e-46			Or43a	-7.16961	4.81226	5.16997e-46	1.35223e-43	FBgn0026389			Cyp6a19	3.97004	0.000882369	1.29999e-12	5.49129e-11	FBgn0033979
Galphaf	-3.86265	5.4005	2.23731e-47	6.22629e-45			CG9555	-5.21892	4.64023	5.28772e-46	1.35223e-43	FBgn0032085			CG13558	3.8735	1.22764	1.93172e-14	9.7223e-13	FBgn0034869
Osi8	-6.24118	7.59328	1.3905e-46	3.75913e-44			Or59b	-2.71299	7.16554	1.59389e-45	3.96879e-43	FBgn0034865			Cdk1	3.85701	4.12154	0.000108297	0.0010878	FBgn0004106
Or43a	-7.16961	4.81226	5.16997e-46	1.35223e-43			Tsp42Ef	-2.67315	9.26038	2.09263e-45	5.07703e-43	FBgn0033127			CG4586	3.85603	3.11402	0.000425185	0.00343561	FBgn0029924
CG9555	-5.21892	4.64023	5.28772e-46	1.35223e-43			Or23a	-8.01435	3.64224	2.48344e-42	5.73129e-40	FBgn0026395			CG16798	3.77352	1.95732	8.28917e-16	4.64095e-14	FBgn0032856
Or59b	-2.71299	7.16554	1.59389e-45	3.96879e-43			CR44541	-7.82221	3.15454	2.21978e-40	4.88455e-38	FBgn0265734			PCNA	3.76295	3.15524	0.000124229	0.00122061	FBgn0005655
Tsp42Ef	-2.67315	9.26038	2.09263e-45	5.07703e-43			CG6938	-2.50553	6.91498	5.0333e-40	1.08239e-37	FBgn0036235			CG2678	3.74272	1.86416	1.15275e-05	0.000151491	FBgn0014931
ea	4.45222	4.93099	2.28074e-42	5.39509e-40			CG42237	-3.40961	5.71559	5.61249e-40	1.18012e-37	FBgn0250862			ncd	3.72087	4.04545	0.000181549	0.0016891	FBgn0002924
Or23a	-8.01435	3.64224	2.48344e-42	5.73129e-40			Obp69a	-7.66013	10.2736	6.01104e-40	1.23645e-37	FBgn0011279			CG3679	3.68364	3.55933	0.000125612	0.00123292	FBgn0027521
CR45600	7.0999	3.29456	1.36099e-41	3.06612e-39			Or83c	-7.52509	2.85502	8.39276e-40	1.68962e-37	FBgn0037399			CG10336	3.61783	3.16889	2.37368e-16	1.3612e-14	FBgn0032698
CR44541	-7.82221	3.15454	2.21978e-40	4.88455e-38			Or49b	-5.92206	3.67356	2.86993e-39	5.65734e-37	FBgn0028963			mad2	3.60225	3.45072	1.98306e-05	0.000247543	FBgn0035640
CG6938	-2.50553	6.91498	5.0333e-40	1.08239e-37			Or85a	-7.65485	4.25395	1.14561e-38	2.2122e-36	FBgn0037576			tej	3.59315	2.88564	8.52697e-05	0.000890532	FBgn0033921
CG42237	-3.40961	5.71559	5.61249e-40	1.18012e-37			Or43b	-3.49008	5.40859	2.78059e-37	5.26199e-35	FBgn0026393			feo	3.53232	2.9166	0.000157611	0.00150183	FBgn0030241
Obp69a	-7.66013	10.2736	6.01104e-40	1.23645e-37			CG15169	-2.62794	7.57857	3.12977e-37	5.80665e-35	FBgn0032734			CG17672	3.47725	2.65795	2.35886e-19	1.61736e-17	FBgn0083978
Or83c	-7.52509	2.85502	8.39276e-40	1.68962e-37			CG30274	-2.65715	6.5019	5.63367e-37	1.02511e-34	FBgn0050274			RhoGEF4	3.47638	3.01584	9.40591e-06	0.00012824	FBgn0035761
Or49b	-5.92206	3.67356	2.86993e-39	5.65734e-37			Or69a	-7.49871	4.10092	7.40026e-37	1.32116e-34	FBgn0041622			Mur89F	3.43081	1.57118	3.86446e-12	1.52994e-10	FBgn0038492
Or85a	-7.65485	4.25395	1.14561e-38	2.2122e-36			Gr21a	-5.92486	3.92851	1.95014e-36	3.41708e-34	FBgn0041250			dup	3.41046	5.0661	0.000391631	0.00320278	FBgn0000996
Or43b	-3.49008	5.40859	2.78059e-37	5.26199e-35			unpg	-5.83678	3.0024	4.18431e-35	7.19854e-33	FBgn0015561			Spn88Eb	3.3495	0.381208	1.69456e-10	5.66571e-09	FBgn0038299
CG15169	-2.62794	7.57857	3.12977e-37	5.80665e-35			Nep1	-2.23765	7.88238	6.99552e-35	1.18199e-32	FBgn0029843			Hsp23	3.3353	4.6765	7.09005e-19	4.56368e-17	FBgn0001224
CG30274	-2.65715	6.5019	5.63367e-37	1.02511e-34			toy	-3.1361	6.33347	1.01209e-34	1.68006e-32	FBgn0019650			fend	3.31333	3.35495	6.24637e-06	8.85164e-05	FBgn0030090
Or69a	-7.49871	4.10092	7.40026e-37	1.32116e-34			Or13a	-5.49443	4.13707	2.30213e-34	3.692e-32	FBgn0030715			BubR1	3.2826	3.54798	3.54706e-05	0.000411807	FBgn0263855
Gr21a	-5.92486	3.92851	1.95014e-36	3.41708e-34			CG3349	-7.13678	2.48504	2.94607e-34	4.64595e-32	FBgn0036459			Mcm5	3.26978	2.82623	3.05236e-05	0.000363892	FBgn0017577
unpg	-5.83678	3.0024	4.18431e-35	7.19854e-33			GstD11	-2.17966	7.49331	3.50335e-34	5.43422e-32	FBgn0038029			CG7384	3.20485	3.3601	0.000173974	0.00162985	FBgn0032262
Nep1	-2.23765	7.88238	6.99552e-35	1.18199e-32			Or98a	-7.92276	5.52473	4.72168e-34	7.09151e-32	FBgn0039551			scra	3.20231	3.92489	3.30568e-05	0.000389034	FBgn0261385
toy	-3.1361	6.33347	1.01209e-34	1.68006e-32			Or22a	-7.31686	5.34087	7.23356e-34	1.06944e-31	FBgn0026398			Klp67A	3.17499	2.54242	0.000228463	0.00205878	FBgn0004379
Cyp6a14	5.69028	3.72448	1.22943e-34	2.00567e-32			Or19b	-6.49652	3.85129	4.50053e-33	6.45212e-31	FBgn0062565			CG13386	3.11541	2.8422	2.03233e-14	1.01745e-12	FBgn0032040
Or13a	-5.49443	4.13707	2.30213e-34	3.692e-32			CR45502	-6.32742	3.6622	9.41074e-33	1.32902e-30	FBgn0267058			Caf1-180	3.0789	4.77621	0.000184086	0.00170433	FBgn0030054
CG3349	-7.13678	2.48504	2.94607e-34	4.64595e-32			CG7342	-2.33589	7.40019	1.44731e-32	2.01389e-30	FBgn0038716			CG14247	3.00768	1.06097	2.07287e-12	8.56484e-11	FBgn0039454
GstD11	-2.17966	7.49331	3.50335e-34	5.43422e-32			Hf	-3.63293	7.12835	2.18192e-32	2.99208e-30	FBgn0014000			pim	3.00592	4.25703	0.000366056	0.00304093	FBgn0003087
CG34265	4.91171	3.86762	4.67048e-34	7.09151e-32			Or19a	-6.63309	2.28781	6.04483e-32	8.05581e-30	FBgn0041626			CR43651	3.00285	1.79706	4.57494e-05	0.000515948	FBgn0263660
Or98a	-7.92276	5.52473	4.72168e-34	7.09151e-32			CG17919	-2.02079	9.22805	1.09164e-31	1.4346e-29	FBgn0037433			CG32512	2.99809	4.21808	1.23268e-05	0.000160878	FBgn0052512
Or22a	-7.31686	5.34087	7.23356e-34	1.06944e-31			Or67b	-6.0257	3.52416	1.57993e-31	2.04785e-29	FBgn0036019			Rif1	2.97561	4.82863	0.000710951	0.00527196	FBgn0050085
CG31683	7.48054	1.72015	4.15339e-33	6.04606e-31			ppk6	-5.50484	2.25324	2.60031e-30	3.32488e-28	FBgn0034489			CR43170	2.95397	2.47841	1.95732e-15	1.05829e-13	FBgn0262789
Or19b	-6.49652	3.85129	4.50053e-33	6.45212e-31			CG16713	-3.14435	5.87755	9.25856e-30	1.15269e-27	FBgn0031560			tfc	2.95252	1.06957	3.9312e-05	0.00045142	FBgn0035199
CR45502	-6.32742	3.6622	9.41074e-33	1.32902e-30			Or2a	-5.29195	3.02224	1.05208e-29	1.29283e-27	FBgn0023523			CG13599	2.94522	2.05963	0.000120941	0.00119327	FBgn0039128
CG7342	-2.33589	7.40019	1.44731e-32	2.01389e-30			Or88a	-5.96485	2.43286	1.27096e-29	1.54177e-27	FBgn0038203			Orc1	2.91595	3.00695	0.000530859	0.00413755	FBgn0022772
Hf	-3.63293	7.12835	2.18192e-32	2.99208e-30			Tsp42A	-9.53116	1.25563	1.01413e-28	1.21465e-26	FBgn0033042			CG34227	2.9108	0.826542	9.43692e-10	2.88039e-08	FBgn0085256
Cyp6a8	2.80573	7.22705	3.32035e-32	4.48816e-30			CG7786	-5.00647	2.36592	3.55962e-28	4.21014e-26	FBgn0034096			Tim17a2	2.90351	0.624748	2.59591e-09	7.37614e-08	FBgn0037307
Or19a	-6.63309	2.28781	6.04483e-32	8.05581e-30			halo	-6.92079	1.41192	1.31104e-27	1.53149e-25	FBgn0001174			tut	2.89309	3.06693	4.6393e-16	2.61292e-14	FBgn0052364
CG17919	-2.02079	9.22805	1.09164e-31	1.4346e-29			CG17321	-2.8074	5.45022	1.73854e-27	2.00611e-25	FBgn0032719			Rh4	2.89267	1.46704	1.96863e-13	9.13096e-12	FBgn0003250
Or67b	-6.0257	3.52416	1.57993e-31	2.04785e-29			CG43222	-3.68086	4.36819	3.14232e-27	3.5396e-25	FBgn0262858			Hsp26	2.8706	4.65733	4.81005e-15	2.51452e-13	FBgn0001225
ppk6	-5.50484	2.25324	2.60031e-30	3.32488e-28			amd	-2.02536	7.29252	3.58555e-27	3.99135e-25	FBgn0000075			nxf2	2.86291	3.03817	1.6087e-06	2.64722e-05	FBgn0036640
Gr98b	4.44592	4.45571	6.9899e-30	8.81846e-28			CR43834	-9.35184	1.08617	3.69847e-27	4.06918e-25	FBgn0264382			Hr83	2.86083	0.769192	2.12576e-08	5.184e-07	FBgn0037436
CG16713	-3.14435	5.87755	9.25856e-30	1.15269e-27			CG11852	-3.6379	5.2417	3.84337e-27	4.18e-25	FBgn0039297			CG43236	2.85306	0.416857	1.49047e-09	4.36619e-08	FBgn0262881
Or2a	-5.29195	3.02224	1.05208e-29	1.29283e-27			SLC5A11	-2.01858	7.27531	6.56254e-27	7.05622e-25	FBgn0031998			CR44646	2.83536	-0.15734	2.75242e-08	6.59326e-07	FBgn0265857
Or88a	-5.96485	2.43286	1.27096e-29	1.54177e-27			l(2)34Fc	-2.55147	5.90621	6.93288e-27	7.37066e-25	FBgn0261534			Cyp6a8	2.80573	7.22705	3.32035e-32	4.48816e-30	FBgn0013772
Tsp42A	-9.53116	1.25563	1.01413e-28	1.21465e-26			lush	-7.65935	10.32	1.00776e-26	1.05949e-24	FBgn0020277			Poc1	2.77443	3.52731	0.000222243	0.00201038	FBgn0036354
CG7786	-5.00647	2.36592	3.55962e-28	4.21014e-26			Or33a	-6.76053	1.25125	1.5818e-26	1.60935e-24	FBgn0026392			CG8861	2.73997	1.71665	2.05762e-11	7.54618e-10	FBgn0037676
halo	-6.92079	1.41192	1.31104e-27	1.53149e-25			CG12911	-5.10613	3.13708	1.57748e-26	1.60935e-24	FBgn0033501			asp	2.72415	3.33252	0.00149058	0.00982164	FBgn0000140
CG17321	-2.8074	5.45022	1.73854e-27	2.00611e-25			CG1394	-4.87044	2.40819	7.03903e-26	7.01087e-24	FBgn0030277			AGO3	2.7218	4.25423	0.00117313	0.00802562	FBgn0250816
CG6912	4.93609	4.35814	1.79991e-27	2.05189e-25			Tsp42En	-2.08239	6.61996	1.1026e-25	1.07555e-23	FBgn0033135			CR32111	2.71467	1.48155	7.08768e-12	2.75982e-10	FBgn0052111
CG43222	-3.68086	4.36819	3.14232e-27	3.5396e-25			CG34309	-2.13725	7.07952	1.41757e-25	1.36868e-23	FBgn0259831			CG12702	2.71303	2.92066	0.000758836	0.00556598	FBgn0031070
amd	-2.02536	7.29252	3.58555e-27	3.99135e-25			CG7896	-3.69654	4.00349	2.02753e-25	1.93783e-23	FBgn0039728			PPO1	2.67121	3.25223	9.14666e-07	1.5622e-05	FBgn0283437
CR43834	-9.35184	1.08617	3.69847e-27	4.06918e-25			CR44065	-4.28555	3.35347	2.26113e-25	2.13948e-23	FBgn0264874			Spn85F	2.64332	-0.334214	4.30862e-07	7.84004e-06	FBgn0037772
CG11852	-3.6379	5.2417	3.84337e-27	4.18e-25			Or22b	-7.48586	4.87051	4.67162e-25	4.25027e-23	FBgn0026397			CG11164	2.63004	3.45726	0.00118217	0.00807628	FBgn0030507
SLC5A11	-2.01858	7.27531	6.56254e-27	7.05622e-25			CG43861	-3.23493	4.5925	6.14353e-25	5.5362e-23	FBgn0264443			Elba2	2.59267	3.10156	0.000850237	0.00612668	FBgn0031435
l(2)34Fc	-2.55147	5.90621	6.93288e-27	7.37066e-25			CG42766	-5.20868	3.57919	1.90766e-24	1.68694e-22	FBgn0261834			spd-2	2.58807	1.48824	5.94133e-05	0.000650658	FBgn0027500
lush	-7.65935	10.32	1.00776e-26	1.05949e-24			ninaB	-3.00529	4.85988	2.4253e-24	2.12484e-22	FBgn0002937			CG30046	2.58784	1.91657	2.77669e-06	4.34983e-05	FBgn0050046
CG6337	5.04358	2.08932	1.46638e-26	1.52471e-24			CG5071	-3.01598	5.11656	9.07309e-24	7.80451e-22	FBgn0039347			mthl3	2.57032	2.7812	4.42126e-13	1.9733e-11	FBgn0028956
CG12911	-5.10613	3.13708	1.57748e-26	1.60935e-24			hec	-3.97487	2.4897	2.88836e-23	2.37649e-21	FBgn0030437			CG30424	2.54405	0.596074	9.48681e-08	2.0827e-06	FBgn0050424
Or33a	-6.76053	1.25125	1.5818e-26	1.60935e-24			CG13659	-3.48648	4.31659	9.29049e-23	7.57816e-21	FBgn0039319			CR46254	2.52217	0.224831	7.8192e-08	1.74083e-06	FBgn0267987
HnRNP-K	-1.80405	9.82649	5.21587e-26	5.25027e-24			Or82a	-4.87326	3.1276	1.15499e-21	9.0318e-20	FBgn0041621			CG18467	2.51947	0.429279	1.05994e-08	2.7477e-07	FBgn0034218
CG1394	-4.87044	2.40819	7.03903e-26	7.01087e-24			CG43647	-3.34011	4.11842	1.44271e-21	1.11893e-19	FBgn0263656			pch2	2.50812	3.26535	0.000925665	0.00657556	FBgn0051453
Adk1	-1.86505	8.89599	8.36006e-26	8.23989e-24			CG31115	-3.77475	2.91428	4.57906e-21	3.52253e-19	FBgn0051115			nAChRbeta1	2.49103	1.95751	2.61065e-11	9.39237e-10	FBgn0000038
Tsp42En	-2.08239	6.61996	1.1026e-25	1.07555e-23			Obp83ef	-3.30817	3.98187	1.17757e-20	8.63733e-19	FBgn0046876			CG17324	2.48694	4.68652	2.95669e-15	1.5717e-13	FBgn0027074
CG34309	-2.13725	7.07952	1.41757e-25	1.36868e-23			Or85f	-3.69436	2.57526	2.11252e-20	1.53759e-18	FBgn0037685			CG7737	2.48087	2.65059	0.000844236	0.00609318	FBgn0033584
CG7896	-3.69654	4.00349	2.02753e-25	1.93783e-23			CG15170	-3.13768	4.04845	2.51817e-20	1.80507e-18	FBgn0032733			CG14219	2.45567	0.0319826	1.70363e-07	3.50429e-06	FBgn0031033
CR44065	-4.28555	3.35347	2.26113e-25	2.13948e-23			CG5079	-3.27236	3.92974	3.41369e-20	2.4286e-18	FBgn0039346			Cht5	2.44256	1.52116	2.05013e-10	6.78263e-09	FBgn0038180
CG12970	6.34703	1.10606	3.54806e-25	3.32394e-23			Or65c	-6.3056	3.61185	5.24407e-20	3.70294e-18	FBgn0041623			CR45835	2.43324	0.626023	1.21451e-08	3.10587e-07	FBgn0267485
CG5758	2.42444	6.3041	3.89488e-25	3.61307e-23			Nos	-3.72598	4.17256	5.6528e-20	3.96198e-18	FBgn0011676			tor	2.43087	2.77559	0.000116271	0.0011532	FBgn0003733
CG33288	-1.99485	6.67274	4.65255e-25	4.25027e-23			Osi7	-3.49866	2.42508	1.52187e-19	1.05882e-17	FBgn0037414			CG5758	2.42444	6.3041	3.89488e-25	3.61307e-23	FBgn0032666
Or22b	-7.48586	4.87051	4.67162e-25	4.25027e-23			CG12896	-4.88279	0.860131	1.91842e-19	1.32497e-17	FBgn0033521			CG13500	2.40798	0.0540343	2.0178e-07	4.10589e-06	FBgn0034683
CG43861	-3.23493	4.5925	6.14353e-25	5.5362e-23			CR43467	-4.42699	1.23815	4.14948e-19	2.80445e-17	FBgn0263444			mol	2.40787	4.5513	7.44147e-06	0.000103851	FBgn0086711
CG8170	5.6749	1.34565	1.13653e-24	1.01451e-22			ppk19	-4.27189	1.22501	6.23774e-19	4.07045e-17	FBgn0039679			CG34208	2.38174	4.65688	0.000157985	0.00150387	FBgn0085237
CG42766	-5.20868	3.57919	1.90766e-24	1.68694e-22			Obp19a	-7.42639	10.8106	7.88563e-19	5.04148e-17	FBgn0031109			CR43086	2.37063	2.22308	1.829e-08	4.48342e-07	FBgn0262532
ninaB	-3.00529	4.85988	2.4253e-24	2.12484e-22			mAChR-B	-2.60815	4.74923	9.96331e-19	6.32704e-17	FBgn0037546			Obp57e	2.36739	0.434229	5.66066e-06	8.09081e-05	FBgn0050145
CG17278	2.04821	6.9133	4.88021e-24	4.23638e-22			CG30339	-3.38078	2.33975	1.54285e-18	9.73231e-17	FBgn0050339			CG17777	2.36455	2.62115	1.79615e-06	2.92515e-05	FBgn0040900
CG5071	-3.01598	5.11656	9.07309e-24	7.80451e-22			CG18641	-4.54182	0.925377	3.16537e-18	1.97044e-16	FBgn0031426			mars	2.35706	4.49531	0.000349102	0.00293097	FBgn0033845
SerT	-1.81241	7.93754	9.77418e-24	8.33183e-22			Or92a	-8.35921	6.71703	3.31871e-18	2.0524e-16	FBgn0038798			Gld	2.35371	4.15904	2.70564e-12	1.10348e-10	FBgn0001112
CG31689	-1.7163	7.65337	1.44884e-23	1.22401e-21			ppk25	-2.47905	5.53032	3.80956e-18	2.34066e-16	FBgn0053349			CR14033	2.35212	4.1802	1.8558e-05	0.00023227	FBgn0046776
CG4822	-1.71028	8.59154	1.92322e-23	1.6104e-21			CG15522	-2.54614	4.79789	4.28743e-18	2.61727e-16	FBgn0039723			caup	2.34946	1.96881	5.11617e-05	0.00056885	FBgn0015919
ATP8B	-1.75992	8.09196	2.24186e-23	1.86074e-21			CG12268	-2.39436	5.20977	4.3972e-18	2.66707e-16	FBgn0039131			CR32205	2.32585	2.0675	4.50942e-05	0.000510385	FBgn0052205
hec	-3.97487	2.4897	2.88836e-23	2.37649e-21			fa2h	-2.9444	4.40233	7.67328e-18	4.59523e-16	FBgn0050502			msd5	2.32539	1.7699	0.000799422	0.00581856	FBgn0035210
CG13659	-3.48648	4.31659	9.29049e-23	7.57816e-21			CG8083	-3.14912	2.02067	1.91163e-15	1.03953e-13	FBgn0025709			Mcm6	2.32395	4.37839	0.00134551	0.00899098	FBgn0025815
CG15661	-1.729	8.42228	1.29424e-22	1.04667e-20			Or47a	-7.39013	5.70998	3.61835e-15	1.90205e-13	FBgn0026386			CG4927	2.32073	1.02294	4.58172e-08	1.04716e-06	FBgn0034139
CG17097	9.48389	1.16166	1.51471e-22	1.21459e-20			Gr93a	-3.31758	1.83163	6.25247e-15	3.2506e-13	FBgn0041229			CR42646	2.31102	0.210914	1.07364e-06	1.82057e-05	FBgn0261429
spab	-1.78651	7.25391	8.4868e-22	6.74808e-20			ppk5	-3.01362	3.13408	1.04126e-14	5.32565e-13	FBgn0053289			DptB	2.30747	1.36087	4.94955e-06	7.23842e-05	FBgn0034407
btv	-1.78058	6.89337	1.13455e-21	8.94595e-20			CG10035	-2.48076	4.42121	1.84692e-14	9.34519e-13	FBgn0038028			CG42822	2.30525	0.460623	4.22461e-06	6.295e-05	FBgn0262004
Or82a	-4.87326	3.1276	1.15499e-21	9.0318e-20			CR45042	-4.79314	-0.0679517	2.28244e-14	1.13665e-12	FBgn0266402			CG14694	2.29944	4.89695	2.78668e-11	9.95001e-10	FBgn0037845
CG43647	-3.34011	4.11842	1.44271e-21	1.11893e-19			Lgr1	-2.34841	4.57786	2.81817e-14	1.3961e-12	FBgn0016650			krimp	2.29756	2.18002	1.03121e-09	3.12733e-08	FBgn0034098
CG31115	-3.77475	2.91428	4.57906e-21	3.52253e-19			btd	-2.74552	3.45777	3.77952e-14	1.86259e-12	FBgn0000233			Apc2	2.28983	4.14997	0.000547489	0.00425315	FBgn0026598
Cyp6g1	2.02121	10.5195	5.01372e-21	3.8258e-19			CR44525	-3.85231	0.607586	4.63413e-14	2.24862e-12	FBgn0265718			Ser	2.27265	0.710525	4.42953e-07	8.01381e-06	FBgn0004197
CG30116	-1.96836	6.10317	5.3444e-21	4.0455e-19			Cpr47Ea	-2.83773	2.21375	5.55711e-14	2.68272e-12	FBgn0033597			Akap200	2.27101	6.36541	0.000253828	0.0022467	FBgn0027932
CR45822	4.14141	1.9876	6.45508e-21	4.84746e-19			5-HT2A	-2.03899	5.19922	1.85258e-13	8.63504e-12	FBgn0087012			Skp2	2.25938	4.10799	0.0003447	0.00290432	FBgn0037236
CG42284	-1.80956	6.53533	7.17339e-21	5.34446e-19			Ccp84Ac	-4.84332	-0.0131869	2.2321e-13	1.02929e-11	FBgn0004781			CR32207	2.24862	1.75387	5.73828e-05	0.000630611	FBgn0052207
CG32392	-1.61511	7.59481	9.97237e-21	7.37176e-19			ppk14	-3.93661	0.407175	2.77092e-13	1.2605e-11	FBgn0031803			CG42329	2.24241	3.87153	9.20731e-10	2.8194e-08	FBgn0259229
Obp83ef	-3.30817	3.98187	1.17757e-20	8.63733e-19			Cyp4p2	-2.67553	2.73781	6.22656e-13	2.76599e-11	FBgn0033395			CG8665	2.24067	2.59685	1.87534e-09	5.42644e-08	FBgn0032945
Or85f	-3.69436	2.57526	2.11252e-20	1.53759e-18			CR43498	-4.72279	-0.114655	7.84457e-13	3.45234e-11	FBgn0263509			mthl4	2.21498	2.71498	1.7697e-09	5.14746e-08	FBgn0034219
CG11550	-1.85777	9.71939	2.33542e-20	1.68685e-18			Obp83a	-8.18975	13.4078	9.01834e-13	3.93233e-11	FBgn0011281			SKIP	2.20883	4.36039	0.00102536	0.00716541	FBgn0051163
CG15170	-3.13768	4.04845	2.51817e-20	1.80507e-18			5-HT2B	-2.17171	4.46536	1.35179e-12	5.68473e-11	FBgn0261929			CG13921	2.19271	2.30281	0.000193221	0.00178019	FBgn0035267
CG5079	-3.27236	3.92974	3.41369e-20	2.4286e-18			CG30356	-2.54586	2.35458	3.28723e-12	1.32357e-10	FBgn0050356			CR43671	2.18542	0.749552	1.01305e-05	0.000136255	FBgn0263746
Or65c	-6.3056	3.61185	5.24407e-20	3.70294e-18			CR44285	-4.45941	-0.348561	3.67923e-12	1.46273e-10	FBgn0265312			Mal-A5	2.17519	4.49178	4.17954e-07	7.65692e-06	FBgn0050359
Nos	-3.72598	4.17256	5.6528e-20	3.96198e-18			link	-3.08825	1.10898	4.2395e-12	1.67142e-10	FBgn0033855			CG15414	2.16783	2.89303	1.37727e-08	3.47513e-07	FBgn0031542
Osi7	-3.49866	2.42508	1.52187e-19	1.05882e-17			CG6123	-3.13407	1.43493	8.25729e-12	3.189e-10	FBgn0030913			CG3788	2.13939	1.06644	0.000640349	0.00485495	FBgn0034800
CG12896	-4.88279	0.860131	1.91842e-19	1.32497e-17			Obp83b	-8.17844	12.8449	9.89641e-12	3.79109e-10	FBgn0010403			CG34215	2.13552	1.93692	3.26526e-06	5.04012e-05	FBgn0085244
CG17672	3.47725	2.65795	2.35886e-19	1.61736e-17			Gat	-2.14104	4.86935	1.15991e-11	4.39004e-10	FBgn0039915			Strica	2.13309	0.79086	0.000219634	0.00199059	FBgn0033051
bgm	-1.61183	8.66596	4.05236e-19	2.75852e-17			beat-Ia	-2.43279	3.47105	1.27382e-11	4.7829e-10	FBgn0013433			CG2816	2.1183	2.09569	4.4063e-09	1.20498e-07	FBgn0031564
CR43467	-4.42699	1.23815	4.14948e-19	2.80445e-17			CG40485	-3.00436	0.993471	2.13996e-11	7.81787e-10	FBgn0069973			SoYb	2.11435	3.57515	2.94324e-05	0.000352729	FBgn0051755
CG14153	1.51809	8.91264	4.26862e-19	2.86452e-17			CG32447	-2.55524	3.82023	2.5511e-11	9.24847e-10	FBgn0052447			Tsp42Er	2.10099	2.1142	6.58099e-09	1.7617e-07	FBgn0033139
Tsp42El	-1.97497	5.83483	4.71386e-19	3.14102e-17			CG43165	-3.15027	1.76698	9.35399e-11	3.19521e-09	FBgn0262721			TwdlT	2.07444	1.83413	4.64295e-08	1.05859e-06	FBgn0029170
CG13318	1.7341	7.53273	4.79551e-19	3.17308e-17			CR45320	-2.95877	0.93921	1.83639e-10	6.09681e-09	FBgn0266859			CG1673	2.07303	1.68684	4.13101e-06	6.17498e-05	FBgn0030482
Obp59a	1.53396	12.0021	5.37271e-19	3.53032e-17			CR30009	-2.62985	1.23548	2.28432e-10	7.50493e-09	FBgn0050009			CG7997	2.06997	2.91189	5.82501e-06	8.28816e-05	FBgn0034117
ppk19	-4.27189	1.22501	6.23774e-19	4.07045e-17			CG12672	-2.2571	2.4517	6.78357e-10	2.12537e-08	FBgn0030886			CR45955	2.06617	1.94919	2.65433e-08	6.37445e-07	FBgn0267617
CG10638	-1.64308	7.24289	6.38214e-19	4.13615e-17			nerfin-2	-2.35597	2.73263	8.20676e-10	2.56278e-08	FBgn0041105			Cyp6a9	2.06318	5.85174	8.38125e-16	4.6649e-14	FBgn0013771
Hsp23	3.3353	4.6765	7.09005e-19	4.56368e-17			Or42b	-7.52694	6.41697	9.10139e-10	2.79602e-08	FBgn0033043			CG31875	2.06258	1.82389	9.67244e-05	0.000986591	FBgn0051875
Obp19a	-7.42639	10.8106	7.88563e-19	5.04148e-17			Osi17	-2.81928	0.902875	9.5527e-10	2.90635e-08	FBgn0037427			CG17278	2.04821	6.9133	4.88021e-24	4.23638e-22	FBgn0046763
mAChR-B	-2.60815	4.74923	9.96331e-19	6.32704e-17			CG17732	-2.75893	2.22091	1.06163e-09	3.19201e-08	FBgn0036923			ninaD	2.02865	0.290142	2.3882e-05	0.000294234	FBgn0002939
CG30339	-3.38078	2.33975	1.54285e-18	9.73231e-17			CG13694	-2.3948	1.45621	2.06295e-09	5.95111e-08	FBgn0031219			Cyp6g1	2.02121	10.5195	5.01372e-21	3.8258e-19	FBgn0025454
CG9498	-1.58687	8.45202	1.80821e-18	1.13306e-16			trp	-2.28583	1.59987	2.12174e-09	6.09761e-08	FBgn0003861			CG1461	2.01689	2.88492	9.76909e-06	0.000132239	FBgn0030558
CG18641	-4.54182	0.925377	3.16537e-18	1.97044e-16			CR44237	-3.33663	-0.274829	3.06997e-09	8.64525e-08	FBgn0265168			CCHa2-R	2.00912	1.30912	2.98486e-07	5.79934e-06	FBgn0033058
Or92a	-8.35921	6.71703	3.31871e-18	2.0524e-16			CR44850	-2.44712	1.7765	7.17809e-09	1.9025e-07	FBgn0266144			CR43650	2.00761	1.20595	4.26597e-07	7.77738e-06	FBgn0263659
ppk25	-2.47905	5.53032	3.80956e-18	2.34066e-16			CR44317	-2.26177	3.75105	7.59893e-09	2.00282e-07	FBgn0265376			Tb	2.0055	0.640349	2.49583e-05	0.000306696	FBgn0243586
CG15522	-2.54614	4.79789	4.28743e-18	2.61727e-16			CR43856	-2.05294	1.87931	1.48266e-08	3.71135e-07	FBgn0264438
CG12268	-2.39436	5.20977	4.3972e-18	2.66707e-16			blanks	-2.11602	1.95436	1.60984e-08	4.01909e-07	FBgn0035608
CG15211	-1.59912	7.05737	4.5895e-18	2.76598e-16			CG13250	-2.47947	0.477417	2.97477e-08	7.09e-07	FBgn0037013
fa2h	-2.9444	4.40233	7.67328e-18	4.59523e-16			CG18234	-2.4758	0.418857	3.1705e-08	7.49983e-07	FBgn0265268
to	-1.77289	11.0616	9.07587e-18	5.401e-16			CR46218	-2.1156	2.83172	4.1006e-08	9.50415e-07	FBgn0267938
Vmat	1.54665	7.71013	1.57456e-17	9.31154e-16			CG4409	-2.61006	0.18663	4.24192e-08	9.78953e-07	FBgn0034128
GABA-B-R1	-1.50471	7.0279	4.44701e-17	2.61352e-15			lin-28	-2.85251	-0.243953	6.29392e-08	1.41121e-06	FBgn0035626
CG8300	-1.6495	6.47944	1.02926e-16	6.01166e-15			Obp83cd	-2.07041	1.72322	9.77157e-08	2.12061e-06	FBgn0046878
Jheh3	-1.99745	6.47954	1.31058e-16	7.60777e-15			dy	-2.55632	0.298429	1.11437e-07	2.39641e-06	FBgn0004511
Pde6	-1.48514	7.10031	2.17362e-16	1.25407e-14			CG34166	-3.70197	2.92494	1.66412e-07	3.43048e-06	FBgn0085195
CG10336	3.61783	3.16889	2.37368e-16	1.3612e-14			CarT	-2.35983	0.50942	3.01942e-07	5.84249e-06	FBgn0032879
CG17599	-1.68547	6.1768	2.73541e-16	1.55918e-14			CG15829	-2.00521	2.81007	3.08872e-07	5.95882e-06	FBgn0035743
CG30271	-1.36534	7.52356	3.86959e-16	2.19246e-14			CR44043	-2.31482	0.30469	3.25889e-07	6.24203e-06	FBgn0264835
tut	2.89309	3.06693	4.6393e-16	2.61292e-14			Gr43a	-2.42337	0.0288616	3.37466e-07	6.42475e-06	FBgn0041243
CG16798	3.77352	1.95732	8.28917e-16	4.64095e-14			E(spl)m7-HLH	-2.48014	0.378735	3.75192e-07	7.05285e-06	FBgn0002633
Cyp6a9	2.06318	5.85174	8.38125e-16	4.6649e-14			Gr64a	-2.08752	1.0587	3.7642e-07	7.05285e-06	FBgn0045479
CG1227	1.70324	6.60366	9.83388e-16	5.44141e-14			CG11425	-2.07079	3.36202	3.78884e-07	7.07932e-06	FBgn0037167
boss	-1.56946	6.41342	1.27576e-15	7.01814e-14			CG31097	-2.49938	0.00432729	4.20997e-07	7.69011e-06	FBgn0051097
CG13578	-1.45378	7.32804	1.5892e-15	8.69194e-14			beat-IIa	-2.18712	1.20463	4.52332e-07	8.15232e-06	FBgn0038498
CG8083	-3.14912	2.02067	1.91163e-15	1.03953e-13			Def	-2.31852	1.23718	4.61933e-07	8.29376e-06	FBgn0010385
CR43170	2.95397	2.47841	1.95732e-15	1.05829e-13			prom	-2.06741	0.618695	1.00214e-06	1.70237e-05	FBgn0259210
CG15201	1.36935	7.64021	2.38628e-15	1.2829e-13			CG31644	-2.28555	0.214596	1.10568e-06	1.87155e-05	FBgn0051644
Tsp29Fa	-1.74158	6.05865	2.74951e-15	1.46982e-13			CR46245	-2.06365	0.921575	1.62397e-06	2.6677e-05	FBgn0267965
CG17324	2.48694	4.68652	2.95669e-15	1.5717e-13			CCHa1-R	-2.0576	0.872483	2.32184e-06	3.71101e-05	FBgn0050106
CAH2	1.30801	10.8412	3.28858e-15	1.73835e-13			snoRNA:2R:9445205	-2.30789	-0.153197	2.64794e-06	4.16855e-05	FBgn0263472
Or47a	-7.39013	5.70998	3.61835e-15	1.90205e-13			CG10730	-2.26526	0.315711	3.20938e-06	4.97007e-05	FBgn0032843
Hsp26	2.8706	4.65733	4.81005e-15	2.51452e-13			CR43476	-2.06629	0.272214	3.54666e-06	5.43898e-05	FBgn0263453
Gr93a	-3.31758	1.83163	6.25247e-15	3.2506e-13			CR45290	-2.22314	0.241048	4.03306e-06	6.07613e-05	FBgn0266828
CG10126	-1.36681	8.61555	7.60704e-15	3.93321e-13			hdm	-2.01823	0.302648	4.03919e-06	6.07613e-05	FBgn0029977
Frq1	-1.53271	6.765	8.86818e-15	4.56037e-13			antr	-2.20525	-0.0562244	4.08671e-06	6.13785e-05	FBgn0050488
ppk5	-3.01362	3.13408	1.04126e-14	5.32565e-13			CG12483	-2.23716	5.77456	2.54088e-05	0.000311423	FBgn0040688
CG32444	1.60239	6.80035	1.20995e-14	6.15515e-13			Amy-d	-2.92651	2.15443	9.41717e-05	0.000965579	FBgn0000078
CG10035	-2.48076	4.42121	1.84692e-14	9.34519e-13			Amy-p	-2.90925	2.41388	0.000259675	0.00229014	FBgn0000079
CG13558	3.8735	1.22764	1.93172e-14	9.7223e-13
CG13386	3.11541	2.8422	2.03233e-14	1.01745e-12
CR45042	-4.79314	-0.0679517	2.28244e-14	1.13665e-12
Lgr1	-2.34841	4.57786	2.81817e-14	1.3961e-12
btd	-2.74552	3.45777	3.77952e-14	1.86259e-12
Drip	1.4233	7.25752	4.18176e-14	2.05015e-12
Tsf1	1.51087	9.97713	4.50491e-14	2.19719e-12
CR44525	-3.85231	0.607586	4.63413e-14	2.24862e-12
Cpr47Ea	-2.83773	2.21375	5.55711e-14	2.68272e-12
Su(H)	-1.66946	6.86606	5.73434e-14	2.75423e-12
fabp	-1.44598	6.40028	6.31294e-14	3.01682e-12
Spn42De	4.1957	0.00615239	6.82774e-14	3.24643e-12
Idgf6	1.31494	8.35939	1.16418e-13	5.50773e-12
CG13950	1.25313	7.99327	1.43216e-13	6.74186e-12
sNPF	-1.37889	7.2671	1.76837e-13	8.2833e-12
5-HT2A	-2.03899	5.19922	1.85258e-13	8.63504e-12
Rh4	2.89267	1.46704	1.96863e-13	9.13096e-12
Ccp84Ac	-4.84332	-0.0131869	2.2321e-13	1.02929e-11
pHCl	-1.44449	7.01051	2.24091e-13	1.02929e-11
CG32137	-1.26454	7.76897	2.48472e-13	1.13577e-11
ppk14	-3.93661	0.407175	2.77092e-13	1.2605e-11
GstE1	1.60191	6.12958	2.84633e-13	1.28861e-11
CG14692	-1.22363	8.3861	3.47701e-13	1.56664e-11
fid	-1.37216	6.60067	4.14921e-13	1.86065e-11
mthl3	2.57032	2.7812	4.42126e-13	1.9733e-11
Cyp4p2	-2.67553	2.73781	6.22656e-13	2.76599e-11
Krn	-1.47659	6.01674	7.19816e-13	3.18266e-11
CR43498	-4.72279	-0.114655	7.84457e-13	3.45234e-11
Cpr64Ac	1.58596	6.33365	8.13665e-13	3.5643e-11
Obp83a	-8.18975	13.4078	9.01834e-13	3.93233e-11
Tep4	1.33058	8.53454	9.25351e-13	4.0135e-11
CG15666	-1.27936	7.27319	9.28933e-13	4.0135e-11
CG32104	-1.94994	5.88839	9.97442e-13	4.28991e-11
CG32271	-1.6242	6.65338	1.02104e-12	4.37152e-11
CG32333	-1.63761	5.73829	1.19551e-12	5.09545e-11
BBS4	-1.33253	6.73112	1.25979e-12	5.34536e-11
Cyp6a19	3.97004	0.000882369	1.29999e-12	5.49129e-11
5-HT2B	-2.17171	4.46536	1.35179e-12	5.68473e-11
Sirup	1.47679	6.82815	1.45257e-12	6.08151e-11
GstE7	-1.39678	6.54766	1.789e-12	7.45705e-11
Slob	-1.19955	8.11746	1.80441e-12	7.4883e-11
CG14247	3.00768	1.06097	2.07287e-12	8.56484e-11
Syngr	-1.26002	7.19677	2.12382e-12	8.73722e-11
ADPS	-1.47298	6.01749	2.33537e-12	9.56593e-11
Gld	2.35371	4.15904	2.70564e-12	1.10348e-10
cDIP	-1.32487	7.42587	2.95302e-12	1.1992e-10
RSG7	-1.26504	6.8606	3.26711e-12	1.32108e-10
CG30356	-2.54586	2.35458	3.28723e-12	1.32357e-10
Mal-B1	1.66263	5.98583	3.50003e-12	1.40327e-10
CG10936	-1.61244	5.89617	3.6736e-12	1.46273e-10
CR44285	-4.45941	-0.348561	3.67923e-12	1.46273e-10
Mur89F	3.43081	1.57118	3.86446e-12	1.52994e-10
link	-3.08825	1.10898	4.2395e-12	1.67142e-10
7B2	-1.22975	8.00873	5.23142e-12	2.05393e-10
CG14661	-1.2568	11.8458	5.44574e-12	2.12924e-10
CR32111	2.71467	1.48155	7.08768e-12	2.75982e-10
GstZ2	1.60918	6.6635	8.08567e-12	3.13552e-10
CG6123	-3.13407	1.43493	8.25729e-12	3.189e-10
Ady43A	1.26112	6.80936	9.75587e-12	3.75244e-10
Obp83b	-8.17844	12.8449	9.89641e-12	3.79109e-10
twit	1.22694	6.81026	1.06319e-11	4.05641e-10
Mvl	-1.22936	6.89032	1.1182e-11	4.24916e-10
Gat	-2.14104	4.86935	1.15991e-11	4.39004e-10
Oseg2	-1.31382	6.43947	1.2283e-11	4.63034e-10
beat-Ia	-2.43279	3.47105	1.27382e-11	4.7829e-10
smog	-1.40561	6.38531	1.28059e-11	4.78932e-10
CG13133	1.13492	9.29027	1.38818e-11	5.17123e-10
Cpr67B	1.17511	9.66209	1.44189e-11	5.35028e-10
acj6	-1.58411	5.56749	1.5203e-11	5.61916e-10
CG31221	-1.21129	9.05147	1.98196e-11	7.297e-10
CG8861	2.73997	1.71665	2.05762e-11	7.54618e-10
CG40485	-3.00436	0.993471	2.13996e-11	7.81787e-10
CG12885	-1.23505	6.74612	2.16363e-11	7.87395e-10
CG32447	-2.55524	3.82023	2.5511e-11	9.24847e-10
CG11191	-1.15456	8.26809	2.56255e-11	9.25453e-10
nAChRbeta1	2.49103	1.95751	2.61065e-11	9.39237e-10
CG6282	-1.27005	6.72756	2.65801e-11	9.52654e-10
CG14694	2.29944	4.89695	2.78668e-11	9.95001e-10
CG13928	-1.10316	8.43014	2.90358e-11	1.03285e-09
pst	1.12632	8.29235	3.13207e-11	1.10995e-09
Ude	-1.443	6.24818	3.77502e-11	1.33281e-09
Epac	-1.47539	5.71185	4.39974e-11	1.5476e-09
CG30203	1.60569	5.23682	4.42183e-11	1.5496e-09
ssp6	-1.89873	4.68849	4.68222e-11	1.6348e-09
nSyb	-1.11228	9.54744	5.12682e-11	1.78345e-09
CG4928	-1.13272	9.75012	6.8686e-11	2.38061e-09
form3	1.16162	7.39816	7.02661e-11	2.42649e-09
CG1358	-1.14434	7.34754	7.13771e-11	2.45589e-09
Gdap1	-1.62393	5.47304	7.67112e-11	2.62986e-09
CG43165	-3.15027	1.76698	9.35399e-11	3.19521e-09
CG3556	-1.07394	9.08186	1.04896e-10	3.57025e-09
Mdr49	1.61555	5.45283	1.09259e-10	3.70539e-09
CG14142	1.1386	9.53119	1.19291e-10	4.03118e-09
noe	-1.13419	8.30873	1.38984e-10	4.67995e-09
CG42806	-1.40146	5.82881	1.64163e-10	5.50818e-09
Spn88Eb	3.3495	0.381208	1.69456e-10	5.66571e-09
Tsp39D	-1.17649	6.96301	1.78325e-10	5.94124e-09
CR45320	-2.95877	0.93921	1.83639e-10	6.09681e-09
Cht5	2.44256	1.52116	2.05013e-10	6.78263e-09
Drsl5	1.11067	12.8136	2.13619e-10	7.04273e-09
CR30009	-2.62985	1.23548	2.28432e-10	7.50493e-09
TrissinR	-1.54251	5.24361	2.48603e-10	8.13939e-09
Cpr65Au	1.09218	9.85711	2.69341e-10	8.78794e-09
Fer1	-1.12391	7.2171	2.81222e-10	9.14407e-09
CG4721	1.10146	7.55981	3.14932e-10	1.02051e-08
CG34456	1.57614	5.93161	3.19254e-10	1.03098e-08
Hml	1.60655	5.6153	3.45242e-10	1.11111e-08
CG17279	1.14321	8.52839	3.60594e-10	1.15659e-08
CG8086	1.08088	9.51377	3.97163e-10	1.26814e-08
CG2065	-1.07164	7.54525	3.98052e-10	1.26814e-08
CG43149	1.04087	7.6403	4.05042e-10	1.28608e-08
CG7966	1.33572	6.09895	4.62832e-10	1.46465e-08
fok	1.08357	8.02618	5.73412e-10	1.80854e-08
CG7236	-1.09201	7.25749	6.23259e-10	1.95923e-08
CG12672	-2.2571	2.4517	6.78357e-10	2.12537e-08
nerfin-2	-2.35597	2.73263	8.20676e-10	2.56278e-08
CG4199	-1.02346	7.63461	8.26837e-10	2.57353e-08
Tep2	1.39608	5.7009	8.81707e-10	2.73326e-08
dysc	-1.14374	6.78956	8.83934e-10	2.73326e-08
sosie	1.02308	7.72832	8.90112e-10	2.7434e-08
Or42b	-7.52694	6.41697	9.10139e-10	2.79602e-08
CG42329	2.24241	3.87153	9.20731e-10	2.8194e-08
CG34227	2.9108	0.826542	9.43692e-10	2.88039e-08
Osi17	-2.81928	0.902875	9.5527e-10	2.90635e-08
krimp	2.29756	2.18002	1.03121e-09	3.12733e-08
CG10357	1.11914	9.54966	1.04558e-09	3.16078e-08
CG17732	-2.75893	2.22091	1.06163e-09	3.19201e-08
CG14445	1.0701	8.87492	1.06265e-09	3.19201e-08
CG13437	-1.60025	5.01629	1.17512e-09	3.51866e-08
CG6908	-1.1176	9.43083	1.18381e-09	3.5335e-08
Cyp9b1	-1.23031	6.22951	1.19717e-09	3.56214e-08
SP2353	-1.01679	9.34827	1.2593e-09	3.73527e-08
CG10874	-1.53801	5.16845	1.35607e-09	4.00973e-08
SPE	1.07146	7.68552	1.44722e-09	4.26592e-08
GNBP3	1.25154	6.06935	1.4702e-09	4.3202e-08
CG43236	2.85306	0.416857	1.49047e-09	4.36619e-08
CG33178	-1.99745	3.97807	1.74628e-09	5.09977e-08
mthl4	2.21498	2.71498	1.7697e-09	5.14746e-08
IFT52	-1.2915	5.99222	1.77349e-09	5.14746e-08
CG8665	2.24067	2.59685	1.87534e-09	5.42644e-08
CG13694	-2.3948	1.45621	2.06295e-09	5.95111e-08
trp	-2.28583	1.59987	2.12174e-09	6.09761e-08
CG32006	-1.15928	6.77627	2.12662e-09	6.09761e-08
CG34120	-1.00784	9.62984	2.52195e-09	7.20926e-08
CG3259	-1.35555	5.62352	2.54301e-09	7.24757e-08
Tim17a2	2.90351	0.624748	2.59591e-09	7.37614e-08
Idgf2	1.03514	7.96106	2.71026e-09	7.678e-08
bru2	-1.00107	7.60792	3.06416e-09	8.64525e-08
CR44237	-3.33663	-0.274829	3.06997e-09	8.64525e-08
CG8641	-1.69756	4.73915	3.08883e-09	8.67257e-08
CG42808	1.20565	7.4085	3.14589e-09	8.78494e-08
CG4757	1.47858	10.014	3.14743e-09	8.78494e-08
CG30259	1.3597	5.61839	3.85975e-09	1.07415e-07
CG9701	1.41786	5.30232	4.07318e-09	1.13022e-07
jhamt	-1.65132	5.17375	4.15144e-09	1.14857e-07
CG4302	-1.23207	6.04063	4.1911e-09	1.15616e-07
Scp2	1.62508	4.8518	4.29605e-09	1.18166e-07
SelR	1.084	6.68715	4.32642e-09	1.18657e-07
CG2816	2.1183	2.09569	4.4063e-09	1.20498e-07
phyl	-1.14892	6.38468	4.629e-09	1.26224e-07
slp2	-1.82856	4.20571	4.64919e-09	1.2641e-07
Dat	1.01411	7.93269	5.20699e-09	1.41171e-07
CG10031	1.00978	7.49501	5.48337e-09	1.48239e-07
CG9519	-1.18457	6.88773	5.69482e-09	1.53517e-07
CG6421	1.10866	7.2187	6.12752e-09	1.64712e-07
Tsp42Er	2.10099	2.1142	6.58099e-09	1.7617e-07
Naam	0.986465	9.52987	6.59103e-09	1.7617e-07
LanA	1.60524	4.96646	6.66468e-09	1.77637e-07
eyg	-1.22954	5.85156	7.10506e-09	1.88843e-07
CR44850	-2.44712	1.7765	7.17809e-09	1.9025e-07
CG11200	1.12278	6.67889	7.29621e-09	1.9284e-07
CR44317	-2.26177	3.75105	7.59893e-09	2.00282e-07
CG10185	1.05962	9.55017	7.77374e-09	2.0432e-07
CG6409	1.00873	14.3478	8.0182e-09	2.10161e-07
CG31199	1.11092	7.74164	8.28902e-09	2.16659e-07
CG43324	-1.52709	5.17152	9.96621e-09	2.5978e-07
CrzR	1.23023	6.18145	1.03076e-08	2.6794e-07
CG18467	2.51947	0.429279	1.05994e-08	2.7477e-07
CG11407	-1.19305	9.4396	1.10581e-08	2.8588e-07
CG5835	1.12328	6.4795	1.1488e-08	2.96183e-07
CG9689	1.97944	3.61261	1.15423e-08	2.96775e-07
aurB	6.49344	2.70491	1.19634e-08	3.06769e-07
CR45835	2.43324	0.626023	1.21451e-08	3.10587e-07
CG34445	1.98062	2.35684	1.24115e-08	3.16543e-07
CG10650	-1.94425	3.66018	1.25605e-08	3.19484e-07
antdh	-1.00102	11.946	1.28075e-08	3.24891e-07
CG34136	1.3626	5.56665	1.31682e-08	3.33148e-07
CG15414	2.16783	2.89303	1.37727e-08	3.47513e-07
CG9413	-0.988516	7.61362	1.43115e-08	3.60149e-07
hgo	1.65883	6.0045	1.4768e-08	3.70649e-07
CR43856	-2.05294	1.87931	1.48266e-08	3.71135e-07
blanks	-2.11602	1.95436	1.60984e-08	4.01909e-07
SPARC	0.971968	7.93085	1.6604e-08	4.12999e-07
Cyp4e2	-1.12385	9.70935	1.66299e-08	4.12999e-07
CG13606	-1.94339	2.96021	1.68634e-08	4.177e-07
Cyp6a17	-1.29988	6.10233	1.70694e-08	4.21698e-07
CG32668	-1.14738	6.01676	1.76979e-08	4.36086e-07
CG3940	1.05159	6.86671	1.77812e-08	4.37003e-07
CR43086	2.37063	2.22308	1.829e-08	4.48342e-07
ASPP	-0.990096	7.34284	1.9074e-08	4.66352e-07
Hr83	2.86083	0.769192	2.12576e-08	5.184e-07
Idgf4	0.947129	11.3	2.20183e-08	5.35571e-07
CG1143	1.16586	6.25339	2.3856e-08	5.78784e-07
bnb	1.06877	7.18256	2.46152e-08	5.95674e-07
CG17386	1.09771	6.45684	2.5383e-08	6.12689e-07
CG11000	-1.77686	4.33161	2.55826e-08	6.15934e-07
CR45955	2.06617	1.94919	2.65433e-08	6.37445e-07
CR44646	2.83536	-0.15734	2.75242e-08	6.59326e-07
Obp57b	1.09177	7.35706	2.86518e-08	6.84605e-07
CG13250	-2.47947	0.477417	2.97477e-08	7.09e-07
CG43646	-1.79702	4.12828	3.03463e-08	7.21448e-07
CG4000	1.27562	6.55689	3.06474e-08	7.26781e-07
CG18234	-2.4758	0.418857	3.1705e-08	7.49983e-07
E5	1.34566	5.24783	3.20233e-08	7.55621e-07
CG8909	-1.96708	2.63933	3.48518e-08	8.20318e-07
CG9649	1.2276	6.2151	3.5967e-08	8.44465e-07
Lsd-1	-1.72379	4.54483	3.68276e-08	8.62531e-07
CG11841	1.38031	5.17137	3.88494e-08	9.07637e-07
Sox15	-1.08842	6.2049	4.01107e-08	9.32642e-07
CG4570	8.02974	4.38524	4.01168e-08	9.32642e-07
CR46218	-2.1156	2.83172	4.1006e-08	9.50415e-07
Obp44a	1.08334	6.56267	4.10822e-08	9.50415e-07
CG4409	-2.61006	0.18663	4.24192e-08	9.78953e-07
CG5945	0.905679	10.8636	4.35591e-08	1.00281e-06
CCKLR-17D1	-1.02734	7.82244	4.3708e-08	1.0038e-06
Cyp313a1	0.91633	10.0268	4.50569e-08	1.03227e-06
CG4927	2.32073	1.02294	4.58172e-08	1.04716e-06
TwdlT	2.07444	1.83413	4.64295e-08	1.05859e-06
Tsp	1.48561	5.17299	4.67933e-08	1.06303e-06
BBS8	-1.12996	6.06607	4.68489e-08	1.06303e-06
tRNA:Leu-AAG-1-4	1.98786	1.74517	4.78889e-08	1.08403e-06
CG31200	0.959736	8.11652	4.80268e-08	1.08456e-06
Kif3C	-1.59268	4.62475	4.87622e-08	1.09854e-06
miple2	1.85973	2.91964	6.25944e-08	1.40681e-06
lin-28	-2.85251	-0.243953	6.29392e-08	1.41121e-06
CG15209	1.44831	4.87874	6.7963e-08	1.52025e-06
CG10237	-0.961606	10.3364	7.24934e-08	1.61776e-06
CR46254	2.52217	0.224831	7.8192e-08	1.74083e-06
CR46136	-1.95756	2.00756	8.4001e-08	1.86577e-06
CG6357	0.922185	9.26059	8.50422e-08	1.88447e-06
PsGEF	-1.00138	7.05976	8.93025e-08	1.97256e-06
CG46025	1.09002	6.03859	8.94814e-08	1.97256e-06
CG32547	-1.4103	5.00296	8.9643e-08	1.97256e-06
CG30424	2.54405	0.596074	9.48681e-08	2.0827e-06
CG42821	1.92241	5.30557	9.52549e-08	2.0841e-06
CG15096	-1.14559	6.01525	9.53727e-08	2.0841e-06
CG8303	1.1828	6.97039	9.56058e-08	2.08438e-06
CG17778	-1.01059	6.69549	9.75222e-08	2.12061e-06
Obp83cd	-2.07041	1.72322	9.77157e-08	2.12061e-06
Nost	1.38108	5.05332	1.01311e-07	2.19361e-06
AdamTS-A	1.15978	5.70301	1.04249e-07	2.25206e-06
TrpA1	1.9169	2.65027	1.07125e-07	2.30891e-06
dy	-2.55632	0.298429	1.11437e-07	2.39641e-06
CG14984	1.16936	5.93298	1.15736e-07	2.48321e-06
s-cup	-0.920106	7.36104	1.16717e-07	2.49859e-06
CG13202	1.91134	2.14588	1.19335e-07	2.54886e-06
Cyp12e1	1.60125	4.46987	1.24188e-07	2.64283e-06
CG2145	1.33919	5.10826	1.24293e-07	2.64283e-06
CG33110	1.04998	6.81169	1.24667e-07	2.64484e-06
Cpr92F	1.86357	2.04009	1.25928e-07	2.66561e-06
IA-2	-0.887391	8.61159	1.32349e-07	2.79528e-06
Appl	-0.883326	9.86772	1.35649e-07	2.85861e-06
CG1126	-1.0911	6.13737	1.38377e-07	2.90961e-06
GstE5	-0.952794	7.01179	1.45771e-07	3.05829e-06
CG13251	-1.0454	6.21649	1.46797e-07	3.07299e-06
CG11796	1.68182	7.95948	1.53858e-07	3.21299e-06
Cby	-1.573	4.48919	1.54164e-07	3.21299e-06
CG1695	-1.0657	6.10487	1.5982e-07	3.32356e-06
CG2157	1.17797	6.21097	1.61032e-07	3.34141e-06
CG33143	-1.08148	6.36158	1.63655e-07	3.38753e-06
CG18130	1.0194	6.29224	1.6397e-07	3.38753e-06
CG34166	-3.70197	2.92494	1.66412e-07	3.43048e-06
CG14219	2.45567	0.0319826	1.70363e-07	3.50429e-06
CG32260	1.65837	4.49931	1.79843e-07	3.69126e-06
CG4133	-1.21447	5.47848	1.80551e-07	3.69429e-06
CG31760	-1.75474	3.42308	1.80771e-07	3.69429e-06
CG6495	-1.02607	6.22165	1.81944e-07	3.71024e-06
CG13500	2.40798	0.0540343	2.0178e-07	4.10589e-06
CG17350	1.41155	5.00589	2.04756e-07	4.1575e-06
CG7742	1.01939	6.40293	2.08594e-07	4.22637e-06
Hn	1.02839	6.92249	2.11588e-07	4.27788e-06
fax	1.24992	7.50318	2.15156e-07	4.34073e-06
CG42321	-0.860205	8.45681	2.17337e-07	4.37169e-06
ems	1.1191	5.78646	2.17614e-07	4.37169e-06
CG11951	1.20093	6.2334	2.2386e-07	4.48763e-06
CG3009	0.973655	6.63272	2.26052e-07	4.522e-06
peb	-1.03128	6.16308	2.42789e-07	4.84656e-06
Mdh1	-1.02801	8.15473	2.45222e-07	4.88483e-06
Atet	-0.904468	7.85654	2.58593e-07	5.14035e-06
CG42390	0.94091	7.9863	2.61713e-07	5.19147e-06
Incenp	7.54155	4.42575	2.67569e-07	5.29653e-06
sas	1.01594	6.48726	2.71655e-07	5.36617e-06
CG9452	-1.0169	7.74428	2.74506e-07	5.40487e-06
CG14105	1.51998	4.79993	2.74811e-07	5.40487e-06
H15	-1.08183	6.07878	2.75327e-07	5.40487e-06
CG17018	4.14516	4.47268	2.77213e-07	5.43061e-06
CG1441	0.955533	6.80567	2.78299e-07	5.44063e-06
Spn42Dd	1.17256	5.67226	2.93081e-07	5.7178e-06
GstS1	1.18068	6.93708	2.9797e-07	5.79934e-06
CCHa2-R	2.00912	1.30912	2.98486e-07	5.79934e-06
uzip	-0.883645	8.54012	3.01769e-07	5.84249e-06
CarT	-2.35983	0.50942	3.01942e-07	5.84249e-06
CG15829	-2.00521	2.81007	3.08872e-07	5.95882e-06
vvl	1.23968	5.49427	3.09214e-07	5.95882e-06
CG1927	-0.87836	9.84157	3.10453e-07	5.97053e-06
CG33993	1.8239	2.07055	3.25094e-07	6.23944e-06
CR44043	-2.31482	0.30469	3.25889e-07	6.24203e-06
CG5535	1.14738	5.73771	3.27382e-07	6.25796e-06
CG6739	1.69803	2.6238	3.34664e-07	6.38425e-06
Gr43a	-2.42337	0.0288616	3.37466e-07	6.42475e-06
Eaat1	0.963882	6.87382	3.42152e-07	6.50088e-06
CG8654	-1.54085	4.53804	3.43093e-07	6.50571e-06
CG7724	0.953675	7.62695	3.49441e-07	6.61283e-06
CG6435	1.00124	6.55461	3.59882e-07	6.79681e-06
E(spl)m7-HLH	-2.48014	0.378735	3.75192e-07	7.05285e-06
rut	-0.87121	7.86456	3.75441e-07	7.05285e-06
spirit	1.27222	5.22275	3.7631e-07	7.05285e-06
Gr64a	-2.08752	1.0587	3.7642e-07	7.05285e-06
CG11425	-2.07079	3.36202	3.78884e-07	7.07932e-06
CG7201	1.87565	2.5675	3.7933e-07	7.07932e-06
CG9947	-0.854268	7.42451	3.80094e-07	7.07963e-06
CG15628	1.02428	8.04079	3.84309e-07	7.14408e-06
CG5397	0.9064	8.48171	3.91589e-07	7.25624e-06
rad	-1.7182	3.77149	3.91877e-07	7.25624e-06
CG45105	0.969954	6.60458	3.93114e-07	7.26075e-06
CG9572	1.1404	7.39358	3.93655e-07	7.26075e-06
squ	5.39307	3.56319	3.98791e-07	7.34116e-06
CG42322	-0.893179	7.56785	4.12066e-07	7.57081e-06
Mal-A5	2.17519	4.49178	4.17954e-07	7.65692e-06
Vha13	-0.861455	9.2898	4.18371e-07	7.65692e-06
CG31097	-2.49938	0.00432729	4.20997e-07	7.69011e-06
CR43650	2.00761	1.20595	4.26597e-07	7.77738e-06
Spn85F	2.64332	-0.334214	4.30862e-07	7.84004e-06
CG8539	-1.22389	5.57393	4.34472e-07	7.89054e-06
Cyp6a23	1.33186	5.44431	4.36632e-07	7.91458e-06
Ser	2.27265	0.710525	4.42953e-07	8.01381e-06
CG3746	1.82229	2.7335	4.48819e-07	8.10443e-06
beat-IIa	-2.18712	1.20463	4.52332e-07	8.15232e-06
CG32809	-1.02713	6.54536	4.54728e-07	8.17991e-06
Def	-2.31852	1.23718	4.61933e-07	8.29376e-06
Dhc93AB	0.875204	8.0002	4.66517e-07	8.36019e-06
CG1513	-0.850056	8.44711	4.71319e-07	8.43028e-06
CG11854	-1.68694	4.56484	4.98916e-07	8.90706e-06
bdl	0.841269	8.41307	5.02349e-07	8.95146e-06
Dh44-R1	-1.63255	3.85602	5.09569e-07	9.06305e-06
NijC	-1.11398	5.72606	5.38263e-07	9.55544e-06
chrb	-0.85975	8.70773	5.47742e-07	9.7055e-06
Tdc1	-1.82214	3.10734	5.5123e-07	9.74904e-06
PGRP-SD	1.87247	6.04582	5.53735e-07	9.77508e-06
ine	0.833944	7.61048	5.96736e-07	1.05146e-05
plx	-0.843615	9.1469	6.35882e-07	1.11835e-05
Gfrl	-0.880022	6.97031	6.69201e-07	1.17477e-05
retm	-0.916917	7.13576	6.96051e-07	1.21964e-05
Obp84a	1.01483	6.94749	7.06816e-07	1.23621e-05
CG13101	-1.16421	5.91211	7.08409e-07	1.23671e-05
BBS1	-1.66053	3.56624	7.12027e-07	1.24074e-05
CG3812	-1.1917	5.44015	7.1769e-07	1.24831e-05
sv	-0.983252	6.22739	7.2689e-07	1.26199e-05
CG7589	1.52004	4.24287	7.37563e-07	1.27817e-05
CG14762	-0.843475	7.59468	7.77807e-07	1.34545e-05
Obp8a	1.61659	4.1075	7.82326e-07	1.3508e-05
Dh31-R	-1.65081	3.64725	7.92589e-07	1.36603e-05
sev	0.878969	6.89317	8.15008e-07	1.40211e-05
CG10062	0.889953	6.92127	8.1808e-07	1.40484e-05
mmd	1.37101	4.76808	8.57743e-07	1.47028e-05
toe	-0.97284	6.29826	8.60337e-07	1.47206e-05
PPO1	2.67121	3.25223	9.14666e-07	1.5622e-05
CG10553	-0.831552	7.69607	9.19469e-07	1.56757e-05
CG14259	0.872802	7.49414	9.54374e-07	1.62415e-05
prom	-2.06741	0.618695	1.00214e-06	1.70237e-05
CR42646	2.31102	0.210914	1.07364e-06	1.82057e-05
CG31644	-2.28555	0.214596	1.10568e-06	1.87155e-05
Cht7	1.96646	1.13598	1.13491e-06	1.9176e-05
CG31103	0.907525	6.8329	1.17071e-06	1.97456e-05
CG6429	0.946896	6.77612	1.28536e-06	2.16407e-05
CG32032	0.827636	7.84769	1.31025e-06	2.20206e-05
CG9328	1.25822	5.69716	1.34386e-06	2.25129e-05
TpnC25D	1.09444	6.02494	1.3443e-06	2.25129e-05
Men	-0.794893	9.25444	1.35009e-06	2.257e-05
wat	1.52462	6.62694	1.37178e-06	2.2892e-05
sns	-1.60078	3.63127	1.40413e-06	2.33906e-05
Ir60a	1.55892	3.98262	1.42356e-06	2.36727e-05
how	0.868097	7.02541	1.47202e-06	2.44356e-05
comm3	1.32271	4.92044	1.48269e-06	2.45695e-05
MFS14	-0.864393	6.96785	1.54199e-06	2.55075e-05
CG6870	1.85527	1.93377	1.5836e-06	2.61502e-05
CG5895	0.996235	6.20332	1.60024e-06	2.63789e-05
nxf2	2.86291	3.03817	1.6087e-06	2.64722e-05
CR46245	-2.06365	0.921575	1.62397e-06	2.6677e-05
CG34355	1.67818	3.39676	1.70324e-06	2.79307e-05
CG7214	1.50986	5.23327	1.70678e-06	2.79404e-05
CG10339	0.954995	6.16984	1.73865e-06	2.8413e-05
snoRNA:2R:9445410	-1.80478	1.33454	1.78528e-06	2.91247e-05
CG17777	2.36455	2.62115	1.79615e-06	2.92515e-05
CG9384	-0.877648	6.87115	1.85975e-06	3.02353e-05
qin	1.99274	2.96373	1.87652e-06	3.04556e-05
amon	-0.848486	6.97625	1.95103e-06	3.16107e-05
yellow-e	1.21069	5.46623	1.96666e-06	3.18095e-05
Pen	5.02269	4.04712	1.99751e-06	3.22533e-05
Oseg6	-1.01157	5.79497	2.10859e-06	3.3989e-05
CG7016	1.40573	4.49119	2.19713e-06	3.53558e-05
CG3301	0.927694	6.52316	2.20999e-06	3.55025e-05
CG3168	0.797516	8.25022	2.25308e-06	3.61333e-05
aPKC	1.01393	6.57115	2.27317e-06	3.63939e-05
CCHa1-R	-2.0576	0.872483	2.32184e-06	3.71101e-05
Vha16-1	-0.78651	10.8711	2.32632e-06	3.71191e-05
CG17549	0.891079	8.30546	2.3587e-06	3.75724e-05
CG12869	1.77276	1.48756	2.38306e-06	3.78966e-05
ZnT41F	1.37905	4.55738	2.45038e-06	3.88622e-05
CG42675	-0.833441	7.02075	2.45199e-06	3.88622e-05
CG5191	-0.815654	7.17238	2.46207e-06	3.89567e-05
dnr1	-0.77792	7.58367	2.5438e-06	4.01826e-05
brk	-1.67106	2.93409	2.57741e-06	4.06458e-05
snoRNA:2R:9445205	-2.30789	-0.153197	2.64794e-06	4.16855e-05
CG5162	0.944692	6.07452	2.65215e-06	4.16855e-05
CG5390	0.79126	7.77716	2.71679e-06	4.26306e-05
CG30046	2.58784	1.91657	2.77669e-06	4.34983e-05
cib	0.926674	6.48055	2.86987e-06	4.48838e-05
CycB3	5.15078	5.73124	2.91794e-06	4.54862e-05
CG8180	0.9368	6.10145	2.918e-06	4.54862e-05
CR43700	-1.76033	1.67497	3.10607e-06	4.83383e-05
Chd64	0.963831	6.2854	3.11406e-06	4.8383e-05
CG13458	1.72234	2.796	3.12898e-06	4.8535e-05
CG10730	-2.26526	0.315711	3.20938e-06	4.97007e-05
Sema5c	1.49132	4.22806	3.23692e-06	5.00454e-05
CG34215	2.13552	1.93692	3.26526e-06	5.04012e-05
CG31189	1.13764	5.4857	3.44154e-06	5.30355e-05
jtb	-1.93261	3.68132	3.51845e-06	5.40457e-05
CG11453	-1.60977	3.28481	3.51851e-06	5.40457e-05
CR43476	-2.06629	0.272214	3.54666e-06	5.43898e-05
CG30082	1.99628	0.612617	3.57749e-06	5.46865e-05
CG5142	-0.949539	6.00801	3.57756e-06	5.46865e-05
Cyp4g15	0.843747	6.99498	3.59745e-06	5.49017e-05
Cyp305a1	1.39327	4.75175	3.79831e-06	5.78737e-05
Syt4	-0.791773	8.54611	3.87794e-06	5.89921e-05
CG15368	1.80204	2.00899	3.91276e-06	5.94262e-05
Pax	1.07214	7.36347	3.97816e-06	6.02619e-05
Drsl4	1.10916	5.91853	3.98052e-06	6.02619e-05
Ect4	0.878411	9.15434	3.99102e-06	6.03244e-05
CG13285	0.829264	7.2228	4.02721e-06	6.07613e-05
CR45290	-2.22314	0.241048	4.03306e-06	6.07613e-05
hdm	-2.01823	0.302648	4.03919e-06	6.07613e-05
antr	-2.20525	-0.0562244	4.08671e-06	6.13785e-05
CG30158	-1.57589	3.1646	4.09392e-06	6.13894e-05
CG44325	0.891089	6.55208	4.11634e-06	6.16279e-05
CG1673	2.07303	1.68684	4.13101e-06	6.17498e-05
CG13003	1.13009	5.24659	4.14041e-06	6.17927e-05
CG42822	2.30525	0.460623	4.22461e-06	6.295e-05
CG45057	1.45036	4.42465	4.25903e-06	6.33631e-05
CG9743	0.888463	6.46509	4.30577e-06	6.39579e-05
Ac76E	-0.861594	6.64252	4.32702e-06	6.41728e-05
CG8369	0.81651	12.3959	4.42213e-06	6.54808e-05
CG15161	-1.04842	5.66933	4.45259e-06	6.58288e-05
CG15529	1.57346	2.16829	4.46648e-06	6.59311e-05
CG14275	0.907181	6.37171	4.47361e-06	6.59335e-05
niki	-0.916199	6.14494	4.67875e-06	6.88497e-05
CG34219	-1.57791	2.40073	4.69231e-06	6.89419e-05
iav	0.870052	6.36058	4.72272e-06	6.92812e-05
gogo	-1.19369	4.91831	4.87732e-06	7.14384e-05
DptB	2.30747	1.36087	4.94955e-06	7.23842e-05
CG31769	0.949873	6.32457	5.09676e-06	7.44221e-05
Act87E	1.41543	8.17751	5.1201e-06	7.46477e-05
CG11317	0.901149	6.20691	5.12919e-06	7.46652e-05
CG14757	0.908213	6.60854	5.1539e-06	7.49097e-05
CR45115	1.57351	3.32858	5.21245e-06	7.56445e-05
CG4194	-1.69037	2.71908	5.22526e-06	7.57142e-05
ry	1.46426	4.11208	5.24207e-06	7.58417e-05
Non1	0.801875	8.79036	5.29385e-06	7.64739e-05
CG15203	0.772636	7.69407	5.31863e-06	7.67148e-05
CG14314	-1.02991	5.63251	5.35353e-06	7.70151e-05
Src42A	-0.761181	8.15253	5.35573e-06	7.70151e-05
CG7568	1.29151	4.65767	5.38701e-06	7.73474e-05
CG10116	1.55137	3.34576	5.45803e-06	7.82483e-05
CG14301	1.69467	1.37988	5.64996e-06	8.08773e-05
Obp57e	2.36739	0.434229	5.66066e-06	8.09081e-05
Cyp6w1	-0.861828	11.4944	5.69567e-06	8.12856e-05
N	1.15071	5.22343	5.7421e-06	8.18249e-05
CG7997	2.06997	2.91189	5.82501e-06	8.28816e-05
snoRNA:Psi28S-1153	-1.68976	1.66111	6.16574e-06	8.75979e-05
fend	3.31333	3.35495	6.24637e-06	8.85164e-05
LpR1	1.53499	4.2725	6.2491e-06	8.85164e-05
CG7381	-0.939461	6.33419	6.34235e-06	8.9703e-05
Gabat	0.823535	7.81921	6.63845e-06	9.37508e-05
Pde11	0.780034	7.58556	6.73713e-06	9.50025e-05
CG33144	-0.754504	7.41957	6.85418e-06	9.65094e-05
dpr9	-1.06402	5.39138	7.15678e-06	0.00010062
CG31674	-1.47482	3.35121	7.23502e-06	0.000101569
orb2	-0.819052	7.79391	7.30736e-06	0.000102215
CG9427	-1.48382	2.63659	7.31191e-06	0.000102215
Sep5	4.17392	1.95056	7.31345e-06	0.000102215
mol	2.40787	4.5513	7.44147e-06	0.000103851
Oamb	-0.955862	6.07277	7.59537e-06	0.000105843
Lmpt	0.778475	8.2912	7.72847e-06	0.000107539
CG33679	1.51964	3.64648	7.75013e-06	0.000107609
hoe1	0.742446	8.66749	7.75622e-06	0.000107609
CG14551	-1.86362	0.739642	7.77768e-06	0.000107749
mfas	0.766135	7.9995	7.80321e-06	0.000107944
Wnt2	-1.04062	5.58785	7.8489e-06	0.000108418
Cyp313a4	1.30056	4.99151	7.91198e-06	0.00010913
CG6071	-1.70099	1.27468	8.21312e-06	0.000113119
pncr017:3R	1.81138	0.719379	8.24793e-06	0.000113433
CG15202	0.816344	6.71728	8.33029e-06	0.000114399
CG15784	0.772621	7.13253	8.55527e-06	0.000117319
Fdh	0.854612	6.41273	9.21456e-06	0.000126177
CG15731	1.62709	1.63436	9.32064e-06	0.000127416
Vha68-2	-0.740267	10.1264	9.33202e-06	0.000127416
RhoGEF4	3.47638	3.01584	9.40591e-06	0.00012824
Cdc6	5.70533	4.01429	9.45352e-06	0.000128704
CG44247	-0.8113	6.70709	9.48154e-06	0.0001289
CG9812	0.943447	7.72041	9.67279e-06	0.000131311
CG43110	-1.32871	4.67836	9.75693e-06	0.000132239
CG1461	2.01689	2.88492	9.76909e-06	0.000132239
CG6765	-1.05503	5.4432	9.78704e-06	0.000132293
CG34325	0.948984	5.82788	9.98648e-06	0.000134796
Sodh-2	1.38052	4.03093	1.01024e-05	0.000136166
CR43671	2.18542	0.749552	1.01305e-05	0.000136255
Thor	1.2871	5.58322	1.01378e-05	0.000136255
CG7888	0.752166	7.81925	1.02094e-05	0.000137023
Pdk	0.760155	8.12711	1.0256e-05	0.000137454
CG13082	1.94331	0.387854	1.03387e-05	0.000138366
Hsc70-2	0.942412	5.81381	1.04477e-05	0.000139628
Adh	1.71458	2.0291	1.05123e-05	0.000140224
CG3777	1.60711	1.92242	1.0522e-05	0.000140224
CG15803	-0.880234	6.26096	1.05942e-05	0.000140988
CG7860	1.47824	3.18948	1.07155e-05	0.000142402
Hsp27	1.48438	3.15302	1.07499e-05	0.000142659
CG31028	1.64602	1.45767	1.08788e-05	0.000144167
Cpr62Bc	1.75352	0.836016	1.09577e-05	0.000145009
wisp	5.65882	4.20032	1.10265e-05	0.000145716
CG16700	0.971804	6.9933	1.10449e-05	0.000145755
CG5778	0.884447	6.86216	1.12987e-05	0.000148897
CG9400	1.00666	5.86081	1.14741e-05	0.000150998
CG2678	3.74272	1.86416	1.15275e-05	0.000151491
Faa	1.08028	5.4137	1.17451e-05	0.000154136
slo	-0.825904	7.90067	1.18553e-05	0.000155367
kek4	-1.5275	3.19683	1.19031e-05	0.000155778
exu	1.30652	4.40894	1.22572e-05	0.00016019
CG32512	2.99809	4.21808	1.23268e-05	0.000160878
Acsl	-0.751615	8.80864	1.24542e-05	0.000162316
fas	-1.46454	3.62716	1.25694e-05	0.000163593
vir-1	0.774478	10.8887	1.26911e-05	0.000164949
CG43737	-1.34426	4.18176	1.27683e-05	0.000165725
CG3714	0.726202	8.82828	1.28642e-05	0.000166741
GlyRS	1.09591	6.12207	1.29665e-05	0.000167592
dally	0.819656	6.58701	1.29867e-05	0.000167592
CG10939	-0.751827	8.53504	1.29882e-05	0.000167592
Pdfr	-1.02748	5.37561	1.30007e-05	0.000167592
Cyp311a1	0.932649	5.89341	1.30714e-05	0.000168164
twe	5.83863	4.09743	1.30806e-05	0.000168164
olf186-F	-0.803578	6.94959	1.3241e-05	0.000169885
CG16978	0.763824	8.02954	1.32504e-05	0.000169885
Dsk	1.48239	2.03559	1.36147e-05	0.00017432
CG4576	-0.789485	8.26833	1.36895e-05	0.00017504
Zip89B	1.60888	3.5818	1.40104e-05	0.000178902
CR44169	-1.66991	1.3338	1.41692e-05	0.000180686
foi	0.715352	8.2821	1.4563e-05	0.000185458
Galk	0.826927	6.94111	1.53696e-05	0.000195427
Dnai2	1.00574	5.49432	1.53871e-05	0.000195427
Obp99d	-1.95529	0.646797	1.58243e-05	0.00020071
rn	1.60933	1.3492	1.59494e-05	0.000201979
Col4a1	0.936433	6.15043	1.5967e-05	0.000201979
CG6225	0.815347	6.7401	1.62431e-05	0.000205197
CG42826	1.60998	1.20243	1.6317e-05	0.000205855
dsb	1.13923	4.97826	1.72613e-05	0.000217427
CG14085	1.0819	5.13521	1.72801e-05	0.000217427
CG30101	1.65538	1.78535	1.83641e-05	0.000230758
CG9631	1.04343	5.5121	1.85049e-05	0.000232215
hig	0.86248	6.07721	1.85291e-05	0.000232215
CR14033	2.35212	4.1802	1.8558e-05	0.00023227
CG14367	-0.722157	7.77196	1.91717e-05	0.000239633
mad2	3.60225	3.45072	1.98306e-05	0.000247543
CG4525	-0.903637	5.8807	1.98733e-05	0.000247749
Eip63F-1	0.865219	6.54373	2.08419e-05	0.000259481
CG14853	-0.767375	6.89864	2.13044e-05	0.000264892
AttB	1.44312	4.89106	2.16471e-05	0.000268798
Amt	0.754059	9.9736	2.17265e-05	0.000269432
GstE6	-0.729942	8.73377	2.20762e-05	0.000273409
CG17124	-0.798579	6.6426	2.24398e-05	0.000277549
CG9593	1.59257	1.84941	2.34822e-05	0.000290064
Gadd45	1.20524	4.70892	2.38436e-05	0.000294143
ninaD	2.02865	0.290142	2.3882e-05	0.000294234
CG7530	1.14788	5.26101	2.42192e-05	0.000298
Tb	2.0055	0.640349	2.49583e-05	0.000306696
CG31313	0.806945	8.17276	2.50603e-05	0.000307549
CG12483	-2.23716	5.77456	2.54088e-05	0.000311423
CG14982	-1.14133	4.86453	2.55107e-05	0.000312266
alpha-Est2	-1.50504	1.91835	2.56711e-05	0.000313553
Sytalpha	0.840707	6.57042	2.5682e-05	0.000313553
CG10737	-0.777105	9.28256	2.59188e-05	0.000316036
Rbp6	-0.717496	9.52547	2.62273e-05	0.000319385
vkg	0.931324	5.74222	2.68251e-05	0.000326246
CG42399	-0.90125	5.8409	2.69801e-05	0.00032771
CR44283	1.6926	3.98217	2.71701e-05	0.000329594
Dro	1.50895	5.01772	2.72407e-05	0.000330027
CG13842	1.0214	5.22226	2.81551e-05	0.000340669
CG15247	1.8838	2.61898	2.85465e-05	0.000344965
dati	-1.16605	4.90755	2.87931e-05	0.000347214
nrv2	0.731165	9.33736	2.88061e-05	0.000347214
Eglp4	-0.743545	7.71095	2.89459e-05	0.000348456
Gclc	-0.69321	7.95953	2.92747e-05	0.000351966
Nrx-1	-0.71031	8.62683	2.94099e-05	0.000352729
SoYb	2.11435	3.57515	2.94324e-05	0.000352729
Pgd	-0.701626	7.78676	2.945e-05	0.000352729
CG30427	0.833825	6.29077	2.97926e-05	0.000356381
dpp	1.09003	5.25278	3.04299e-05	0.000363545
Mcm5	3.26978	2.82623	3.05236e-05	0.000363892
CR46041	-1.30437	4.59323	3.05359e-05	0.000363892
NimB2	1.40042	4.22801	3.06682e-05	0.00036501
GV1	-0.792675	6.78887	3.13807e-05	0.000372711
CG14024	-1.47007	2.76144	3.13941e-05	0.000372711
l(2)k05911	1.74308	0.675151	3.1611e-05	0.000374366
CG15765	0.726302	7.06934	3.16126e-05	0.000374366
CG3036	0.904932	6.07904	3.2203e-05	0.000380728
NPFR	-1.68099	1.23229	3.22303e-05	0.000380728
wun	-0.752349	6.84664	3.24029e-05	0.00038229
sxe2	0.909139	9.22976	3.27181e-05	0.000385527
scra	3.20231	3.92489	3.30568e-05	0.000389034
CG32225	-0.875927	5.88698	3.31755e-05	0.000389946
CG3769	-1.25255	4.60942	3.32568e-05	0.000390417
CG7910	1.52076	2.37125	3.34506e-05	0.000392205
Root	-1.27666	4.1803	3.36089e-05	0.000393424
mtsh	1.80063	0.62007	3.36377e-05	0.000393424
chn	-0.708748	7.8251	3.37728e-05	0.000394516
nolo	0.961593	5.48988	3.39365e-05	0.00039594
Zw	-0.711947	7.50707	3.47826e-05	0.000405311
sprt	0.788222	6.45598	3.50419e-05	0.000407831
CG6845	1.39769	2.71187	3.54017e-05	0.000411512
BubR1	3.2826	3.54798	3.54706e-05	0.000411807
Jheh1	-0.766214	9.07701	3.64076e-05	0.000422167
CG8173	4.25443	3.81987	3.66662e-05	0.000424646
Gbs-70E	1.56485	6.03251	3.6768e-05	0.000425305
CG31705	0.690514	8.12795	3.78182e-05	0.000436918
CG10738	1.21225	4.60349	3.82625e-05	0.000441512
jeb	-1.01623	5.30335	3.83177e-05	0.00044161
CG1146	1.14342	5.36055	3.85243e-05	0.000443451
Hk	-0.748452	8.0057	3.8848e-05	0.000446635
tfc	2.95252	1.06957	3.9312e-05	0.00045142
CG6426	1.11412	4.98727	3.94272e-05	0.000452194
CG5955	1.16646	4.74746	3.96449e-05	0.000454141
CG34002	1.93617	0.323795	3.99193e-05	0.000456731
Sulf1	0.709117	7.0658	4.00293e-05	0.000457437
CG42346	1.47634	1.38422	4.13088e-05	0.000471488
CG13793	1.34216	3.06724	4.18429e-05	0.000477009
Skeletor	1.4321	3.43583	4.19072e-05	0.000477167
Pu	0.784243	7.47718	4.27529e-05	0.000486211
CG8547	0.714454	8.06116	4.35219e-05	0.000494362
CG42402	1.20405	4.61626	4.3971e-05	0.000498866
Spn42Db	-1.49654	1.43644	4.49503e-05	0.000509365
CR32205	2.32585	2.0675	4.50942e-05	0.000510385
alpha-Est4aPsi	1.62312	1.8619	4.54881e-05	0.000514227
Snp	1.00339	6.11646	4.56034e-05	0.000514915
CR43651	3.00285	1.79706	4.57494e-05	0.000515948
wrapper	1.52174	1.19947	4.58847e-05	0.000516858
CG13855	0.948542	5.44703	4.67454e-05	0.000525927
CG5048	1.04082	5.09529	4.70744e-05	0.000528447
Rim	-0.856486	6.6486	4.7081e-05	0.000528447
Est-6	0.715469	11.2963	4.71391e-05	0.000528472
CG9170	-0.712492	7.33251	4.76397e-05	0.000533452
CanB	-0.876267	5.7762	4.84198e-05	0.000541547
Ppn	0.8424	6.53321	4.86239e-05	0.000543187
CAHbeta	-1.2024	4.5344	4.95738e-05	0.000553145
Glycogenin	1.07102	6.73225	4.99155e-05	0.000556302
CG9492	0.765595	8.36252	5.07987e-05	0.000565479
caup	2.34946	1.96881	5.11617e-05	0.00056885
alphaTub85E	1.61768	3.24492	5.15403e-05	0.000572388
CycA	4.69425	4.87089	5.26381e-05	0.000583894
CG10747	0.812738	6.10262	5.30386e-05	0.000587648
CG31445	1.24392	4.51793	5.33474e-05	0.000590378
CR44833	-1.58541	0.964849	5.43605e-05	0.000600887
CG30016	1.51494	1.38591	5.51156e-05	0.000608523
tsl	1.22801	4.39349	5.52683e-05	0.000608967
Mcm7	4.14058	3.08822	5.52846e-05	0.000608967
VhaAC45	-0.666697	9.00058	5.61602e-05	0.000617893
CR32207	2.24862	1.75387	5.73828e-05	0.000630611
CR44298	-1.63729	0.849123	5.76525e-05	0.000632839
CG43902	-0.681576	7.5148	5.77711e-05	0.000633407
spd-2	2.58807	1.48824	5.94133e-05	0.000650658
rdhB	1.42577	1.70951	5.96806e-05	0.00065283
CG15186	-1.25394	4.22039	5.99612e-05	0.000655141
CG3339	0.759196	7.18155	6.09843e-05	0.000665552
CG3308	0.744941	7.65716	6.10885e-05	0.00066563
ZnT35C	1.0306	5.38635	6.11321e-05	0.00066563
Sobp	-1.2965	3.88212	6.1309e-05	0.000666788
CG1607	1.22736	4.66819	6.15684e-05	0.000668392
CG1998	-0.719512	6.885	6.16201e-05	0.000668392
teq	1.08744	5.13698	6.16684e-05	0.000668392
CG43091	0.755366	7.04589	6.21566e-05	0.000672913
Oseg1	-0.841375	5.95882	6.22499e-05	0.000673152
CG9451	0.716076	7.25005	6.24159e-05	0.000674177
Dl	1.41684	4.32904	6.34919e-05	0.00068457
CG32695	-1.78877	0.734772	6.35227e-05	0.00068457
mir-7	-1.63153	1.30575	6.39073e-05	0.00068793
CG6216	1.30426	3.81441	6.4222e-05	0.000690532
CG13077	-1.66733	4.222	6.52841e-05	0.000701156
eIF4E-6	1.61574	1.54679	6.54877e-05	0.000702545
CG3397	1.60691	1.48139	6.67647e-05	0.000715433
CG31323	-0.946034	5.38071	6.68772e-05	0.000715828
Con	-1.01639	5.18319	6.76233e-05	0.000722997
CG9674	0.681164	9.27577	6.78561e-05	0.000724666
CG3902	0.916061	6.82404	6.81656e-05	0.000727151
CG11041	0.906317	5.60336	6.84269e-05	0.000729116
nan	1.12092	4.67053	6.9062e-05	0.000735056
CG14342	1.11364	4.72235	7.00032e-05	0.000744237
LManII	0.783057	6.57357	7.06193e-05	0.000749944
Ance	0.734625	6.72801	7.13939e-05	0.000757219
Cpr49Ae	0.875262	5.78108	7.14645e-05	0.000757219
CG17364	-0.794615	6.38865	7.17264e-05	0.000759145
CG32206	-1.12077	4.70741	7.45339e-05	0.000787977
CG42711	1.49302	1.66371	7.5186e-05	0.000793984
qsm	0.8359	6.04534	7.54003e-05	0.00079536
Cyp6a20	-0.757091	7.19955	7.56384e-05	0.000796983
b	1.03343	5.16758	7.59513e-05	0.00079939
CG9733	1.42757	2.99777	7.73072e-05	0.000812757
CG34454	1.32373	4.1577	7.8874e-05	0.000828309
CG31140	-0.818349	6.26438	7.99041e-05	0.000838196
Kaz1-ORFB	1.30085	2.57235	8.04883e-05	0.000843389
GstE3	-0.689897	7.94531	8.13837e-05	0.000851828
ClC-a	0.745043	6.84346	8.43271e-05	0.00088166
tej	3.59315	2.88564	8.52697e-05	0.000890532
laza	1.69978	0.348617	8.55269e-05	0.000892234
CG15099	-0.690207	6.92541	8.58241e-05	0.000894347
CG13743	1.18152	4.29185	8.6839e-05	0.000903928
obst-B	1.6706	0.722785	8.74975e-05	0.000909782
CG44085	1.18666	6.85947	8.78285e-05	0.000912221
SPoCk	-0.644255	9.25224	8.87645e-05	0.000920931
CG1572	0.910819	5.55867	8.93737e-05	0.000926236
Sr-CI	1.40133	3.33417	8.96601e-05	0.000928183
CG15771	-0.676195	7.31912	8.97577e-05	0.000928183
CR44912	1.49257	1.44382	9.03871e-05	0.000933672
CG15878	1.20099	4.21992	9.1658e-05	0.000945767
CG34109	1.53041	1.25672	9.20446e-05	0.000948721
CG14321	-1.30299	3.72172	9.28103e-05	0.000955572
CG30441	-1.45396	2.82509	9.33769e-05	0.000960362
RluA-1	0.971274	5.29384	9.35669e-05	0.00096127
Amy-d	-2.92651	2.15443	9.41717e-05	0.000965579
CG18635	1.31623	2.03387	9.41904e-05	0.000965579
Cbp53E	-0.676595	6.93067	9.61546e-05	0.000984309
CG10352	1.60547	0.540931	9.62256e-05	0.000984309
Dhap-at	-0.889911	5.59133	9.64779e-05	0.000985825
CG31875	2.06258	1.82389	9.67244e-05	0.000986591
CG14291	1.32047	2.8354	9.67614e-05	0.000986591
CG15701	-0.999019	5.15007	9.85269e-05	0.00100351
Irk2	0.731205	6.8423	9.95945e-05	0.00101329
yellow-c	1.08713	4.8759	9.99108e-05	0.00101466
CG4752	1.50576	3.45154	9.9943e-05	0.00101466
CG3345	-1.60053	1.17853	0.00010045	0.00101871
CG5639	-1.47281	3.81734	0.000100779	0.00102095
CG7365	1.32839	4.10938	0.000102921	0.00104154
CG10550	-0.66721	9.72636	0.000104823	0.00105965
apt	1.61689	5.40437	0.000106933	0.00107983
run	0.9599	5.28437	0.000107184	0.00108121
CG8550	1.07144	4.82823	0.000107662	0.00108365
nec	0.713037	7.14346	0.000107716	0.00108365
GluRIIC	1.52325	1.52631	0.00010777	0.00108365
Cdk1	3.85701	4.12154	0.000108297	0.0010878
CG7695	1.64916	7.94619	0.000108798	0.00109167
CG6927	1.738	0.512089	0.000109526	0.00109781
CR44137	-1.25053	4.03958	0.000110325	0.00110465
CG10064	1.31627	2.23546	0.000111116	0.00111139
CG44153	1.58967	0.509159	0.000112738	0.00112643
CG31207	0.75004	7.21273	0.000113617	0.00113401
Odc1	-1.34414	2.05018	0.000113921	0.00113585
Actbeta	-0.812692	5.90859	0.000114171	0.00113714
CG43897	1.02482	9.77878	0.000114296	0.00113719
CG6980	1.27282	2.44643	0.000114451	0.00113753
CG9312	1.2661	3.78447	0.000115143	0.00114321
tor	2.43087	2.77559	0.000116271	0.0011532
Act57B	1.25251	6.97468	0.000116997	0.00115919
CG17387	1.35215	1.76065	0.000117745	0.00116538
Pask	-1.0581	4.79537	0.000118906	0.00117564
mGluR	1.38657	2.14173	0.000120016	0.00118537
CG13599	2.94522	2.05963	0.000120941	0.00119327
CG5549	-0.963774	5.19326	0.000121699	0.0011995
CG14693	1.16509	4.22513	0.000122187	0.00120305
CG11356	-1.2735	2.66511	0.000122642	0.00120628
PCNA	3.76295	3.15524	0.000124229	0.00122061
CG3679	3.68364	3.55933	0.000125612	0.00123292
CG34347	-1.13913	4.35695	0.000126454	0.00123991
rdgC	-0.842137	5.77346	0.00012752	0.00124907
Cyp6a21	0.754034	7.06443	0.00012778	0.00125031
CG17843	1.24419	3.92689	0.000131689	0.00128723
CG12836	0.909604	5.32131	0.000132137	0.00129028
Tm1	0.907633	8.51084	0.000132866	0.00129606
Rab26	-0.986614	5.01817	0.000133271	0.00129773
dah	5.04691	4.39937	0.000133312	0.00129773
CR33294	1.29437	2.28167	0.000134208	0.00130512
CG15365	1.08066	4.72485	0.000136023	0.00132005
goe	0.95288	5.36491	0.000136023	0.00132005
fusl	1.19915	3.9725	0.000140566	0.00136188
CG6688	1.76205	-0.249452	0.000140621	0.00136188
CR44320	-1.39401	1.67521	0.000142202	0.00137579
CG42633	1.02168	4.81635	0.00014255	0.00137759
CR31451	-0.729553	6.78337	0.00014268	0.00137759
CG31125	-1.12665	4.30881	0.000144817	0.0013968
CG15083	0.917044	5.34949	0.000147438	0.00142063
snz	-0.747768	6.3749	0.000148634	0.0014307
dila	-1.12449	4.40674	0.000151683	0.00145857
pyx	1.23062	3.72617	0.000152178	0.00146183
CR45054	1.4607	1.79425	0.000153024	0.00146847
CG4733	0.660227	7.03842	0.000153441	0.00146895
sti	4.75455	3.90386	0.000153504	0.00146895
dtr	1.1406	4.21301	0.000153539	0.00146895
Mlp84B	1.10067	8.66935	0.000154845	0.00147923
Buffy	0.857006	5.62024	0.000154926	0.00147923
Plp	0.75021	6.70157	0.000156487	0.00149262
feo	3.53232	2.9166	0.000157611	0.00150183
CG34208	2.38174	4.65688	0.000157985	0.00150387
fw	-1.08333	4.66194	0.000158675	0.00150893
CG1275	0.765292	6.40963	0.000161942	0.00153767
unc79	1.05227	4.81069	0.000162022	0.00153767
salm	0.944501	5.10438	0.000164963	0.00156287
Or33c	-1.60602	1.85577	0.000165008	0.00156287
Klp64D	-0.661941	6.9631	0.00016592	0.00156973
CG31075	0.744687	8.55451	0.000166064	0.00156973
Clect27	0.930498	5.53205	0.000166948	0.00157518
sstn	1.49142	4.73676	0.000166974	0.00157518
ham	1.25249	3.14118	0.00017012	0.00160326
CG30340	-1.7844	0.275564	0.000170496	0.0016043
CR45985	-1.58611	0.63821	0.000170569	0.0016043
Lkr	1.45718	1.09278	0.000171283	0.00160941
CG1213	1.26591	3.73448	0.0001726	0.00162018
mus301	1.43554	1.04025	0.000173664	0.00162855
CG7384	3.20485	3.3601	0.000173974	0.00162985
Pde8	-0.708518	6.84529	0.000174198	0.00163033
Eglp2	-1.2872	3.6594	0.000175739	0.00164312
Hasp	1.46246	1.37438	0.000176511	0.00164871
zormin	0.798459	8.06384	0.000177312	0.00165456
CG4238	-0.654467	7.0321	0.00018052	0.00168284
Rbfox1	0.760912	6.1549	0.00018109	0.00168649
ncd	3.72087	4.04545	0.000181549	0.0016891
CCDC151	1.13921	4.19079	0.000181785	0.00168964
CG4998	1.64121	0.647866	0.00018287	0.00169645
sad	-1.45892	0.863571	0.000182876	0.00169645
CG3588	1.38109	1.19706	0.000183207	0.00169785
Caf1-180	3.0789	4.77621	0.000184086	0.00170433
CG6231	-0.795709	5.95085	0.000184822	0.00170946
Gasp	0.896051	5.35387	0.000188159	0.00173864
iotaTry	1.22917	2.28708	0.000190967	0.00176286
CG8888	1.50524	3.30966	0.000192509	0.00177536
CG13921	2.19271	2.30281	0.000193221	0.00178019
CR45615	1.25328	2.51966	0.000193654	0.00178245
CG8245	-0.672739	6.89946	0.000197859	0.00181938
psh	1.11401	4.55842	0.000199357	0.00183138
CG9396	0.92436	5.25484	0.000200511	0.00184019
Listericin	1.1633	5.36963	0.000204077	0.0018711
Swim	0.762007	6.00306	0.000205474	0.00188088
CG34375	1.28459	2.10796	0.000205541	0.00188088
Kal1	1.20998	2.63334	0.000205764	0.0018811
cona	1.90228	0.362516	0.000209017	0.001909
grk	1.37338	3.34638	0.000209649	0.00191293
Rgk2	-1.42278	0.844177	0.00021544	0.00196386
CG4766	1.22962	3.48979	0.000215728	0.0019646
Erk7	1.24726	2.8911	0.000216587	0.00197052
CG18336	0.896725	5.28393	0.000216836	0.0019709
TM4SF	-0.638652	7.3157	0.000217223	0.00197251
CG11378	1.29566	3.41359	0.0002184	0.0019813
Strica	2.13309	0.79086	0.000219634	0.00199059
Oseg4	-0.885629	5.223	0.000221253	0.00200335
Poc1	2.77443	3.52731	0.000222243	0.00201038
GstD2	-0.666298	6.94839	0.00022393	0.00202371
CG33475	-1.73382	0.0575741	0.000228015	0.00205748
tx	0.964983	4.93012	0.000228102	0.00205748
Klp67A	3.17499	2.54242	0.000228463	0.00205878
wtrw	0.61967	7.39234	0.000229852	0.00206933
GABA-B-R2	-0.706269	6.31665	0.00023151	0.00208227
VhaAC39-1	-0.612186	8.4258	0.0002325	0.00208918
CG34446	1.35723	1.39628	0.00023298	0.00209151
kek1	-0.947634	4.9363	0.000234203	0.0021005
Glut1	-0.671935	8.03853	0.000234794	0.00210381
CG1941	0.855933	5.82299	0.000239182	0.0021411
CR46061	-1.59832	0.435863	0.000240212	0.00214828
CG14079	-1.08824	4.4763	0.000241046	0.00215371
CG8492	1.23287	2.32891	0.000242796	0.0021673
Ugt58Fa	1.58578	0.790423	0.00024658	0.002199
CG4860	1.42352	2.20094	0.00024832	0.00221243
Ser7	0.825613	5.89375	0.000248845	0.00221499
Tpi	-0.642446	8.02957	0.000249075	0.00221499
CG4962	1.6441	3.30796	0.000249731	0.00221674
CG7881	1.4524	0.793338	0.000249741	0.00221674
CG6293	0.864483	5.28593	0.000250276	0.00221941
Hsp67Bc	1.57127	0.24413	0.00025366	0.0022467
Akap200	2.27101	6.36541	0.000253828	0.0022467
CG45076	1.08257	6.51406	0.000255966	0.0022635
Cdk5alpha	-0.639116	7.09358	0.000258248	0.00228155
Amy-p	-2.90925	2.41388	0.000259675	0.00229014
Cyp9h1	1.26026	2.97835	0.000259704	0.00229014
CG9368	-1.19283	3.79018	0.000260398	0.00229412
CG8629	-1.37476	1.2055	0.000260739	0.00229499
Cirl	0.630891	8.41987	0.000262587	0.0023071
Vha100-2	-0.600476	9.12799	0.000262602	0.0023071
CG13707	1.18477	3.79025	0.000263597	0.00231369
CG9395	-0.801179	5.68566	0.000264431	0.00231886
CG3376	0.679214	6.67688	0.000265264	0.00232401
ed	1.076	6.0629	0.000266515	0.00233281
CG10131	1.35456	1.91337	0.000270838	0.00236715
CG33080	0.703139	6.40704	0.000270939	0.00236715
Hsc70-3	-0.599635	9.13817	0.000273629	0.00238844
CG5890	-1.1686	4.12353	0.000276622	0.00241235
nAChRbeta2	1.24264	2.3765	0.000277673	0.0024178
tty	-0.936322	5.55279	0.000277758	0.0024178
CG14854	1.35866	2.93289	0.000280588	0.00244018
fs(1)Ya	1.82928	0.456729	0.000283314	0.00246163
Ir31a	0.790816	6.04782	0.000284166	0.00246677
CG14052	1.41312	0.979908	0.000285507	0.00247614
dpr13	1.02896	4.78624	0.000287084	0.00248753
Npc2b	0.677698	8.25121	0.000288037	0.00249351
CG13650	-0.697428	6.56838	0.00028998	0.00250804
Dad	0.683943	6.70739	0.000293201	0.00253358
dpr5	0.921322	5.06578	0.000294069	0.00253754
CG1265	0.911086	5.42341	0.000294196	0.00253754
CG4267	0.830977	5.76321	0.000295542	0.00254683
CG3328	0.595071	7.91825	0.000298421	0.0025693
lbm	-0.705564	6.44318	0.000299601	0.00257711
Obp57c	0.702025	9.50352	0.000300236	0.00258023
Ef1alpha48D	0.824068	11.4712	0.000301774	0.0025911
tyn	-1.2633	3.18225	0.000302323	0.00259345
VhaPPA1-1	-0.593452	8.67672	0.000307055	0.00263166
CG42366	-0.809489	5.64917	0.000308769	0.00264215
Fife	0.856597	5.34343	0.000308837	0.00264215
CG8785	0.631538	7.12536	0.000309762	0.00264767
AstC-R2	-1.39603	1.23385	0.00031046	0.00265124
DopEcR	-0.64403	8.25942	0.000311979	0.00266181
Ant2	-1.26652	2.07409	0.00031348	0.00267221
CG4462	0.963273	4.88124	0.000315926	0.00269063
Df31	1.69867	8.4883	0.000319046	0.00271476
Dtg	1.43177	0.750987	0.000320425	0.00272183
Timp	0.899681	5.41575	0.000320452	0.00272183
Grip	1.06777	4.3261	0.000329808	0.00279879
ex	0.824938	5.56312	0.000333687	0.00282916
Ir94b	1.24824	3.02371	0.000335916	0.00284551
dpr7	-0.733668	6.49367	0.000338376	0.00286379
SK	-0.649787	7.56437	0.000339313	0.00286915
CG6125	0.862317	5.40435	0.00034062	0.00287763
Eip71CD	-0.765335	6.38113	0.000342512	0.00289104
CG5687	0.602518	9.84772	0.00034307	0.00289316
Skp2	2.25938	4.10799	0.0003447	0.00290432
yellow-f2	0.783559	5.95486	0.000346197	0.00291199
CG13008	1.37856	1.25052	0.000346226	0.00291199
CG7255	1.24655	2.89704	0.000348997	0.00293097
mars	2.35706	4.49531	0.000349102	0.00293097
hng3	1.59507	3.44736	0.000353517	0.00296541
Coop	1.17385	3.64993	0.000354438	0.00296951
Vha36-1	-0.60358	8.38918	0.000354639	0.00296951
CG30377	1.82975	2.37965	0.000354948	0.00296951
Nurf-38	-0.608996	8.32045	0.000356229	0.0029776
CG43795	1.1807	3.62566	0.000357238	0.00298339
CG18662	-1.64475	0.0652357	0.000357992	0.00298706
CG42246	0.913242	5.19991	0.000359437	0.00299647
Lim1	1.04546	4.55764	0.000364711	0.00303619
kuk	1.44022	7.19757	0.000364844	0.00303619
drpr	-0.623188	7.01093	0.000366025	0.00304093
pim	3.00592	4.25703	0.000366056	0.00304093
Wnt10	1.38044	0.991638	0.000367232	0.00304803
Cep89	1.42834	0.849468	0.000368836	0.00305865
Sdc	0.595368	7.69632	0.000370873	0.00307286
lectin-24Db	1.1233	4.05241	0.000372605	0.00308451
CG7409	0.667919	9.86588	0.000376615	0.00311353
CG31706	1.14506	4.26373	0.00037677	0.00311353
CG14185	1.01653	4.55573	0.000378579	0.00312399
lili	0.835867	5.36797	0.000378696	0.00312399
Tctp	0.792943	9.80625	0.000381323	0.00313951
Syt7	-0.669257	6.85657	0.000381376	0.00313951
CG14274	0.644012	7.14827	0.000381572	0.00313951
CG7565	-0.821768	5.48991	0.000382976	0.00314804
Tsp42Ed	-0.626179	7.51358	0.000383275	0.00314804
Ugt35a	0.713923	7.56843	0.000383828	0.00314985
CG9194	1.65642	-0.117566	0.000387039	0.00317345
CG6959	0.853181	5.54153	0.000388532	0.00318294
Cpr66D	1.27014	1.71286	0.000390939	0.00319988
dup	3.41046	5.0661	0.000391631	0.00320278
CG12224	1.16589	2.75626	0.000392328	0.0032057
Tsp5D	1.17148	3.53699	0.000395154	0.00322601
Npc2a	0.745113	6.1174	0.000395703	0.00322771
asf1	-0.890575	5.09353	0.000396481	0.00323127
Mp20	1.41047	6.89875	0.000398322	0.00324348
CG2003	1.06853	4.43756	0.000399296	0.00324716
CG6967	1.42544	0.976641	0.00039946	0.00324716
Btk29A	1.46898	5.76137	0.000410784	0.00333634
CG32040	-1.07367	4.62013	0.000414507	0.00336134
CG7149	-0.722271	6.4552	0.000414572	0.00336134
CG11686	1.07674	4.33486	0.000415081	0.00336258
bond	-0.71444	6.47353	0.000415735	0.003365
CG30485	-1.17163	2.23432	0.000416891	0.00337147
CG4586	3.85603	3.11402	0.000425185	0.00343561
CG10359	1.17853	3.01545	0.000428007	0.00345546
GstD10	-1.18467	2.50049	0.000430317	0.00347115
CR46239	1.42722	0.682182	0.00043151	0.00347781
hth	0.620575	8.86468	0.000434919	0.0035023
CG14615	1.10801	4.18496	0.000438502	0.00352815
CG14880	1.02472	4.48725	0.000442343	0.00355604
Frq2	0.997846	4.86752	0.000443834	0.00356499
bnl	0.995771	4.71107	0.000444534	0.00356758
prel	-0.606826	7.37324	0.000454447	0.00364405
CG6126	0.701311	6.14317	0.000457101	0.00366222
kek3	-0.823843	5.58735	0.000457771	0.00366449
Hsp68	1.24013	4.12039	0.000460355	0.00368206
hmw	-1.14202	3.65652	0.000461053	0.00368453
slow	0.914174	4.9067	0.00046264	0.00369365
verm	1.12865	4.1225	0.000462975	0.00369365
CG15546	1.27791	3.78139	0.000466109	0.00371245
Gas8	1.07723	4.17235	0.000466116	0.00371245
CG2269	-0.606328	7.26483	0.000472424	0.00375953
CG14020	-0.907129	4.98252	0.000472948	0.00376053
CG14221	0.914258	4.95011	0.000474423	0.00376772
LManI	1.20252	2.30679	0.00047504	0.00376772
CG3277	-1.32177	1.36891	0.000475047	0.00376772
CG32017	-0.80166	6.00316	0.000478816	0.00379444
SIFaR	-1.16593	2.88219	0.000479409	0.00379595
VhaSFD	-0.575552	8.92936	0.000480535	0.00380169
CG45781	-1.20927	2.87253	0.00048705	0.00385001
CG15021	0.712027	6.64034	0.000489348	0.00386495
VhaM8.9	-0.580645	8.71536	0.00049087	0.00386786
Ror	-1.11193	3.98593	0.000490885	0.00386786
CG4259	1.40332	0.693156	0.000490943	0.00386786
thw	1.54408	-0.0469445	0.000494074	0.00388719
dlp	1.42359	4.77696	0.000494218	0.00388719
CG32572	1.39468	0.734948	0.000500182	0.00393083
Tsp29Fb	-0.609656	9.20954	0.000501582	0.00393856
sage	-1.20489	2.4693	0.000506115	0.00397086
NimC2	1.32664	0.886292	0.000511986	0.0040136
CG6910	0.732084	7.23152	0.000515947	0.0040413
bun	-0.569945	8.85851	0.00051693	0.00404565
Pglym78	-0.57957	8.31266	0.000521182	0.00407556
Hydr1	-0.590767	8.35165	0.000522811	0.00408492
CG31345	-1.06319	4.17282	0.000530059	0.00413481
CG32694	0.593796	8.55256	0.000530071	0.00413481
Orc1	2.91595	3.00695	0.000530859	0.00413755
CG9272	1.34595	3.70171	0.00053538	0.00416936
alphaTub84B	0.66888	10.586	0.000536729	0.00417642
CG43120	1.38797	0.671206	0.000543761	0.00422766
Apc2	2.28983	4.14997	0.000547489	0.00425315
CG12484	0.60425	7.00982	0.000548602	0.0042583
CG33543	1.01424	4.36487	0.000552075	0.00428175
CG15695	1.17007	3.40109	0.000553839	0.00429191
CG11362	-1.35761	0.906646	0.000554663	0.00429478
dysf	1.19918	3.01007	0.000556925	0.00430877
metro	-0.723253	5.8629	0.000565814	0.00437396
CG9650	1.13203	3.80805	0.000571094	0.00441118
CG14945	1.14561	3.91216	0.00057427	0.00443209
rho	0.809659	5.42951	0.000576973	0.00444933
CG1545	1.22023	1.82365	0.000578809	0.00445734
CR43452	1.61364	0.849078	0.000578955	0.00445734
Tg	0.905092	5.08953	0.000589331	0.00453353
CG4783	-1.40106	1.07622	0.000591581	0.00454541
mnd	1.74665	2.37032	0.000591835	0.00454541
CG13631	0.652471	6.51984	0.000595264	0.00456096
CG17928	0.601695	7.47352	0.000595563	0.00456096
fd3F	1.13997	3.09202	0.00059565	0.00456096
UK114	1.61526	1.87624	0.000595788	0.00456096
Orct2	-1.04431	4.29072	0.000598107	0.00457501
CG8407	1.10866	3.65196	0.000607468	0.00464286
CG7296	1.34661	3.22027	0.000609262	0.00465086
Ir25a	-0.574346	7.93057	0.000609498	0.00465086
CG10863	0.569489	7.48872	0.000612287	0.00466838
CG17190	1.22923	2.56737	0.000613435	0.00467337
CG43920	0.960993	4.79041	0.000617622	0.00470148
CR46015	-1.47916	0.247651	0.000625101	0.00475459
CR44779	1.25058	2.06254	0.00062873	0.00477835
CG15120	1.01894	4.31184	0.00062954	0.00478066
CG2444	1.36864	1.14321	0.000634206	0.00481224
CG3788	2.13939	1.06644	0.000640349	0.00485495
slp1	-0.805063	5.42092	0.000643371	0.00487396
EF2	0.639998	11.2667	0.000646082	0.00489058
dar1	1.11197	3.38789	0.000648239	0.00490299
CG6044	0.640228	6.56271	0.000649628	0.00490957
Zwilch	1.43156	0.81259	0.00065392	0.00493806
Sesn	0.775378	6.20644	0.000659262	0.00497316
Pal2	-0.600185	6.94995	0.00065962	0.00497316
hdly	0.864592	5.29732	0.000660889	0.00497877
CG9497	-0.599762	12.2053	0.0006636	0.00499522
Galphai	1.03239	6.66533	0.000666535	0.00501332
CG31019	0.796548	5.45959	0.000670142	0.00503645
coro	0.947654	6.57581	0.000672345	0.00504899
sog	0.743852	5.82648	0.000675444	0.00506824
CG9114	1.39556	3.55577	0.000680246	0.00510023
Cyp318a1	1.10951	3.19023	0.000684933	0.00513086
RhoGAP100F	-0.726048	6.39843	0.000685416	0.00513086
CG8745	1.2495	3.81474	0.000688936	0.00515102
hebe	0.60581	7.59265	0.000689199	0.00515102
Cyp6g2	-0.652955	8.7228	0.000691625	0.0051643
Acox57D-d	-1.12955	3.12605	0.000692067	0.0051643
scrt	-0.698997	6.2331	0.000693726	0.00517103
CG34180	1.0016	5.0688	0.000694353	0.00517103
CG32816	1.3589	3.4622	0.000695099	0.00517103
btsz	0.56353	7.52278	0.000695154	0.00517103
Tsf3	0.832212	5.2532	0.000697314	0.00518302
CG9815	1.13186	3.01923	0.000700467	0.00520237
mlt	0.558328	7.87259	0.000703111	0.00521791
Rif1	2.97561	4.82863	0.000710951	0.00527196
pncr009:3L	1.03646	4.23622	0.000712861	0.00528198
CG7708	-0.622581	7.11405	0.000714577	0.00529036
hb	1.66028	1.04044	0.000715303	0.00529036
mfrn	-0.587497	7.20518	0.000715669	0.00529036
CG17121	0.770669	5.60885	0.000716483	0.00529225
CG8258	-0.609404	6.84558	0.000721525	0.00532533
CG1909	-0.601755	7.07199	0.000728629	0.00537357
tun	1.0584	4.95474	0.000729501	0.00537581
CG3091	0.599269	7.11296	0.000738954	0.00544123
IFT57	-0.888837	4.90978	0.000740309	0.00544697
CG9338	0.579671	7.7132	0.000744359	0.00547251
pirk	1.23261	3.62229	0.0007476	0.00549207
B9d1	-1.12844	3.08586	0.000755573	0.00554634
CG12702	2.71303	2.92066	0.000758836	0.00556598
CG10361	1.11546	2.51391	0.000771751	0.00565325
CG30062	1.43486	0.310918	0.000772751	0.00565325
CG13954	-1.28526	1.27815	0.000772991	0.00565325
h	-0.606949	6.94677	0.000773124	0.00565325
CR44119	-1.12594	2.18489	0.000779118	0.00569268
CG12950	-0.869688	4.94283	0.000782957	0.00571631
CG2767	0.683886	6.10802	0.000789679	0.00576094
Spn27A	0.746542	6.14326	0.000795651	0.005797
Tl	1.48406	6.36309	0.000795846	0.005797
msd5	2.32539	1.7699	0.000799422	0.00581856
CG11044	1.51656	3.15974	0.000804823	0.00585337
Gp93	-0.589894	8.13448	0.000813461	0.00591165
CG9297	1.26269	8.55823	0.000816622	0.00593006
alpha-catenin-related	-0.621616	6.64828	0.000820937	0.00595683
IRSp53	0.694769	6.36793	0.000822188	0.00596133
Pex3	-0.680235	6.81594	0.000829402	0.00600903
CG4115	1.16173	4.0085	0.000830535	0.00601057
Pgk	-0.571963	8.51861	0.000830884	0.00601057
CR44127	1.15903	2.09319	0.000843089	0.00609318
Reep1	0.579938	7.37029	0.000843886	0.00609318
CG7737	2.48087	2.65059	0.000844236	0.00609318
Cyp6d5	0.678534	8.01997	0.000848105	0.00611644
Elba2	2.59267	3.10156	0.000850237	0.00612668
Rab6	-0.627252	6.5702	0.00085082	0.00612668
Invadolysin	-0.607131	6.74415	0.000856925	0.0061645
eater	1.37866	1.06534	0.000857375	0.0061645
hiw	-0.644161	6.41204	0.00086063	0.0061832
CG8854	1.13371	2.07814	0.000865218	0.00621145
CR43730	1.20373	1.42732	0.000877943	0.00629802
CG2698	0.576814	6.94742	0.000882521	0.00632607
dnd	-0.672676	6.3187	0.000883655	0.0063294
CG4210	-1.10904	2.46153	0.000886498	0.00634382
CG15909	-1.46796	0.128502	0.000887008	0.00634382
Tsp42Ei	0.675388	6.54808	0.000888301	0.00634827
elav	-0.651608	6.67856	0.000891696	0.00636772
CG2121	1.15124	2.03467	0.000893983	0.00637923
Indy	-0.563374	8.19721	0.000895761	0.00638711
E(spl)m2-BFM	-1.10977	2.47497	0.000899988	0.00641241
l(2)gl	0.808624	6.87631	0.000900914	0.00641418
Karybeta3	0.566785	8.18301	0.000905201	0.00643986
CG16786	0.836724	5.27206	0.000913146	0.0064915
pch2	2.50812	3.26535	0.000925665	0.00657556
CR44442	1.12974	2.41461	0.000929984	0.00659937
CG30156	-1.13651	2.52399	0.000930413	0.00659937
Drs	1.49032	1.68986	0.000934554	0.00662378
bmm	0.671581	6.47789	0.000942622	0.00667597
CG4329	0.957231	4.48143	0.000953676	0.0067492
RyR	0.935261	6.31482	0.000954824	0.00675228
CG15394	1.06154	3.79972	0.000959816	0.00678251
FER	0.933549	5.1257	0.000961922	0.00679232
CG10508	-0.585466	7.40037	0.000963613	0.00679918
CG13455	1.09011	3.17919	0.000966888	0.00681721
CG2852	0.825316	7.22357	0.000977063	0.00688382
CG10362	-0.753224	5.56835	0.000978331	0.00688763
CG8398	1.0943	2.7769	0.000983654	0.00691995
CG8620	1.37208	0.536358	0.000985669	0.00692898
Mal-B2	1.08417	4.64573	0.000988784	0.00694571
Trpgamma	-1.35293	0.586632	0.000992594	0.0069673
cmb	0.765131	5.85951	0.00100031	0.00701629
CG17739	0.760445	5.58388	0.00100481	0.00704262
CR44514	1.2507	1.03952	0.00100595	0.00704385
CTPsyn	1.03771	6.38226	0.00100648	0.00704385
CG12207	0.570913	7.08715	0.00101573	0.00710336
SKIP	2.20883	4.36039	0.00102536	0.00716541
CG32091	0.613892	7.0311	0.00102619	0.00716591
CG5791	-0.666859	6.33791	0.00103094	0.00719378
wgn	0.765584	5.50201	0.00103247	0.00719914
lectin-28C	1.26503	3.29413	0.00104003	0.0072465
Ir41a	1.21586	3.03628	0.00106458	0.00741209
pyr	1.05049	3.8341	0.00107912	0.00750779
PIP5K59B	-0.676156	5.99906	0.00108113	0.00751628
Taldo	-0.550306	7.97476	0.00108846	0.00756166
Sik2	-0.724538	5.65162	0.00109409	0.00759521
Dic1	-0.573276	7.1858	0.00109504	0.00759623
CG31279	-1.24941	2.12183	0.00109831	0.00761334
CG30285	0.55773	7.96364	0.00110283	0.00763909
Mcm2	1.56011	2.55342	0.00110529	0.0076505
IM23	-1.51208	4.73786	0.00111138	0.00768703
CG12910	-1.08332	3.46081	0.00111955	0.00773792
grim	-1.26264	1.00012	0.00112087	0.00774136
Pdcd4	0.672892	7.73302	0.00112595	0.0077708
CG15657	-1.33389	0.499593	0.00112973	0.00779118
CG1139	1.10811	2.00771	0.0011357	0.00782439
msps	0.547564	8.61718	0.0011362	0.00782439
CG3726	0.833026	5.18491	0.00114158	0.00785572
CG43689	-0.968769	4.54345	0.00114526	0.00787534
Proc	1.06011	3.70452	0.00115498	0.00793639
Ptr	1.11431	2.02417	0.00115627	0.0079395
PGRP-LF	1.09954	4.19435	0.00116008	0.0079599
CG9518	1.08557	2.32801	0.00116256	0.00797109
CG34351	1.31699	1.52607	0.00116489	0.00798092
IM1	-1.30125	5.44933	0.00116568	0.00798092
AGO3	2.7218	4.25423	0.00117313	0.00802562
MtnA	-0.568301	9.29746	0.0011739	0.00802562
CG11164	2.63004	3.45726	0.00118217	0.00807628
mthl15	-1.09455	2.9046	0.00118386	0.00808202
CG45263	0.767116	5.33369	0.00118811	0.00810517
CG7536	0.773378	6.00376	0.00119713	0.00816084
nompB	-0.66221	6.13342	0.00120361	0.00819914
norpA	-0.586261	6.72548	0.0012064	0.00821219
CG14834	1.3865	0.997102	0.00121229	0.00824633
fng	0.766679	5.42825	0.00123356	0.00838503
Dgkepsilon	-0.651473	6.008	0.00123463	0.00838629
CG14715	-1.07227	3.23513	0.00124024	0.0084162
Galphao	-0.56634	7.4529	0.00124082	0.0084162
RhoGAP102A	-0.87689	4.97822	0.00124713	0.00845296
Frl	0.577608	6.80516	0.00125758	0.0085177
Cad74A	1.33991	1.01668	0.00126434	0.00855736
Kr-h2	-0.573088	7.39169	0.00126668	0.00856709
CG31475	-0.715368	5.61872	0.00127037	0.00858389
LanB1	0.771484	5.31735	0.00127098	0.00858389
CG11768	-1.22227	1.06165	0.0012742	0.00859949
CG8800	1.09981	3.48467	0.00127558	0.00859973
CG9132	-0.65938	6.7216	0.00127605	0.00859973
Orct	-0.981	4.35567	0.00127894	0.00861306
CG8046	1.262	1.05744	0.00128039	0.00861671
PGRP-LC	0.599069	7.09627	0.00128546	0.00864463
CG10050	0.595482	7.08499	0.00129823	0.00872433
pbl	1.01171	4.11745	0.00131043	0.00880007
mthl7	1.46997	0.392327	0.00131809	0.00884173
CG18869	-1.08672	3.4273	0.0013185	0.00884173
CG13449	1.10911	2.58556	0.00132446	0.00887537
CG8192	1.16262	2.87901	0.00133147	0.00891601
Inx2	0.741799	7.06423	0.0013361	0.00894074
Myc	1.00653	4.17939	0.00134452	0.00899073
Mcm6	2.32395	4.37839	0.00134551	0.00899098
CR45674	-1.25181	0.854773	0.00136113	0.0090889
CG13282	1.43738	0.0404119	0.0013622	0.00908967
CG42663	0.80059	5.13819	0.00136762	0.00911936
CG4096	-0.601658	6.55955	0.00137456	0.00915919
Mtk	1.31934	2.5224	0.00138387	0.00921478
CG8248	-1.03065	3.88504	0.00138987	0.00924823
CG17669	1.04832	3.25035	0.0014044	0.00933829
CG3618	-0.639379	6.14111	0.00141347	0.009392
Asap	-0.597489	6.67576	0.00141543	0.00939845
side	1.10311	3.44737	0.00141812	0.00940969
CG13857	1.36289	0.36817	0.001439	0.00954157
CG31778	1.33268	0.649214	0.00144309	0.00955595
Gal	0.963063	4.26997	0.00144319	0.00955595
CG6013	-0.805466	5.18682	0.00145249	0.00961079
CG14933	1.07193	3.46599	0.0014547	0.00961872
CG9760	1.05192	2.88253	0.00146283	0.00966568
Tret1-1	0.595582	7.11885	0.00147493	0.00973885
CycD	1.78263	4.71142	0.00147629	0.00974101
CG5948	-0.604998	7.01496	0.00148925	0.00981969
asp	2.72415	3.33252	0.00149058	0.00982164
RabX4	-0.749051	5.34886	0.00149167	0.009822
brp	-0.587759	7.05882	0.00150606	0.00990981
GNBP2	0.612195	6.6085	0.00151638	0.0099708
CG8012	0.981853	4.22712	0.00153561	0.0100871
mab-21	0.991991	4.11352	0.0015362	0.0100871
Dyrk2	0.941404	5.10631	0.00153917	0.0100996
CG33965	1.20543	1.69849	0.00155197	0.0101765
CG2837	1.14182	1.99658	0.00155514	0.0101902
CG5882	1.1492	1.56381	0.00156204	0.0102284
mam	0.612085	6.42274	0.00156562	0.0102416
CG10947	0.739961	5.66027	0.00156623	0.0102416
CG14921	1.05302	2.74953	0.00156741	0.0102423
cact	0.711822	8.0383	0.00157209	0.0102645
Mink	2.11686	3.07832	0.00157298	0.0102645
CG12290	-0.528826	7.93556	0.00157985	0.0103022
CG13594	0.80796	5.14289	0.00158455	0.0103257
MFS3	1.12756	1.71341	0.00161798	0.0105364
CG31800	-0.819665	5.11111	0.00162178	0.0105538
CG42269	1.03417	2.83249	0.0016251	0.0105682
CG9850	0.665383	5.7873	0.00163421	0.0106201
mirr	1.06565	2.49501	0.00163611	0.0106251
AsnS	1.2143	4.72812	0.00163868	0.0106276
CG7220	0.599871	6.61142	0.00163873	0.0106276
Cyp4s3	1.05415	2.54727	0.00164185	0.0106333
CG32284	-1.37286	0.135217	0.00164186	0.0106333
kst	0.592468	6.70635	0.00164763	0.0106634
Ote	2.46549	3.60694	0.00165366	0.0106951
vret	2.44301	1.83072	0.00166424	0.0107538
Nrt	0.63389	6.53446	0.00166564	0.0107538
TkR86C	-1.0022	4.05356	0.00166615	0.0107538
CG44837	1.17535	1.102	0.00166859	0.0107622
CG4297	-0.627557	6.30833	0.00168628	0.010869
CG1894	1.13388	3.39051	0.00168944	0.0108819
CG34453	1.06737	2.90291	0.00170288	0.010961
cav	2.25629	3.77392	0.00170868	0.0109909
Rgk3	1.18173	4.37512	0.00171154	0.0110018
CG13931	1.12856	2.71775	0.00171552	0.0110198
CG34377	1.24562	0.933221	0.00171837	0.0110307
Mmp2	0.730841	5.41494	0.00175035	0.0112284
VhaM9.7-b	-0.516999	7.77352	0.001753	0.0112377
CG13722	1.02325	2.91745	0.00176999	0.011339
CG42450	-0.644882	6.09164	0.00177496	0.0113631
bi	-0.731204	5.5045	0.00177911	0.0113792
FK506-bp1	1.8782	5.95636	0.00177989	0.0113792
mir-283	-1.20181	1.28097	0.00178134	0.0113808
Dscam4	1.03317	3.62839	0.00179662	0.0114707
CG17108	0.775651	8.52722	0.00179853	0.0114752
Alas	0.53062	7.72256	0.00180142	0.0114859
LBR	1.76063	4.54217	0.00180528	0.0115028
CG6749	1.12812	1.69339	0.00181009	0.0115256
CG10616	-0.688236	5.64195	0.00181963	0.0115725
dpr4	-0.733249	5.33779	0.0018199	0.0115725
dao	-0.598024	6.38571	0.0018263	0.0116054
CG11147	0.560186	9.31344	0.00183521	0.0116542
CG5023	1.10739	6.03907	0.00185451	0.0117572
Aldh-III	-0.52928	9.52296	0.00185507	0.0117572
CG34394	-0.553796	7.19201	0.00185516	0.0117572
CG7330	1.25803	0.37227	0.00185835	0.0117695
eIF-5A	0.755318	8.89137	0.00186357	0.0117947
CG34034	1.19875	2.44974	0.00186837	0.0118172
dpr6	1.11081	1.86387	0.00188005	0.0118831
CG32052	-1.05936	2.08536	0.00188423	0.0119016
CG15642	-1.00751	4.05631	0.00189083	0.0119326
Cyp313b1	1.12971	2.36611	0.00189165	0.0119326
lost	0.509928	8.41212	0.00190856	0.0120199
CG9512	1.16346	2.23159	0.00190887	0.0120199
gudu	1.02897	2.86864	0.00191034	0.0120199
Obp56a	1.69395	5.92667	0.00191059	0.0120199
CG12880	-1.09154	1.78435	0.00191886	0.0120633
Vha55	-0.515601	9.72466	0.00192003	0.0120633
CG4880	2.54698	3.77818	0.00192147	0.0120643
CG30015	0.517606	7.68158	0.00192325	0.0120675
CG12643	-0.662368	6.08948	0.00192681	0.0120818
CG10433	0.604976	6.72687	0.00193494	0.0121248
ppk	0.88228	4.58599	0.00194065	0.0121525
CG7372	2.30739	4.70719	0.00194699	0.0121841
rhi	2.64513	2.22367	0.00194997	0.0121894
Snmp2	-1.06808	5.41771	0.00195155	0.0121894
CG15894	-0.806758	5.00673	0.00195279	0.0121894
fru	-0.661645	6.04804	0.00195298	0.0121894
CG14947	1.02787	2.83547	0.00196066	0.0122292
NLaz	-0.529396	8.89384	0.00196778	0.0122646
Lip3	-1.04914	2.20476	0.00196892	0.0122646
CG14683	0.703145	6.24615	0.00197186	0.0122748
CG11261	1.1372	2.30976	0.00198253	0.0123331
insc	0.952	4.01818	0.00199595	0.0124052
dpr11	-0.782766	5.04719	0.00199674	0.0124052
Drep2	1.99415	5.35112	0.00200202	0.0124299
CG13436	1.03393	2.87064	0.00201475	0.0125007
Cbl	1.19702	6.26366	0.00202233	0.0125395
osp	-0.51541	7.44593	0.00203722	0.0126236
trol	0.52739	7.87291	0.0020428	0.0126498
CG1943	1.26424	7.07515	0.00205892	0.0127413
CR44566	1.23924	0.410654	0.00208131	0.0128714
CG17839	0.564071	8.78989	0.00208846	0.0129072
CG17684	0.894817	4.61734	0.00209074	0.0129129
CG12693	-1.33304	0.251829	0.00210037	0.0129639
CG6145	-0.572037	7.9995	0.00210273	0.01297
CG5745	-0.556254	7.22266	0.00210872	0.0129985
CG15734	-1.14529	3.41304	0.0021187	0.0130515
l(1)G0469	0.675018	5.75379	0.0021309	0.0131182
Duox	1.29896	3.35687	0.00213861	0.0131571
5-HT1B	1.00373	2.66465	0.00214131	0.0131651
Tsp96F	0.841384	5.33093	0.00214656	0.0131888
CG16799	-0.853874	4.96388	0.0021616	0.0132726
CG17127	1.12808	3.17662	0.00222265	0.0136386
Obp57a	0.753615	6.19767	0.00222702	0.0136518
al	0.96266	3.8301	0.00222768	0.0136518
CG15210	1.04683	2.76651	0.00226486	0.0138706
CG31826	1.01021	3.81475	0.0022708	0.013898
CG43117	-1.35289	0.674533	0.00227681	0.0139258
CG15927	1.02064	2.7592	0.00227836	0.0139263
Doc1	1.21075	0.587038	0.00228343	0.0139416
spn-B	0.906452	4.27813	0.00228382	0.0139416
CG9628	0.539935	8.22368	0.00230574	0.0140664
Dok	1.52283	4.60969	0.00231138	0.0140917
CR44272	-1.05043	3.08179	0.00232414	0.0141604
CG31663	0.802405	5.01982	0.00233733	0.0142315
NtR	1.02512	3.25049	0.00234506	0.0142694
cpo	-0.515233	10.5368	0.00235052	0.0142935
Spn31A	1.02515	3.4564	0.00235845	0.0143325
aos	0.593757	6.35964	0.00236511	0.0143614
pes	0.895947	4.41881	0.00236624	0.0143614
RpL5	0.532503	10.7621	0.00237245	0.0143873
CG43291	-1.36618	2.91266	0.00237355	0.0143873
CG31523	0.509056	7.73163	0.00238222	0.0144306
CG3238	2.36193	2.93536	0.00238715	0.0144512
CG13248	-0.873201	4.49817	0.00239731	0.0145006
CG34253	1.27042	0.0865107	0.00239838	0.0145006
papi	0.718803	5.72471	0.00240205	0.0145135
PICK1	-0.739996	5.43641	0.00241247	0.0145672
CG10026	1.07752	4.02011	0.00241871	0.0145956
Mf	0.949556	8.88677	0.00242629	0.0146319
TpnC73F	1.08139	2.15606	0.00243004	0.0146452
Src64B	1.83561	5.47883	0.00243533	0.0146672
mod	1.4094	7.11122	0.00243678	0.0146672
CG44286	1.0193	2.17901	0.00244602	0.0147135
CG42260	1.17549	0.928795	0.00244764	0.0147138
CG14567	1.15938	2.77262	0.00245167	0.0147212
pr	-0.631516	5.91141	0.00245198	0.0147212
CHKov1	0.680891	5.67953	0.00245686	0.0147412
CG3842	0.535647	6.86972	0.0024637	0.0147728
CG3964	1.42687	0.228037	0.00248361	0.0148828
CG42700	0.739319	5.2123	0.00249784	0.0149525
Pxn	0.958738	4.07615	0.0024984	0.0149525
dpr3	-0.848182	4.63475	0.0025155	0.0150453
Oatp74D	0.843838	4.80062	0.00252345	0.0150833
CG1208	1.34391	1.62772	0.00252881	0.0151032
nop5	2.065	5.21782	0.00252997	0.0151032
stumps	0.825359	4.73124	0.00253228	0.0151075
bbg	1.02366	3.52568	0.002539	0.015138
CG9521	1.05218	2.83896	0.00254793	0.0151817
Pfk	-0.509965	7.83585	0.00255042	0.0151852
CBP	1.70926	1.63787	0.00255173	0.0151852
Cct2	0.750719	5.20889	0.00255745	0.0152097
br	1.02943	2.1575	0.00257577	0.015309
CG5116	-1.03064	2.70434	0.00258597	0.01536
CG7840	2.03027	4.8718	0.0025999	0.015433
CG5888	0.845135	4.66575	0.002604	0.0154477
Snap24	-0.560362	6.98104	0.00261127	0.0154811
CG7497	1.04196	2.96316	0.00261926	0.0155141
l(2)01289	1.09798	5.95494	0.00262011	0.0155141
dpr15	1.06559	1.65154	0.00263076	0.0155674
CG18472	0.981867	3.60676	0.00263646	0.0155914
Vha44	-0.497174	9.09756	0.00264016	0.0156035
Cpr47Ee	-1.18759	4.53426	0.00264256	0.0156079
CG4269	1.04914	2.1053	0.00264847	0.0156331
CG3253	-0.979525	3.69078	0.00266288	0.0157083
ACXD	0.71858	5.3868	0.00266724	0.0157243
CG18031	-1.0327	2.49362	0.00267797	0.0157777
CG9507	1.12706	1.23157	0.0026914	0.0158469
CG14905	1.00539	3.18146	0.00270825	0.0159362
Rel	0.553709	7.33311	0.00271111	0.0159431
CR43417	0.993103	2.99499	0.00273547	0.0160764
Smyd4-3	1.28498	2.03713	0.00275294	0.016169
asl	1.99798	3.59793	0.00277469	0.0162867
Ilp6	0.794417	4.98929	0.00278139	0.0163159
CG18539	1.80758	2.23629	0.00278567	0.0163204
FASN3	1.16327	3.09466	0.00278605	0.0163204
CG5541	1.003	5.46744	0.00278734	0.0163204
Ac13E	0.6772	5.59938	0.00278995	0.0163256
SmydA-9	1.10182	5.51358	0.0028079	0.0164205
CG45122	0.994806	2.1898	0.00283565	0.0165726
CG34273	-1.18466	1.428	0.00284677	0.0166273
yellow-h	0.578064	7.13904	0.00285071	0.01664
en	-0.938367	3.96538	0.00285901	0.0166736
alpha-Est6	1.23548	1.0178	0.00285999	0.0166736
Ir75a	0.510626	7.7728	0.00286202	0.0166751
m	1.13459	0.892196	0.002879	0.0167586
unc-4	0.701573	5.42086	0.00288165	0.0167586
CG42673	0.913793	4.46563	0.00288166	0.0167586
CG10307	0.712336	5.57779	0.00288995	0.0167965
CG5235	2.20628	2.74951	0.00292353	0.0169812
Arl6	-0.602962	6.19663	0.00293586	0.0170419
CR43973	1.16355	2.54602	0.00293757	0.0170419
CG18327	-1.06226	2.77716	0.00295582	0.0171372
CG18547	1.10371	3.07635	0.00296111	0.0171574
CG3078	-0.754528	5.15738	0.00296435	0.0171656
CG5789	0.949985	4.90334	0.00296631	0.0171665
BI-1	-0.494719	8.17199	0.00297267	0.0171928
CG14408	-0.520511	6.9203	0.0029791	0.0172195
Hayan	1.02476	2.93546	0.00299273	0.0172877
CG17032	0.678754	5.591	0.00299947	0.017316
Sse	1.19894	0.670292	0.00300889	0.0173598
CG10479	-0.982597	2.65289	0.003032	0.0174805
CG42337	-0.721949	5.3664	0.00303537	0.0174805
CG34402	1.17896	1.432	0.00303571	0.0174805
atilla	0.530456	8.60437	0.00303719	0.0174805
smg	2.08481	7.06157	0.00304379	0.0175078
CG31326	0.801221	5.04324	0.00308459	0.0177279
Scp1	1.20466	8.7039	0.00308583	0.0177279
FMRFaR	-0.99308	3.30131	0.00308767	0.0177279
CG17841	0.49475	7.62746	0.00308992	0.01773
CG18213	1.70417	3.3376	0.00310265	0.0177923
CR43259	0.969954	2.6589	0.00311966	0.017879
Ras64B	0.614826	5.89285	0.00312297	0.017881
DNaseII	0.986561	3.9701	0.0031238	0.017881
CG12520	1.07548	1.53945	0.00312731	0.0178903
CG15093	1.0207	3.08076	0.0031348	0.0179224
CR45174	-1.14663	1.65901	0.00314197	0.0179525
Hsc70Cb	-0.490802	7.87528	0.00315135	0.0179952
lz	1.14597	1.06074	0.00315343	0.0179962
AttA	0.871447	4.88668	0.00315617	0.018001
Obp56d	0.584955	11.4578	0.00316252	0.0180264
Karl	0.975735	2.8325	0.00317688	0.0180973
KFase	0.836949	4.6631	0.00318077	0.0181086
mei-S332	2.01354	2.53777	0.00318482	0.0181207
SPH93	-1.23057	0.542203	0.00319366	0.0181601
CG30172	0.978266	2.32818	0.00322061	0.0182968
CG42846	0.96976	2.35005	0.00322157	0.0182968
RhoGAP18B	0.553529	6.65194	0.00322918	0.0183214
Vdup1	0.491892	7.62958	0.00322978	0.0183214
CG12470	-1.19573	0.594093	0.00324004	0.0183687
Ork1	0.960589	2.80163	0.00327177	0.0185374
CG6569	-0.882585	4.426	0.00327765	0.0185596
CG31759	1.30356	2.77757	0.00328131	0.0185692
Ef1gamma	0.812831	8.84747	0.00328872	0.0186
Obp19d	0.510174	15.3249	0.00330341	0.018672
prc	1.33206	0.0977217	0.0033289	0.0188048
CG10996	1.12504	1.55398	0.00335424	0.0189366
CG11321	0.974939	5.74265	0.00340607	0.0192178
Mtl	0.806741	5.74077	0.00342385	0.0193066
CG1665	0.982823	3.19522	0.00343134	0.0193373
dgt5	1.64142	2.57097	0.00343846	0.0193659
ImpL2	-0.714659	7.41812	0.0034531	0.0194368
CG6701	0.509556	7.26534	0.00347383	0.0195419
Neurochondrin	1.235	3.61033	0.00348033	0.0195668
Bili	-0.751581	5.12081	0.0035034	0.0196848
CG5280	1.01504	2.00117	0.003518	0.0197551
T48	0.676506	5.54712	0.00352038	0.0197567
CG5621	1.23051	4.2822	0.00352546	0.0197735
Ets65A	0.945621	3.70313	0.00354121	0.0198501
repo	0.635412	5.63795	0.00354865	0.01988
CG8526	1.00732	1.73332	0.00355365	0.0198962
CG30197	0.529491	9.97049	0.00356001	0.0199201
Ncc69	0.495442	8.60064	0.00357114	0.0199705
timeout	1.9457	3.21916	0.00357617	0.0199868
Esp	-0.500467	8.64864	0.00360023	0.0201059
CG15071	1.16247	0.609912	0.00360172	0.0201059
CR43334	1.31401	0.299602	0.00360577	0.0201166
mbm	1.93042	4.16837	0.00360832	0.020119
Wnt6	0.647485	5.61257	0.00361735	0.0201574
Lst	1.29449	3.18426	0.00362847	0.0202075
Nmdar2	1.32456	0.20563	0.00363384	0.0202255
CG13284	-0.614755	6.49789	0.00364765	0.0202905
Lim3	1.16039	0.543439	0.00365169	0.020301
Gk1	-0.555231	6.37612	0.0036593	0.0203313
CG17786	0.96946	3.66883	0.00370532	0.020575
Cyp4e3	1.12897	4.42066	0.0037763	0.0209568
CG31030	-0.530663	6.80209	0.0037878	0.0210083
CG5910	0.693534	5.75521	0.00380196	0.0210745
Sgs1	1.15155	1.45096	0.00382003	0.0211622
Map60	1.98558	5.27454	0.00383257	0.0212193
meso18E	1.14921	1.8912	0.00383883	0.0212415
MtnD	-1.00262	2.27543	0.00385388	0.0213108
Tm2	1.09588	7.79212	0.0038577	0.0213108
Hop	-0.51305	6.89125	0.00385811	0.0213108
CG2082	0.970759	5.83484	0.00386039	0.021311
CG4678	0.680686	5.49824	0.00388276	0.021422
CG13124	0.544332	8.6405	0.00388822	0.0214396
CG42361	-0.754024	4.90095	0.00389942	0.0214757
CG15564	1.10658	1.06953	0.00390057	0.0214757
CG6867	-0.571436	6.21703	0.00390158	0.0214757
CG1674	0.787239	6.49461	0.00391091	0.0215146
CG4629	0.956763	2.81365	0.00392433	0.0215759
CR46064	-0.700738	5.32097	0.00393106	0.0216003
CG9896	1.05667	4.1398	0.00395149	0.0216999
CG1231	1.15339	0.699867	0.00395383	0.0217002
CG31547	1.17516	2.91822	0.00398212	0.0218428
sPLA2	-0.948852	3.96594	0.00399166	0.0218824
CG1791	-0.61233	6.54214	0.00401114	0.0219765
CG3967	-0.496033	6.95335	0.00403058	0.0220703
CG6425	2.51424	2.66768	0.00405702	0.0222021
Ugt36Bb	-1.03178	2.09809	0.00407898	0.0223094
CG11073	0.488506	8.64003	0.00408564	0.0223329
Tango7	0.499268	8.19341	0.00412782	0.0225505
EDTP	0.812235	6.20394	0.0041419	0.0226143
Zasp66	1.01763	8.26279	0.00414636	0.0226256
mino	0.927923	4.60518	0.00415614	0.0226659
Syx4	0.999293	3.58054	0.00418648	0.0228183
Tollo	0.870857	4.18576	0.00420708	0.0229088
CG34383	-0.505606	6.9378	0.00420794	0.0229088
CG43729	0.547088	7.7877	0.00423208	0.023027
Cyp6v1	0.564041	6.12445	0.0042581	0.0231552
CG7079	0.574715	6.33044	0.00426386	0.0231732
Rx	1.04869	1.43465	0.00427025	0.0231947
Vha14-1	-0.51833	7.45393	0.00428877	0.0232726
Cyp12a4	0.575088	6.49566	0.00428952	0.0232726
CG13833	0.502666	9.00286	0.00432241	0.0234376
CG11353	0.971786	2.48428	0.00434362	0.0235391
Keap1	-0.639183	5.62161	0.00434679	0.0235428
CG12177	0.76954	4.81303	0.00436171	0.0236101
miple1	0.8013	4.75876	0.00437419	0.0236635
CG31100	0.534024	6.5629	0.00437657	0.0236635
CG10562	0.508669	7.00283	0.00443676	0.0239752
CG13300	1.16826	0.694821	0.00445987	0.0240864
Oseg5	-0.727059	5.15575	0.00447264	0.0241415
Kebab	1.31953	2.06614	0.00448183	0.0241773
be	0.659702	5.47236	0.0044978	0.0242497
alphaTub67C	1.50327	1.47229	0.00450482	0.0242737
CG13168	1.19958	0.18815	0.00451387	0.0243086
CG31809	-0.541458	7.34578	0.00451673	0.0243102
Trim9	0.976006	1.77036	0.00452807	0.0243574
CG31798	1.01548	1.89614	0.00454654	0.0244428
CG14234	-0.755888	4.82395	0.00455927	0.0244974
CG5404	0.819898	4.60495	0.0045852	0.0246227
Ekar	-0.973182	2.0829	0.0045891	0.0246296
Zip48C	-0.591648	5.8975	0.00460299	0.0246902
CG33181	0.467294	8.21578	0.0046276	0.0247996
CG43094	0.664362	6.05607	0.00462863	0.0247996
GILT1	-0.472324	9.09339	0.00464231	0.0248588
CG9164	0.8799	4.136	0.00470501	0.0251803
Prip	0.724735	5.02115	0.00471115	0.0251989
Vha26	-0.493387	9.49505	0.00472199	0.0252262
glu	1.9825	4.862	0.0047233	0.0252262
CG18536	1.4347	3.84513	0.00472425	0.0252262
NAAT1	0.552723	7.49453	0.00473096	0.0252478
CG11226	1.12908	1.01214	0.00473689	0.0252652
CG4572	0.513591	6.97869	0.00474893	0.0253042
GILT2	1.75639	2.39031	0.00474956	0.0253042
CG4666	1.28886	1.14344	0.00475931	0.0253419
CR44645	1.24735	0.812936	0.00476883	0.0253783
CG42684	-0.509198	6.71717	0.00477368	0.0253899
CG4301	0.951279	2.80345	0.00478832	0.0254534
Cad99C	0.833217	4.40794	0.0048388	0.0257073
CG14636	0.967642	2.60768	0.00488069	0.0259153
CG6330	0.475124	7.45996	0.00494963	0.0262666
18w	0.680565	5.28965	0.00495711	0.0262916
vas	1.1307	0.34749	0.00497051	0.0263479
Fit2	0.759731	4.77695	0.00499165	0.0264451
CG34056	0.81091	4.50379	0.00499528	0.0264495
mys	0.588887	6.7556	0.00500363	0.0264789
CG12868	-0.733422	5.02159	0.00500996	0.0264976
Rab3	-0.475672	7.36266	0.0050279	0.0265777
Chd3	1.19675	0.388751	0.00503734	0.0266127
Cyp4ac3	1.28683	0.950117	0.00504693	0.0266484
GlyS	0.840254	6.84361	0.00505495	0.0266759
CG10345	0.481785	9.28723	0.00511012	0.026952
CR44811	0.920328	3.5577	0.00511809	0.026979
CG14109	1.23807	4.30524	0.00515545	0.0271608
cora	0.470076	8.65567	0.00516636	0.0271975
Ssadh	0.505252	6.83386	0.00516816	0.0271975
CG11448	-0.462565	8.01992	0.00518404	0.0272659
CG7432	1.10526	0.452588	0.00523371	0.0275119
CR32658	-0.697445	5.14184	0.00523749	0.0275165
CR45024	0.95277	2.85677	0.00524373	0.0275175
zfh1	0.863504	4.08311	0.00524527	0.0275175
Fer3	-1.30437	0.324032	0.00524641	0.0275175
CG6972	0.964003	3.60293	0.00526067	0.0275618
Liprin-beta	0.66808	6.35477	0.00526225	0.0275618
CG13332	-0.817825	4.65804	0.0052636	0.0275618
Dhc16F	0.877411	4.00988	0.00527983	0.0276315
Dop1R2	0.909158	3.67325	0.00528533	0.027645
CG4250	0.811511	5.38611	0.00530933	0.0277552
Snap25	0.626377	5.96082	0.00535185	0.027962
pdm3	-0.513012	6.65641	0.00536281	0.0280038
Su(var)3-7	1.39694	5.77751	0.00537412	0.0280474
DNApol-alpha50	1.31999	1.57079	0.00541411	0.0282405
CG7378	0.485122	8.35708	0.00542414	0.0282773
Hex-C	-1.40082	0.444972	0.00546429	0.0284709
CG1971	1.15212	2.57177	0.00546801	0.0284715
Idgf3	0.490388	8.56699	0.00547265	0.0284715
Ire1	-0.525976	6.77324	0.00547344	0.0284715
Ets21C	-0.875112	3.89902	0.00548215	0.0285011
Hr3	-0.839109	4.56682	0.00549563	0.0285556
Rcc1	1.8917	6.28577	0.00552281	0.028681
GstD7	-1.2422	0.361503	0.0055268	0.028686
Cam	0.471304	10.6276	0.00553024	0.0286881
CG6191	-0.9275	3.93273	0.00557186	0.028885
oxt	0.73531	5.45028	0.0055743	0.028885
Xpc	0.968195	6.26533	0.00559652	0.0289843
tn	0.84524	6.39765	0.00563699	0.0291779
Dhc36C	0.686857	5.41845	0.00564727	0.0292151
nompC	0.838936	4.61242	0.00565685	0.0292487
CG8478	1.99935	3.88351	0.00566529	0.0292763
nord	0.985187	1.44038	0.00567404	0.0293055
CG12288	2.52576	2.65677	0.0056844	0.0293307
GstD1	-0.46854	10.6513	0.00568511	0.0293307
CG42825	1.14402	0.259573	0.00570355	0.0294098
Lis-1	-0.457855	8.64494	0.00570792	0.0294163
ara	1.70807	1.29719	0.00572507	0.0294886
CG13506	0.552712	6.935	0.00574238	0.0295617
rempA	-0.566026	5.97512	0.00575379	0.0296043
Ccn	-0.497134	6.77959	0.00576319	0.0296366
CG45078	1.23664	3.88144	0.00576932	0.029652
CG13699	1.19449	3.16951	0.00577571	0.0296687
dgt6	1.55106	3.85287	0.00578462	0.0296984
CG14535	-0.885695	3.78192	0.0057989	0.0297555
Slc45-1	0.83503	4.64511	0.00580969	0.0297867
CG34398	0.54411	6.95466	0.00581127	0.0297867
Cyp28d1	0.75251	4.79542	0.00582204	0.0298258
CG5780	-0.740377	4.81782	0.00582829	0.0298345
CG8545	1.67983	5.10485	0.00583219	0.0298345
trpl	1.18743	0.219807	0.00583321	0.0298345
CG4991	0.713823	5.34461	0.00584171	0.0298619
FucTA	-0.810779	4.55852	0.00584536	0.0298643
CG30403	1.7005	1.25022	0.005867	0.0299587
Tpr2	0.690205	7.1484	0.00587483	0.0299826
Lcp65Ag2	1.01092	1.14136	0.00588982	0.0300428
CG4455	1.22988	3.8244	0.00591327	0.0301462
vn	0.937437	3.5099	0.00592778	0.0302039
dpr16	0.991382	1.46377	0.00596378	0.0303619
by	0.460198	7.6074	0.00596521	0.0303619
TSG101	-0.499424	6.7975	0.00597113	0.0303757
CG13924	0.902616	3.54232	0.00599962	0.030501
CG9657	1.05963	0.956601	0.00600221	0.030501
dpr1	-0.665385	5.21846	0.00602567	0.0305951
CG2918	-0.476767	7.40757	0.00602718	0.0305951
CG9919	-0.527074	6.49503	0.00605339	0.0306927
JhI-21	0.91033	4.89825	0.00605428	0.0306927
Plod	0.787019	4.94757	0.00605615	0.0306927
net	0.967338	2.02844	0.00606106	0.0307011
CG15144	0.993438	1.94336	0.00606668	0.0307132
twi	1.1373	0.386526	0.00610812	0.0308852
Nup93-1	1.43672	4.97388	0.00610903	0.0308852
Oli	-0.905599	2.47403	0.00611044	0.0308852
Dronc	1.54045	4.04422	0.00611985	0.0309162
SP2637	0.491473	6.84486	0.00612982	0.03095
Tis11	0.634248	6.69151	0.00614513	0.0309994
CG7781	-0.455696	8.1698	0.00614616	0.0309994
CG13409	-0.682798	5.13759	0.00617642	0.0311355
CG5065	0.455192	7.53376	0.00621172	0.0312967
CG6800	-0.892089	3.65053	0.00621609	0.0313021
CG34155	0.879503	3.82008	0.00623433	0.0313773
Pgi	-0.462229	8.51051	0.00625017	0.0314403
hui	1.00594	2.36277	0.00625358	0.0314407
sn	1.69286	4.91862	0.00627854	0.0315494
CG31145	-0.478509	7.58349	0.00630781	0.0316797
tilB	0.908878	2.60428	0.00632948	0.0317716
CG14798	-0.908516	2.78252	0.0063657	0.0319365
CG2218	0.94732	5.89382	0.00639978	0.0320905
CG15412	0.975513	4.09439	0.00642337	0.0321917
CG6171	1.02362	4.3014	0.00647305	0.0324235
CG11883	-0.57016	5.85678	0.00648691	0.0324757
CG14625	0.980634	1.57725	0.00654507	0.0327496
CG14507	-0.987254	1.47027	0.00655951	0.0328045
CG42342	0.692184	5.16826	0.00656542	0.0328167
Spn42Dc	-0.893655	3.43165	0.00657132	0.0328288
CG42674	0.586595	6.25479	0.00659384	0.032924
CG10654	0.824208	4.20244	0.00661654	0.0330199
Dp1	0.583682	7.60954	0.00662053	0.0330224
NimB4	1.07336	1.59625	0.00664771	0.0331405
Gfat1	0.521113	6.72378	0.00666538	0.0332111
Cda5	0.787708	5.12862	0.00672063	0.0334687
CG3081	0.918255	3.46945	0.00672956	0.0334806
Cap-D2	1.95439	3.62846	0.00673008	0.0334806
gd	1.21882	0.227918	0.0067489	0.0335565
cnn	0.473864	6.99683	0.00678223	0.0337046
CG33056	0.457352	7.7089	0.00682262	0.0338875
AQP	1.09973	4.36353	0.0068532	0.0340215
CG15739	1.01561	1.04717	0.00687539	0.0341039
DCX-EMAP	0.584973	5.69292	0.00687701	0.0341039
alpha-Man-Ia	0.504019	7.11435	0.00698731	0.0346328
SkpB	1.6575	2.5927	0.00699212	0.0346384
Drgx	0.927481	3.12172	0.00700165	0.0346675
CG2256	0.87772	3.86303	0.00700584	0.0346701
Cyp4d20	0.480428	8.03738	0.00702272	0.0347355
Corin	0.936167	2.99699	0.00704805	0.0348425
fz	1.39332	4.22472	0.00705549	0.0348611
Rcd7	-1.02305	1.70844	0.00706101	0.0348702
CG30345	0.75991	4.76791	0.00708464	0.0349687
PPO3	1.12429	0.483239	0.00709188	0.0349806
CG30460	0.474464	7.00056	0.00709446	0.0349806
Hnf4	-0.466543	7.85575	0.00712463	0.0351111
DAT	0.88283	3.17036	0.00718897	0.0353972
sals	0.933352	5.21563	0.00719017	0.0353972
CG13074	-0.893606	3.0774	0.00720423	0.035448
Inx3	0.529726	6.42913	0.00720933	0.0354546
CG2930	-0.548648	6.51611	0.00722198	0.0354984
CG7110	0.533288	6.14205	0.0072707	0.0357193
Mec2	0.635377	5.70514	0.0073038	0.0358633
Act5C	0.615627	10.3728	0.0073652	0.036146
Oatp58Dc	0.883375	3.16696	0.00739478	0.0362724
5-HT1A	0.831632	4.09356	0.00740087	0.0362828
CG33928	1.14869	0.0529273	0.00740764	0.0362828
CG40498	-0.584958	6.01127	0.00740841	0.0362828
CG5861	0.64644	5.35872	0.00743597	0.0363989
CG34354	0.856526	3.91277	0.00744461	0.0364224
p120ctn	0.613989	7.12178	0.00747739	0.0365624
Prm	0.997555	7.58185	0.00748095	0.0365624
CG5321	0.891128	3.25565	0.00753435	0.0368043
Ctf4	1.02417	1.22591	0.00755914	0.0369064
bark	0.531271	6.17451	0.00757148	0.0369476
CG5177	1.02401	6.3376	0.00758101	0.036975
CG7264	1.09008	0.45456	0.0076014	0.0370278
spz5	0.812632	4.48371	0.00760177	0.0370278
Nlg2	0.994814	0.96933	0.00760356	0.0370278
Act42A	1.50776	5.36013	0.00765009	0.0372351
CG9123	-0.859055	3.85924	0.00765718	0.0372505
axo	0.495952	6.5804	0.00766254	0.0372574
CG5916	-0.844104	3.81598	0.00766775	0.0372636
btl	0.942776	1.94094	0.00767961	0.0372889
Hsp67Ba	1.26428	-0.212148	0.00768084	0.0372889
dac	-0.784672	4.58989	0.0077079	0.0373993
Ptp10D	0.517676	6.5233	0.00771149	0.0373993
Cyp6t1	0.961517	1.46809	0.00771741	0.0374089
CG7328	0.915063	2.89164	0.00772775	0.0374398
CG32264	0.44096	7.5469	0.00775042	0.0375304
beat-Ib	0.868406	3.3743	0.00776488	0.0375812
CG30440	0.662248	5.8881	0.00777245	0.0375913
CG31431	0.940941	3.6833	0.00777492	0.0375913
Nop60B	1.66677	5.61144	0.00781261	0.0377543
Fpps	1.08958	4.45627	0.00782095	0.0377753
CR44587	1.06904	0.854248	0.00784083	0.0378487
CG3918	1.15625	4.969	0.00784415	0.0378487
Aps	0.575509	8.23143	0.0078831	0.0379985
CG15923	0.608572	5.59593	0.00788323	0.0379985
Plc21C	0.473833	6.90177	0.0079028	0.0380735
a	0.640411	5.20682	0.00791532	0.0381144
Cyp49a1	0.829614	4.07136	0.00793365	0.0381796
pon	1.05529	1.86036	0.00794085	0.0381796
Cct5	-0.483847	6.65602	0.00794097	0.0381796
wus	1.3248	1.9803	0.00797892	0.0383426
eIF3-S10	0.608863	7.90847	0.0079862	0.0383581
CR43870	0.857441	3.7679	0.00801158	0.0384604
Gfat2	0.517812	6.37722	0.00804091	0.0385817
Arpc2	1.11039	6.14397	0.00811966	0.0389215
CG15553	-1.09547	4.41605	0.00811996	0.0389215
CG8331	0.453426	8.36074	0.00812816	0.0389411
Eip63E	-0.59571	6.50509	0.00818404	0.039189
CG11241	0.862832	4.15587	0.00823591	0.0394174
ball	1.79167	4.16467	0.00824954	0.0394627
CG31321	0.907269	3.98326	0.00827406	0.03956
CG6999	0.862205	2.34976	0.00832783	0.0397949
CG1888	0.656717	5.17677	0.00833351	0.0397949
Map205	-0.75555	5.14288	0.00833763	0.0397949
Hr96	-0.575837	5.64641	0.00834001	0.0397949
CG30033	0.886939	3.97634	0.00837764	0.0399542
P5CDh1	-0.436438	8.78163	0.00838687	0.0399657
hdc	0.941335	5.73142	0.00838848	0.0399657
CG15890	-0.474994	7.63677	0.00840223	0.040011
CR43464	1.15601	0.0702944	0.00841628	0.0400578
Ten-m	0.530347	6.24422	0.00842569	0.0400824
rumi	1.21348	3.60982	0.00843101	0.0400876
clumsy	1.21126	3.16802	0.00846839	0.0402451
CG5731	0.890321	3.15613	0.00847883	0.0402744
aurA	1.69352	3.29453	0.00849262	0.0403197
Rim2	0.475085	7.43508	0.00851089	0.0403862
CG10804	-0.702426	5.0621	0.00855471	0.0405737
Sb	1.03602	0.840779	0.0085793	0.04067
RhoGEF64C	0.825909	4.08372	0.00859246	0.040712
Poxm	1.01527	1.93096	0.00864713	0.0409505
[truncated: 7,464 more rows]

## Sheet: amos upregulated genes
86 genes upregulated in amos flies
	Symbol	FBgn ID	putative function
	Non coding RNAs
	CR32111	FBgn0052111	non-coding RNA
	CR42646	FBgn0261429	non-coding RNA
	CR43086	FBgn0262532	non-coding RNA
	CR43170	FBgn0262789	non-coding RNA
	CR43650	FBgn0263659	non-coding RNA
	CR43671	FBgn0263746	non-coding RNA
	CR44646	FBgn0265857	non-coding RNA
	CR45600	FBgn0267160	non-coding RNA
	CR45822	FBgn0267472	non-coding RNA
	CR45835	FBgn0267485	non-coding RNA
	CR45955	FBgn0267617	non-coding RNA
	CR46254	FBgn0267987	non-coding RNA
	Metabolism and biotransformation
	Cyp6a14	FBgn0033302	cytochrome p450
	Cyp6a19	FBgn0033979	cytochrome p450
	Cyp6a8	FBgn0013772	cytochrome p450
	Cyp6a9	FBgn0013771	cytochrome p450
	Cyp6g1	FBgn0025454	cytochrome p450
	Gld	FBgn0001112	dehydrogenase
	CG14219	FBgn0031033	Acyltransferase
	CG42329	FBgn0259229	Acyltransferase
	CG7997	FBgn0034117	alpha-galactosidase
	CG8665	FBgn0032945	hydroxymethyl-, formyl- and related transferase
	CG1673	FBgn0030482	leucine biosynthesis
	CG17097	FBgn0265264	lipase
	Mal-A5	FBgn0050359	maltose alpha-glucosidase activity
	CG1461	FBgn0030558	Tyrosine transaminase
	CG17324	FBgn0027074	UDP-glycosyltransferase
	CG31683	FBgn0051683	O-acyltransferase
	CG6337	FBgn0033873	cysteine-type endopeptidase
	Immune defense
	DptB	FBgn0034407	antimicrobial peptide
	CG34215	FBgn0085244	immune defense response
	IM14	FBgn0067905	immune defense response
	PPO1	FBgn0283437	melanization defense response
	Chitin
	Tb	FBgn0243586	chitin
	TwdlT	FBgn0029170	chitin cuticle
	CG14247	FBgn0039454	chitin metabolism
	Mur89F	FBgn0038492	chitin metabolism
	Cht5	FBgn0038180	chitinase
	GPCRs and signaling
	CCHa2-R	FBgn0033058	GPCR
	mthl3	FBgn0028956	GPCR
	mthl4	FBgn0034219	GPCR
	Rh4	FBgn0003250	GPCR
	Ser	FBgn0004197	Notch ligand
	Serine protease and inhibitors
	ea	FBgn0000533	serine protease
	CG17278	FBgn0046763	serine protease
	CG4927	FBgn0034139	serine-type endopeptidase
	CG8170	FBgn0033365	serine-type endopeptidase
	CG2816	FBgn0031564	serine-type endopeptidase inhibitor
	Spn42De	FBgn0033115	serine-type endopeptidase inhibitor
	Spn43Ab	FBgn0024293	serine-type endopeptidase inhibitor
	Spn85F	FBgn0037772	serine-type endopeptidase inhibitor
	Spn88Eb	FBgn0038299	serine-type endopeptidase inhibitor
	Other
	ninaD	FBgn0002939	CD36 family, lipid binding and transport
	CG14694	FBgn0037845	MFS transporter
	Tim17a2	FBgn0037307	mitochondrial transport
	Hsp23	FBgn0001224	heat shock protein
	Hsp26	FBgn0001225	heat shock protein
	caup	FBgn0015919	transcription factor
	Hr83	FBgn0037436	transcription factor
	Gr98b	FBgn0046887	Gustatory receptor
	Obp57e	FBgn0050145	Odorant binding protein
	CG5758	FBgn0032666	cell adhesion
	nAChRbeta1	FBgn0000038	ion channel- nicotonic acetylcholine receptor
	tut	FBgn0052364	RNA binding protein
	CG10336	FBgn0032698	cell cycle
	krimp	FBgn0034098	piRNA regulation
	Unknown
	CG34227	FBgn0085256	unknown
	CG12970	FBgn0034047	unknown
	CG13386	FBgn0032040	unknown
	CG13500	FBgn0034683	unknown
	CG13558	FBgn0034869	unknown
	CG15414	FBgn0031542	unknown
	CG16798	FBgn0032856	unknown
	CG17672	FBgn0083978	unknown
	CG17777	FBgn0040900	unknown
	CG18467	FBgn0034218	unknown
	CG30424	FBgn0050424	unknown
	CG34208	FBgn0085237	unknown
	CG34265	FBgn0085294	unknown
	CG42822	FBgn0262004	unknown
	CG43236	FBgn0262881	unknown
	CG6912	FBgn0038290	unknown
	CG7509	FBgn0035575	unknown
	CG8861	FBgn0037676	unknown
	tfc	FBgn0035199	unknown
	Tsp42Er	FBgn0033139	unknown

## Sheet: Cufflinks
Symbol	FBgn ID	CS S1	CS S2	CS S3	CS avg	SEM
CR40469	FBgn0058469	0	0	1.59987	0.53329	0.53329
CG17636	FBgn0025837	0.0426518	0.0533681	0	0.0320066	0.0162996
CG42376	FBgn0259722	42.9201	43.8961	43.0185	43.2782	0.310236
MED22	FBgn0040339	30.366	27.4417	26.8402	28.216	1.08895
CR43297	FBgn0262989	0	0	0	0	0
tRNA:Glu-CTC-3-4	FBgn0011851	0	0	0	0	0
tRNA:Glu-CTC-3-5	FBgn0011852	0	0	0	0	0
tRNA:Glu-CTC-3-6	FBgn0011853	0	0	0	0	0
tRNA:Glu-CTC-3-7	FBgn0052324	0	0	0	0	0
CG32320	FBgn0052320	0	0	0	0	0
tRNA:Glu-CTC-3-8	FBgn0011854	0	0	0	0	0
tRNA:Glu-CTC-3-9	FBgn0011855	0	0	0	0	0
CG9168	FBgn0035216	0	0.0579667	0	0.0193222	0.0193222
FucTD	FBgn0035217	0	0	0.0299514	0.0099838	0.0099838
CG9173	FBgn0035218	0	0	0	0	0
Lim1	FBgn0026411	2.58501	1.82825	2.11745	2.1769	0.220471
SA-2	FBgn0043865	0	0	0	0	0
CR44842	FBgn0266116	0.042677	0.0268722	0.0218509	0.0304667	0.00627487
rho	FBgn0004635	5.15291	5.07684	5.3872	5.20565	0.0933934
CG32319	FBgn0052319	0	0	0	0	0
stet	FBgn0020248	0.752947	0.559095	0.455802	0.589281	0.0870961
robl62A	FBgn0028567	0	0.119542	0.0681087	0.0625502	0.0346205
CR43701	FBgn0263839	0	0	0	0	0
snoRNA:Psi28S-2622	FBgn0086670	3.59471	5.20098	3.33898	4.04489	0.58274
CG12084	FBgn0043458	9.21065	9.14292	8.6714	9.00832	0.169592
CR45812	FBgn0267462	1.68321	2.09364	3.04376	2.27354	0.402925
CR45537	FBgn0267097	0.0297207	0	0	0.0099069	0.0099069
hfp	FBgn0028577	59.2314	42.4255	51.0566	50.9045	4.85204
scaRNA:MeU2-48	FBgn0263471	0	0	7.96767	2.65589	2.65589
Psa	FBgn0261243	8.56552	7.86344	8.10931	8.17942	0.205683
cue	FBgn0011204	15.1926	15.9491	16.0322	15.7246	0.267096
Iml1	FBgn0035227	10.2786	7.93493	9.56067	9.25807	0.693271
Ir62a	FBgn0053971	1.91541	1.42586	1.19787	1.51305	0.211674
CG12091	FBgn0035228	46.1906	41.2989	42.6231	43.3709	1.46077
pns	FBgn0035229	8.6642	8.09149	8.53141	8.42903	0.17307
CG32313	FBgn0052313	0.277483	0.268909	0.212369	0.25292	0.0204262
Cct1	FBgn0041342	35.007	31.4164	34.4398	33.6211	1.11443
CG12075	FBgn0030065	5.04687	5.18061	5.00134	5.07627	0.0537985
CR45813	FBgn0267463	0.736522	0.479003	0.501317	0.572281	0.0823729
Cct2	FBgn0035231	8.27484	8.85496	8.5091	8.5463	0.168496
CG12099	FBgn0035232	45.5	43.975	43.6689	44.3813	0.566287
Pex10	FBgn0035233	8.57719	9.72349	10.047	9.44923	0.445908
CG7879	FBgn0035235	4.50793	3.82591	4.20501	4.17962	0.197291
CG12003	FBgn0035234	0.768414	0.346583	0.571626	0.562208	0.121863
CG12004	FBgn0035236	39.8021	37.7558	35.889	37.8156	1.13001
CG13917	FBgn0035237	9.57438	8.5946	8.54047	8.90315	0.335979
CG12104	FBgn0035238	8.25881	9.26097	8.09814	8.53931	0.3638
CG33791	FBgn0035240	0.0927641	0.0726211	0.108574	0.0913197	0.0104038
Moe	FBgn0011661	115.91	120.725	115.651	117.429	1.64986
CG18170	FBgn0035239	2.17196e-07	7.94911e-07	1.0407e-06	6.84269e-07	2.44077e-07
CG12105	FBgn0035241	0.272135	0.156225	0.129008	0.185789	0.0438819
CG13926	FBgn0035243	13.0247	13.0559	14.6611	13.5806	0.540342
CR45814	FBgn0267464	7.6289	9.61193	8.82636	8.68906	0.576553
ABCB7	FBgn0035244	17.1329	17.3261	17.3663	17.2751	0.0720408
CG33230	FBgn0053230	4.55432	4.58291	4.12941	4.42221	0.146634
GC	FBgn0035245	4.75912	2.19294	3.58675	3.51294	0.741711
CG13928	FBgn0035246	90.5525	87.7143	91.5511	89.9393	1.14924
nSyb	FBgn0013342	150.375	158.665	157.263	155.434	2.56184
metl	FBgn0035247	15.4438	14.3358	13.8178	14.5325	0.479575
CG1885	FBgn0030066	6.79408	7.28769	7.43832	7.17336	0.194563
Bgb	FBgn0013753	12.6485	13.0096	13.8622	13.1734	0.359814
alphaCOP	FBgn0025725	16.3737	17.6859	17.2203	17.0933	0.384085
CG13919	FBgn0035248	9.46032	8.25032	7.37784	8.36283	0.603786
CG17249	FBgn0035249	4.61644	4.1783	3.59792	4.13089	0.294976
Bro	FBgn0013755	0.133588	0	0	0.0445293	0.0445293
CR45815	FBgn0267465	5.00715	4.32931	4.7409	4.69245	0.197169
CG13920	FBgn0025712	20.4398	15.8212	15.6689	17.31	1.56553
Vta1	FBgn0035251	54.6891	55.716	55.7099	55.3717	0.341288
CG7970	FBgn0035252	72.5729	86.3457	82.2849	80.4012	4.0859
CG7971	FBgn0035253	38.9193	32.033	34.9729	35.3084	1.99497
Rbm13	FBgn0030067	5.66599	5.52293	5.89851	5.69581	0.109441
CG7974	FBgn0035254	3.43581	3.97617	3.89803	3.77	0.168612
Uhg7	FBgn0083121	1.02497	0.685018	0.534846	0.748278	0.144979
snoRNA:Me28S-A2634c	FBgn0082944	0	0	0	0	0
snoRNA:Me28S-A2634b	FBgn0082945	0	0	0	0	0
snoRNA:Me28S-A2634a	FBgn0082946	0	0	0	0	0
RpL23A	FBgn0026372	577.198	606.572	580.544	588.105	9.28405
RabX5	FBgn0035255	0	0	0	0	0
CG13930	FBgn0035256	0.547895	0.829306	0.647212	0.674804	0.0823995
CG7991	FBgn0035260	0.292793	0.389409	0.383759	0.35532	0.0313062
CG12011	FBgn0035257	0.0247901	0	0	0.00826337	0.00826337
e(r)	FBgn0011586	42.0341	47.5154	42.5227	44.0241	1.75136
CG13931	FBgn0035258	3.03366	2.68749	3.32858	3.01658	0.185264
drpr	FBgn0027594	19.6126	17.0487	18.3609	18.3407	0.740203
CG18171	FBgn0035262	0.333295	0.396743	0.292982	0.341007	0.0302004
CG12035	FBgn0035263	0.334098	0.155629	0.127645	0.205791	0.0646603
Oseg4	FBgn0035264	5.54112	5.94684	5.72073	5.73623	0.117377
CG18173	FBgn0035265	0.11277	0	0	0.03759	0.03759
Gk2	FBgn0035266	9.83833	9.36583	8.57085	9.25834	0.369816
CG13921	FBgn0035267	0.246434	0.27062	0.238306	0.251787	0.00970459
Cht2	FBgn0022702	1.05817	1.85117	2.01944	1.64293	0.296386
CG8001	FBgn0035268	5.38735	5.25798	5.55423	5.39985	0.0857482
rdgA	FBgn0261549	4.73806	4.02353	4.174	4.31186	0.21748
Dhc62B	FBgn0013811	0.197155	0.17181	0.149725	0.172897	0.0137026
CG13933	FBgn0035270	10.6396	11.2415	10.2295	10.7035	0.293883
CR44351	FBgn0265451	6.49419	6.6432	6.41084	6.51608	0.0679634
CG12018	FBgn0027903	3.24057	2.59382	3.11973	2.98471	0.198532
CG2021	FBgn0035271	20.5861	22.5652	14.4618	19.2044	2.43914
mRpL46	FBgn0035272	11.9133	11.7756	11.8354	11.8414	0.0398649
alpha-Spec	FBgn0250789	31.2453	29.2618	27.5464	29.3512	1.06871
CR45834	FBgn0267484	0	0	0.346346	0.115449	0.115449
dlt	FBgn0024510	1.08522	1.28285	1.16583	1.17797	0.0573727
Cdc37	FBgn0011573	24.0981	25.0035	24.8726	24.6581	0.282522
CR44111	FBgn0264942	4.43186	5.05788	6.81119	5.43364	0.712086
CR45818	FBgn0267468	53.0911	44.8814	45.1899	47.7208	2.68663
CG12020	FBgn0035273	0	0	0	0	0
Patj	FBgn0067864	8.95486	8.80951	9.24321	9.00253	0.127447
JTBR	FBgn0025820	21.7649	20.6326	20.5424	20.98	0.393329
CG42676	FBgn0261562	8.92788	8.69314	8.77251	8.79784	0.0689373
CR45686	FBgn0267246	5.03823	4.2263	4.01959	4.42804	0.310876
CR45687	FBgn0267247	0	0	0.288501	0.096167	0.096167
GV1	FBgn0027790	61.9935	66.6622	53.6927	60.7828	3.79259
Cpr62Ba	FBgn0035279	0.505642	0.418137	0.458967	0.460915	0.0252793
Cpr62Bb	FBgn0035280	13.9114	6.70034	9.23289	9.94821	2.11216
CG3708	FBgn0040345	0.0734307	0	0.0751544	0.0495284	0.0247692
CG12661	FBgn0030071	0	0	0	0	0
Cpr62Bc	FBgn0035281	0.572167	0.22627	0.417262	0.405233	0.100033
CNMa	FBgn0035282	0	0.164556	0	0.054852	0.054852
CG12024	FBgn0035283	12.1639	11.4498	11.0006	11.5381	0.338706
Rap1	FBgn0004636	19.8209	20.8432	21.3434	20.6692	0.448039
HBS1	FBgn0042712	7.50119	7.43463	8.09419	7.67667	0.209642
CG12025	FBgn0035285	15.6831	15.8724	15.8522	15.8026	0.0600173
CG13924	FBgn0035286	2.37059	2.28905	2.0752	2.24495	0.0880769
dre4	FBgn0002183	5.97359	6.71372	6.10795	6.26509	0.227645
CG13937	FBgn0035287	45.1701	42.9328	48.1201	45.4077	1.50215
Aprt	FBgn0000109	7.8467	7.89388	6.25156	7.33071	0.539749
CG43255	FBgn0262900	0	0	0	0	0
Tmhs	FBgn0262624	0.133074	0.125726	0.0339139	0.0975713	0.0318993
dsb	FBgn0035290	3.97802	4.27003	4.18018	4.14274	0.0863493
Dbx	FBgn0261723	0	0	0	0	0
tRNA:Cys-GCA-2-1	FBgn0052312	0	0	0	0	0
CR45826	FBgn0267476	0	0	0	0	0
CG5687	FBgn0035293	139.064	156.15	153.943	149.719	5.36546
CR44536	FBgn0265729	0	0	0.0378316	0.0126105	0.0126105
Mfap1	FBgn0035294	10.7242	10.4073	10.8648	10.6654	0.135298
mu2	FBgn0002872	1.43408	1.17777	1.19404	1.26863	0.0828582
Cnb	FBgn0035295	1.21529	1.63909	1.82804	1.56081	0.181165
mir-4964	FBgn0263519	0	0	0	0	0
mv	FBgn0265988	2.34479	2.03899	2.04414	2.14264	0.101086
SCOT	FBgn0035298	31.4831	32.2324	24.6159	29.4438	2.42362
CR45827	FBgn0267477	0.0450364	0.159812	0.184601	0.129816	0.0429898
CR45828	FBgn0267478	0	0	0	0	0
CG1927	FBgn0027547	550.111	590.832	552.081	564.341	13.2575
CG11815	FBgn0035299	0	0	0	0	0
CG1139	FBgn0035300	0.697733	0.922038	0.946592	0.855454	0.0791786
CG42841	FBgn0262030	0	0	0	0	0
CR44535	FBgn0265728	0.0193868	0	0	0.00646227	0.00646227
CG42357	FBgn0259703	0.0362213	0	0	0.0120738	0.0120738
CR43836	FBgn0264384	0.0662475	2.95288e-08	4.14663e-07	0.0220826	0.0220824
CG42356	FBgn0259702	0	0	0	0	0
CG34259	FBgn0085288	0	0	0	0	0
CG42355	FBgn0259701	0	0	0	0	0
sls	FBgn0086906	3.82114	1.45157	1.58311	2.28527	0.768872
CR42860	FBgn0262107	9.29315	5.07817	6.12529	6.8322	1.26706
zormin	FBgn0052311	11.3503	7.86256	7.59993	8.9376	1.20873
CR45802	FBgn0267452	5.71797	4.67783	4.95498	5.11693	0.310989
CG15822	FBgn0035308	0.471965	0.253746	0.421111	0.382274	0.0659194
CG15879	FBgn0035309	3.37621	2.32182	2.93193	2.87665	0.305628
CG5704	FBgn0026570	16.1743	19.0076	17.2106	17.4642	0.827671
CG10962	FBgn0030073	1.48688	1.13313	1.22031	1.28011	0.106406
CR15821	FBgn0035311	0	0	0	0	0
CG15820	FBgn0035312	0	0	0.0390717	0.0130239	0.0130239
CG13810	FBgn0035313	0	0	0	0	0
CG5707	FBgn0026593	27.1345	26.6579	25.9631	26.5852	0.340104
CG8960	FBgn0035315	0.0509566	0	0.0853333	0.04543	0.0247881
CG15878	FBgn0035316	3.44082	3.66787	3.66949	3.59273	0.0759548
Oseg2	FBgn0035317	11.4132	11.2073	10.8479	11.1561	0.165181
CG9018	FBgn0035318	14.2807	15.8437	15.5882	15.2375	0.484069
ACXD	FBgn0040507	3.63708	3.47329	4.44165	3.85067	0.299247
CG32301	FBgn0052301	0	0	0	0	0
CG12662	FBgn0030074	0.0978952	0.124028	0.300357	0.174093	0.0635809
CG32305	FBgn0052305	0	0	0	0	0
CG1275	FBgn0035321	25.0561	24.5789	23.3649	24.3333	0.503415
CG2034	FBgn0015359	10.1076	10.6391	10.9973	10.5813	0.258453
oxt	FBgn0015360	5.20421	4.68299	5.38551	5.0909	0.210565
CG13807	FBgn0035323	17.3688	14.5558	14.8211	15.5819	0.896726
ecd	FBgn0000543	8.27636	8.20398	8.50871	8.32968	0.0919196
CG13806	FBgn0035325	0.0436171	0	0	0.014539	0.014539
CR45829	FBgn0267479	0	0	0	0	0
obst-I	FBgn0052304	0	0	0	0	0
CG32302	FBgn0052302	0	0	0	0	0
mir-31b	FBgn0262369	0	0	0	0	0
yellow-g	FBgn0041709	0.105841	0.0867563	0.0360723	0.0762232	0.0208177
tRNA:Cys-GCA-3-1	FBgn0052303	0	0	0	0	0
yellow-g2	FBgn0035328	0	0	0	0	0
MsR2	FBgn0264002	0.12345	0.02184	0.0362475	0.0605125	0.0317424
CR45427	FBgn0266976	0	0	0	0	0
CR45426	FBgn0266975	0	0	0	0	0
MsR1	FBgn0035331	0.618467	0.782863	0.729887	0.710406	0.0484464
CG13801	FBgn0035332	0	0	0.0247565	0.00825217	0.00825217
CG1317	FBgn0035333	33.3699	35.9685	36.2538	35.1974	0.917454
CG8993	FBgn0035334	106.995	101.799	104.507	104.434	1.5004
Nost	FBgn0259734	2.44136	2.1921	2.26749	2.30032	0.0738034
mRpL23	FBgn0035335	24.0841	31.5801	30.6014	28.7552	2.35258
CG9004	FBgn0035336	2.52681	2.83196	2.79606	2.71828	0.0962926
CG15877	FBgn0035337	3.29342	4.3212	3.38792	3.66751	0.32798
CG45186	FBgn0266696	28.6908	24.044	27.4649	26.7332	1.39041
CG42787	FBgn0261858	0	0.48784	0.1886	0.22548	0.142029
CG32299	FBgn0052299	0	0	0.104513	0.0348377	0.0348377
CG32298	FBgn0052298	0	0.0445688	3.33003e-07	0.0148564	0.0148562
CG16762	FBgn0035343	0	0.0728744	0.296754	0.123209	0.089286
Cyp4d20	FBgn0035344	52.821	63.5963	62.5406	59.6526	3.42938
CG1146	FBgn0035346	7.84839	5.55672	5.38487	6.26333	0.794083
CG15365	FBgn0030077	2.45759	2.07077	2.12706	2.21847	0.120658
CG16758	FBgn0035348	1.72557	5.19948	0.676064	2.5337	1.36689
CR45425	FBgn0266974	0	0	0.099946	0.0333153	0.0333153
Spn	FBgn0010905	6.4379	5.25758	5.59626	5.76391	0.350889
CR45170	FBgn0266680	0.0966804	0.123478	0.196667	0.138942	0.0298813
CG32295	FBgn0260480	0	0.0535991	0	0.0178664	0.0178664
msn	FBgn0010909	9.29145	8.24773	8.77742	8.7722	0.301307
RpL8	FBgn0261602	527.438	557.607	538.925	541.323	8.79121
dos	FBgn0016794	4.96738	5.2856	5.387	5.21333	0.126409
CG16984	FBgn0062517	3.68922	3.34643	2.82575	3.28713	0.251019
CG12182	FBgn0028504	2.03894	1.63899	1.77358	1.81717	0.117495
CG10970	FBgn0030078	0.203277	2.2714e-11	0.035692	0.0796563	0.0626632
CG16985	FBgn0035355	25.7456	29.2155	23.6006	26.1872	1.63585
CG16986	FBgn0035356	20.1109	21.0277	18.6678	19.9355	0.686868
Pxn	FBgn0011828	1.25604	1.21435	1.21457	1.22832	0.0138601
CR45981	FBgn0267643	0	0	0	0	0
CR45982	FBgn0267644	0	0	0	0	0
CR45660	FBgn0267220	0	0	0	0	0
CG42245	FBgn0250911	2.0161	2.24788	1.84136	2.03511	0.117737
MEP-1	FBgn0035357	9.76447	9.37359	9.75565	9.63124	0.128848
CG14949	FBgn0035358	0.518007	0.0640579	0.212003	0.264689	0.133665
CG1143	FBgn0035359	23.2406	17.8218	22.1422	21.0682	1.65388
CG3706	FBgn0040342	0.149351	0.294439	0.0920274	0.178606	0.0602343
CR45538	FBgn0267098	0	0	0.259163	0.0863877	0.0863877
CG1246	FBgn0035360	0.374992	0	0.223584	0.199525	0.108917
ProRS-m	FBgn0027082	5.12273	5.09177	5.16019	5.1249	0.0197808
CG42304	FBgn0259200	3.90899	3.67547	3.95804	3.8475	0.0871727
Fife	FBgn0264606	2.14215	1.66837	1.94241	1.91764	0.137328
CG33233	FBgn0053233	0.188507	0.0660262	0.133473	0.129335	0.0354176
CG33234	FBgn0053234	0.0707825	0	0	0.0235942	0.0235942
Mrtf	FBgn0052296	1.67608	1.53647	1.29835	1.50363	0.11027
Acp62F	FBgn0020509	0.124296	0	0.127502	0.0839327	0.0419765
Non2	FBgn0035370	28.4789	31.4311	32.1056	30.6719	1.11364
CG44325	FBgn0265413	72.812	68.9227	65.0332	68.9226	2.24555
AhcyL1	FBgn0035371	26.0591	28.521	27.012	27.1974	0.716707
CG12093	FBgn0035372	28.3821	29.2303	28.8523	28.8216	0.245336
Atg2	FBgn0044452	4.96316	4.06853	4.26256	4.43142	0.271708
mRpS35	FBgn0035374	18.4999	18.2584	19.7563	18.8382	0.464314
pgant6	FBgn0035375	3.91903	3.81824	3.51891	3.75206	0.120151
Tet	FBgn0263392	1.31426	0.96269	1.02518	1.10071	0.108288
CR44531	FBgn0265724	0	0	0	0	0
spz5	FBgn0035379	3.68744	4.23794	3.50312	3.8095	0.220729
Shab	FBgn0262593	12.1411	8.15596	10.0109	10.1027	1.15133
CG9970	FBgn0035380	0.0293331	0.0367211	0	0.0220181	0.0112137
CG7246	FBgn0030081	2.84419	2.91544	3.4255	3.06171	0.183054
CG32846	FBgn0052846	0.375033	0.0850123	0.247109	0.235718	0.0839153
CG34025	FBgn0054025	0.665729	0.382958	0.114285	0.387657	0.159206
Or63a	FBgn0035382	0.173306	0.0365926	0.175998	0.128632	0.0460264
CR44530	FBgn0265723	0	0	0	0	0
CPT2	FBgn0035383	8.37914	8.70966	7.10933	8.06604	0.487779
CG2113	FBgn0035384	0	0	0	0	0
FMRFaR	FBgn0035385	1.82391	1.62899	1.72607	1.72632	0.0562687
CG32488	FBgn0052488	0	0	0	0	0
CG32487	FBgn0052487	0	0	0	0	0
aly	FBgn0004372	0	0	0	0	0
HP1b	FBgn0030082	12.2281	13.663	13.4458	13.1123	0.446524
CG2162	FBgn0035388	20.8015	19.4307	20.7109	20.3144	0.442607
Jafrac2	FBgn0040308	8.78493	9.26571	8.90886	8.9865	0.144116
scramb2	FBgn0035390	27.0159	30.9386	28.774	28.9095	1.13441
Sk2	FBgn0052484	5.04199	4.64614	4.4953	4.72781	0.163013
CG32485	FBgn0052485	26.7015	28.9777	25.9077	27.1956	0.920027
CG1271	FBgn0035392	13.9055	13.6832	13.9561	13.8483	0.083816
CG16753	FBgn0035393	4.14601	4.57656	4.8576	4.52672	0.206924
CG32486	FBgn0266918	47.4876	45.2767	47.1109	46.6251	0.682897
CG11486	FBgn0035397	23.6049	19.4226	20.8242	21.2839	1.22901
snRNA:U5:63BC	FBgn0003938	36.6266	0	21.8857	19.5041	10.64
APC4	FBgn0052707	3.5842	3.14875	3.10522	3.27939	0.152922
Cht7	FBgn0035398	0.174847	0.0548468	0.101184	0.110293	0.0349392
tRNA:Cys-GCA-1-1	FBgn0052288	0	0	0	0	0
tRNA:Cys-GCA-1-2	FBgn0052289	0	0	0	0	0
tRNA:Cys-GCA-1-3	FBgn0052287	0	0	0	0	0
tRNA:Lys-CTT-1-12	FBgn0052285	0	0	0	0	0
tRNA:Lys-CTT-1-13	FBgn0052272	0	0	0	0	0
tRNA:Cys-GCA-1-4	FBgn0052286	0	0	0	0	0
CG45066	FBgn0266436	0	0	0	0	0
CG45067	FBgn0266437	0	0.103911	0.0337489	0.0458866	0.0306043
prominin-like	FBgn0026189	3.11634	3.38763	3.6159	3.37329	0.144389
CG32708	FBgn0052708	6.02221	5.7788	5.03904	5.61335	0.295627
tRNA:Met-CAT-2-1	FBgn0052273	0	0	2029.08	676.36	676.36
CG11537	FBgn0035400	21.52	20.7468	22.5193	21.5954	0.513062
CR45819	FBgn0267469	0.275653	0	0.278726	0.184793	0.0924008
CG1291	FBgn0035401	12.2969	12.4815	11.8263	12.2016	0.195054
Usp5	FBgn0035402	7.13976	9.17162	8.01042	8.10727	0.588543
BtbVII	FBgn0263108	16.1325	14.5302	14.5318	15.0648	0.533834
ND-30	FBgn0266582	123.617	113.945	119.322	118.961	2.79788
CG15812	FBgn0035405	5.60576	5.25997	6.49477	5.78683	0.367774
rasp	FBgn0024194	1.97601	2.40369	2.29336	2.22435	0.128191
Asciz	FBgn0035407	3.28697	3.85282	3.48703	3.54227	0.165666
CG32706	FBgn0052706	2.70624	3.16607	2.37934	2.75055	0.228187
CG32280	FBgn0052280	55.761	58.5965	51.9221	55.4265	1.93398
CG32278	FBgn0052278	42.1683	48.8531	44.5036	45.175	1.95872
CG32281	FBgn0052281	2.7851	3.80089	2.21127	2.93242	0.464758
CG14963	FBgn0035409	2.17354	1.00785	2.29338	1.82492	0.409999
CG14964	FBgn0035410	2.11312	0.802637	1.07718	1.33098	0.39902
Girdin	FBgn0283724	4.01515	4.27915	4.38831	4.22754	0.11077
CG42494	FBgn0260026	1.23622	1.22199	1.06923	1.17581	0.0534498
CG32284	FBgn0052284	2.19978	2.01464	2.12412	2.11285	0.0537417
CG14957	FBgn0035412	0	0	0.153623	0.0512077	0.0512077
CG42525	FBgn0260430	0	0	0	0	0
CG6999	FBgn0030085	1.49004	1.95449	2.03607	1.82687	0.170052
CG14958	FBgn0035413	0	0	0	0	0
CG14965	FBgn0035414	1.23366	1.17912	0.863016	1.09193	0.115536
Hsp83	FBgn0001233	182.143	184.66	181.835	182.879	0.894762
CG14966	FBgn0035415	10.1514	10.8097	11.9513	10.9708	0.525793
CG32276	FBgn0047135	201.843	212.515	203.691	206.016	3.29283
gry	FBgn0286567	15.0422	15.0959	16.6219	15.5867	0.517849
CG32271	FBgn0052271	91.1778	93.3057	97.0998	93.8611	1.73194
CG33159	FBgn0053159	68.8456	84.5425	84.06	79.1494	5.15377
CG32277	FBgn0052277	0.120798	0.457916	0.435105	0.33794	0.10877
CG33160	FBgn0053160	0.354112	0.441057	0.435385	0.410185	0.0280841
CG7033	FBgn0030086	30.4712	32.1359	32.0383	31.5485	0.53937
CG32269	FBgn0052269	0.175221	0.298533	0.382552	0.285435	0.0602085
CG14967	FBgn0035420	4.13582	3.89246	3.70154	3.90994	0.12567
CG12034	FBgn0035421	6.65788	7.21265	6.12139	6.66397	0.315034
RpL28	FBgn0035422	709.038	782.673	727.173	739.628	22.15
snoRNA:Or-CD12	FBgn0086068	0	0	0	0	0
snoRNA:Me28S-C3351	FBgn0086069	0	0	0	0	0
snoRNA:Or-CD11c	FBgn0086070	0	0	0	0	0
snoRNA:Or-CD11b	FBgn0086071	0	0	0	0	0
snoRNA:Or-CD11a	FBgn0086072	0	0	0	0	0
mir-13b-2	FBgn0262421	0	0	0	0	0
CG17737	FBgn0035423	212.054	248.704	227.686	229.481	10.618
CG11505	FBgn0035424	5.50377	4.37355	4.7178	4.86504	0.334469
CG17746	FBgn0035425	12.6471	13.7115	12.6944	13.0177	0.347185
CG12078	FBgn0035426	0.0611135	0	0	0.0203712	0.0203712
CR45424	FBgn0266973	0	0	0	0	0
CG43389	FBgn0263246	0	0	0	0	0
CR43626	FBgn0263617	0.01265	0.0204466	0.0162699	0.0164555	0.0022526
mir-282	FBgn0262368	0	0	0	0	0
ckd	FBgn0035427	0.039475	0.0508086	0.0360859	0.0421232	0.00445156
CG34265	FBgn0085294	1.27848	1.31448	0.993207	1.19539	0.101624
CG32815	FBgn0052815	12.5735	11.7849	12.0354	12.1313	0.232641
CG7766	FBgn0030087	23.5619	19.7467	20.5888	21.2991	1.1572
CG14960	FBgn0035428	0	0	0	0	0
CG12017	FBgn0035429	0	0.0196893	0	0.0065631	0.0065631
CG12009	FBgn0035430	0	0	0	0	0
mir-955	FBgn0262269	0	0	0	0	0
CG14968	FBgn0035431	9.28509	9.47098	9.74463	9.50023	0.133462
ZnT63C	FBgn0035432	14.7884	15.6462	14.0978	14.8441	0.447852
Drsl2	FBgn0052279	0.253381	0.331405	0	0.194929	0.100033
Drsl3	FBgn0052283	0	0	0	0	0
Drsl4	FBgn0052282	72.5793	111.966	122.634	102.393	15.2217
Drsl5	FBgn0035434	9064.29	10500.5	11183.7	10249.5	624.56
Bx42	FBgn0004856	13.2057	12.3984	12.7609	12.7883	0.233451
PIG-C	FBgn0035435	2.70242	2.6872	3.19821	2.86261	0.167858
CG12016	FBgn0035436	25.3812	25.2765	24.4443	25.034	0.296395
Strip	FBgn0035437	13.5744	13.6811	13.6025	13.6193	0.0319309
PHGPx	FBgn0035438	503.135	541.032	527.369	523.845	11.0809
CR45380	FBgn0266929	0.98598	0.98296	0.250195	0.739712	0.24476
CG14961	FBgn0035439	1.77866	1.3511	1.86837	1.66604	0.159587
CG14969	FBgn0035440	18.4192	19.5131	18.8425	18.9249	0.31846
Drsl1	FBgn0052274	0	0	0	0	0
Drsl6	FBgn0052268	0	0	0	0	0
Arfrp1	FBgn0030088	11.0316	13.167	13.1536	12.4507	0.709577
kst	FBgn0004167	2.94184	2.4585	2.55136	2.65057	0.148083
Drs	FBgn0283461	4.33549	1.70073	3.46091	3.16571	0.774779
YT521-B	FBgn0027616	26.9518	17.6739	25.618	23.4146	2.89604
CG12010	FBgn0035443	1.68659	1.54903	1.35002	1.52855	0.0976977
CG12012	FBgn0035444	27.5554	31.9345	27.9246	29.1382	1.40222
CG12014	FBgn0035445	1.32145	1.14168	1.1333	1.19881	0.0613677
CR45737	FBgn0267301	0	0.119148	0	0.039716	0.039716
sty	FBgn0014388	4.22748	4.71227	4.92073	4.62016	0.205355
mir-2282	FBgn0262260	0	0	0	0	0
eIF5B	FBgn0026259	9.04249	10.0901	9.84304	9.65854	0.316176
AP-1gamma	FBgn0030089	15.7682	13.8955	14.8386	14.8341	0.540607
armi	FBgn0041164	2.03575	2.19057	2.03131	2.08588	0.0523624
CycJ	FBgn0010317	0.063433	0.120267	0.162872	0.115524	0.0288034
CG14971	FBgn0035449	5.91909	6.99891	5.76159	6.22653	0.388857
CG32267	FBgn0052267	33.869	45.1801	39.2554	39.4348	3.26647
CG42324	FBgn0259224	2.85064	2.67863	2.58705	2.70544	0.0772636
CG43074	FBgn0262484	0	0	0.0708381	0.0236127	0.0236127
ImpE2	FBgn0001254	0.0493034	0	0	0.0164345	0.0164345
Eip63E	FBgn0005640	10.2601	10.0321	10.0617	10.118	0.0715785
CR45043	FBgn0266403	0	0	0	0	0
CR45820	FBgn0267470	0	0	0	0	0
CR45539	FBgn0267099	0	0	0	0	0
snRNA:U7	FBgn0053504	0	0	0	0	0
CG10359	FBgn0035452	1.93331	1.46851	1.46002	1.62061	0.156368
CG10357	FBgn0035453	172.944	237.687	201.81	204.147	18.7262
CG14974	FBgn0040694	0	0	0	0	0
dar1	FBgn0263239	0.819315	0.79535	0.702185	0.772283	0.0357254
CG10862	FBgn0035455	0	0	0.0414606	0.0138202	0.0138202
CG43098	FBgn0262544	0	0	0	0	0
CR43484	FBgn0263495	0	0	0	0	0
CR43485	FBgn0263496	0	0	0	0	0
CR45675	FBgn0267235	0	0	0	0	0
fend	FBgn0030090	0.224019	0.133837	0.164002	0.173953	0.0265045
CG43089	FBgn0262535	0	0	0	0	0
CG32264	FBgn0052264	14.8522	15.5612	17.3226	15.912	0.734396
ppk27	FBgn0035458	0	0	0	0	0
CG32266	FBgn0052266	0	0	0	0	0
ntc	FBgn0035461	7.05697	6.22634	7.4189	6.90074	0.353014
IntS10	FBgn0035462	2.11322	2.63422	2.19949	2.31564	0.161223
CG32262	FBgn0052262	12.7111	15.4135	13.1129	13.7458	0.841862
CG32263	FBgn0052263	0	0	0	0	0
CG12006	FBgn0035464	16.0992	16.3069	15.7079	16.038	0.175603
Scsalpha	FBgn0004888	75.942	73.0873	69.8866	72.972	1.74899
CR44517	FBgn0265710	0	0	0	0	0
CR43932	FBgn0264553	0	0	0.171419	0.0571397	0.0571397
CR45034	FBgn0266394	0	0	0	0	0
Acp63F	FBgn0015585	0	0	0	0	0
enc	FBgn0004875	5.20497	4.48713	4.77343	4.82184	0.208632
Rdh	FBgn0064227	0.125036	0.159827	0	0.0949543	0.0485278
Awh	FBgn0013751	0	0	0	0	0
CR45379	FBgn0266928	0	0	0	0	0
CR43917	FBgn0264518	0	0	0	0	0
CR45422	FBgn0266971	0	0	0	0	0
Fie	FBgn0026592	113.865	131.273	126.052	123.73	5.15763
CG7065	FBgn0030091	3.67116	3.50188	3.61827	3.5971	0.0499998
snRNA:U11	FBgn0083987	0.707838	1.41294	2.88573	1.66884	0.641591
Gr63a	FBgn0035468	13.7945	18.1387	18.1727	16.702	1.45377
CG14977	FBgn0035469	35.1859	35.4984	37.5171	36.0671	0.730574
Ccz1	FBgn0035470	9.26127	9.9296	9.2873	9.49272	0.218568
Ubi-p63E	FBgn0003943	36.4485	37.8667	36.8621	37.0591	0.421082
Sc2	FBgn0035471	98.9771	117.926	114.576	110.493	5.83861
ida	FBgn0041147	2.11399	2.04207	1.92123	2.02576	0.0562392
mge	FBgn0035473	52.7083	51.379	53.9011	52.6628	0.728423
Eip63F-1	FBgn0004910	13.9281	11.6519	12.2293	12.6031	0.683146
Eig63F-2	FBgn0004911	0.865026	0.736451	0.884181	0.828553	0.0463816
fh	FBgn0030092	8.03974	7.94712	8.35057	8.11248	0.122012
CG10866	FBgn0035475	19.2167	18.5542	19.5126	19.0945	0.283333
CG12766	FBgn0035476	0.665166	0.500912	0.956421	0.7075	0.133187
CR43916	FBgn0264517	18.759	17.2996	18.4534	18.1707	0.444378
CG10863	FBgn0027552	68.808	73.2221	74.1913	72.0738	1.6567
CG14982	FBgn0035477	4.68517	3.82281	4.75274	4.42024	0.299351
CG10853	FBgn0035478	0	0	0	0	0
CG14983	FBgn0035479	0	0	0	0	0
CG14984	FBgn0035480	44.0482	43.8194	35.938	41.2685	2.66608
CG12605	FBgn0035481	4.06354	3.36497	3.47597	3.63483	0.216738
CG43915	FBgn0264516	0	0	0	0	0
Bap111	FBgn0030093	7.83536	7.92157	8.75192	8.16962	0.292213
scrt	FBgn0004880	4.53057	3.55105	3.90662	3.99608	0.286279
CG14985	FBgn0035482	2.88259	2.76805	2.47058	2.70707	0.122783
fd64A	FBgn0004895	0	0	0	0	0
Mul1	FBgn0035483	5.37015	4.98434	4.59828	4.98426	0.22282
CG11594	FBgn0035484	4.92593	4.09898	3.89898	4.30796	0.314331
Gr64a	FBgn0045479	0.853535	0.832377	1.14903	0.944981	0.102207
Gr64c	FBgn0045477	5.45475	4.64973	4.81941	4.97463	0.245006
Gr64b	FBgn0045478	4.61395	4.67919	5.11643	4.80319	0.157748
Gr64d	FBgn0035486	0.200287	0.170638	0.261457	0.210794	0.0267384
Gr64e	FBgn0045476	2.96025	2.32626	3.06095	2.78249	0.229958
TRAM	FBgn0040340	7.97402	7.23194	8.77857	7.99484	0.446595
His3.3B	FBgn0004828	227.909	257.107	235.184	240.067	8.77518
CR45042	FBgn0266402	3.34409	3.01763	2.74475	3.03549	0.173245
Gr64f	FBgn0052255	30.176	30.6496	31.3849	30.7368	0.351694
CG11593	FBgn0035488	11.7686	11.8754	11.326	11.6567	0.168183
Rcd5	FBgn0263832	12.7456	14.1304	11.7744	12.8835	0.683603
CG1136	FBgn0035490	3.73707	3.91934	2.93583	3.53075	0.302076
Dpy-30L2	FBgn0035491	0	0.158794	0.257045	0.138613	0.0748854
CG18869	FBgn0042179	4.40925	4.34585	3.71752	4.15754	0.22077
dib	FBgn0000449	2.72721	2.64021	3.28345	2.88362	0.201485
wit	FBgn0024179	8.70788	10.0466	9.15089	9.30179	0.393752
CG32259	FBgn0052259	0.0715283	0.0964372	0.154555	0.107507	0.0245985
Ost48	FBgn0014868	39.6393	42.4476	42.4816	41.5228	0.941818
Faa	FBgn0016013	10.6352	11.8299	10.5065	10.9905	0.421325
Gad1	FBgn0004516	0.0284982	0	0.0146365	0.0143782	0.00822774
CG14989	FBgn0035495	0.0545122	0	0	0.0181707	0.0181707
CG14990	FBgn0035496	0.315319	0.338706	0.0924721	0.248832	0.0784711
CG14995	FBgn0035497	24.2448	21.0098	22.427	22.5605	0.936248
Fit1	FBgn0035498	12.6126	10.4008	10.6692	11.2275	0.696854
CR45670	FBgn0267230	0	1.00597	0	0.335323	0.335323
Ack	FBgn0028484	7.25994	7.1095	6.76911	7.04618	0.145184
Chd64	FBgn0035499	20.4838	19.6377	18.1732	19.4316	0.674929
ens	FBgn0264693	24.8678	24.3913	23.6932	24.3174	0.341083
Dlip1	FBgn0040467	3.54247	2.76072	3.70486	3.33602	0.291443
RfC4	FBgn0260985	6.94725	7.88468	6.69042	7.17412	0.362935
Rop	FBgn0004574	51.1844	54.4454	55.8157	53.8152	1.37358
Ras64B	FBgn0003206	14.2594	14.071	12.5105	13.6136	0.554242
Akh	FBgn0004552	0.367958	0.923418	0.368089	0.553155	0.185132
CG32260	FBgn0052260	2.45743	3.19955	4.90871	3.5219	0.725746
CG1299	FBgn0035501	47.1526	46.7893	48.7311	47.5577	0.596016
nab	FBgn0259986	0.11699	0.0250449	0.0200167	0.0540172	0.0315198
mas	FBgn0011653	0	0	0	0	0
CR44529	FBgn0265722	0	0	0.117796	0.0392653	0.0392653
Ero1L	FBgn0261274	15.2092	14.3305	15.0918	14.8772	0.275426
CG9034	FBgn0040931	187.524	207.455	178.519	191.166	8.54929
CG18675	FBgn0040696	1.53048	0.758222	0.839295	1.04267	0.245027
Teh4	FBgn0035504	8.96529	7.56829	8.00552	8.1797	0.412576
Teh2	FBgn0035505	42.4055	36.5247	39.1693	39.3665	1.7005
Teh3	FBgn0040697	5.60843	5.77805	5.53792	5.64147	0.0712605
VhaM9.7-c	FBgn0028664	23.4253	27.1071	26.1646	25.5657	1.10423
tipE	FBgn0003710	14.5323	11.9297	13.2863	13.2494	0.751532
CG43367	FBgn0263110	4.89635	4.04367	4.48783	4.47595	0.246219
CG15005	FBgn0035508	0.0343685	0.0428656	0.0175647	0.0315996	0.0074338
Cpr64Aa	FBgn0035510	0	0.0703606	0.0585504	0.0429703	0.021754
Cpr64Ab	FBgn0035511	0	0.143261	0	0.0477537	0.0477537
Zpr1	FBgn0030096	5.25776	6.77022	6.30834	6.11211	0.447498
Cpr64Ac	FBgn0035512	23.4389	31.9021	32.891	29.4107	2.9995
Cpr64Ad	FBgn0035513	0.278935	0.430897	0.288741	0.332858	0.0491013
CR32252	FBgn0052252	2.33292	1.84767	2.146	2.10886	0.141305
ImpL2	FBgn0001257	48.0402	42.5082	40.8176	43.7887	2.18107
CR45738	FBgn0267302	0.918708	1.00028	2.68342	1.53414	0.575124
CG14997	FBgn0035515	8.76178	9.1848	8.1262	8.69093	0.307638
pav	FBgn0011692	0.0240975	0.0150489	0.0493561	0.0295008	0.0102655
ago	FBgn0041171	5.38812	4.46874	5.26839	5.04175	0.288582
CG1265	FBgn0035517	28.7804	23.0804	22.7209	24.8606	1.96266
CG15011	FBgn0035518	2.7874	2.06078	2.53788	2.46202	0.213159
CG44532	FBgn0265725	0	0	0.0877917	0.0292639	0.0292639
CG1309	FBgn0035519	30.9751	33.4478	31.191	31.8713	0.79071
CG11586	FBgn0035520	14.4322	13.1891	13.5616	13.7276	0.368329
VhaM9.7-a	FBgn0035521	82.3635	86.6979	88.146	85.7358	1.7372
CG1273	FBgn0035522	0.0360812	0.0226301	0	0.0195704	0.0105275
CG33764	FBgn0053764	0	0	0	0	0
CG1311	FBgn0035523	11.0244	11.6095	10.9421	11.192	0.210098
CG11583	FBgn0035524	8.0464	9.78601	9.23346	9.02196	0.513196
srw	FBgn0261952	0	0.139862	0	0.0466207	0.0466207
CG1316	FBgn0035526	23.957	21.5847	24.829	23.4569	0.969355
TfIIEbeta	FBgn0015829	15.0553	15.3785	13.5823	14.672	0.552797
mei-P26	FBgn0026206	2.41108	1.4432	1.71124	1.85517	0.288522
Hexo1	FBgn0041630	13.8979	15.346	13.1922	14.1454	0.633941
CG15012	FBgn0035528	77.2849	80.7913	78.1447	78.7403	1.05511
Fdx2	FBgn0035529	25.1845	32.5679	26.578	28.1101	2.26489
dyl	FBgn0066365	0.0159747	0.0197578	0	0.0119108	0.00605472
Claspin	FBgn0052251	0.0202397	0.0785745	0.0411275	0.0466472	0.0170645
PMP34	FBgn0052250	42.3521	46.4245	43.8178	44.1981	1.19088
CG15014	FBgn0035532	8.4079	8.11176	8.0542	8.19129	0.109574
Cip4	FBgn0035533	12.9358	11.6227	12.8901	12.4829	0.430286
CR45156	FBgn0266649	0	0	0.0301639	0.0100546	0.0100546
mRpS6	FBgn0035534	16.2198	15.3644	17.136	16.2401	0.511517
CG12115	FBgn0030097	0	0	0.0642602	0.0214201	0.0214201
CG33514	FBgn0053514	0.496432	0.141919	0.429277	0.355876	0.108721
CG11342	FBgn0035537	1.21179	1.97879	2.01857	1.73638	0.262548
DopEcR	FBgn0035538	46.8011	34.3989	40.8748	40.6916	3.58138
CR44360	FBgn0265467	0.090342	0.116389	0.0931699	0.099967	0.0082515
CG32240	FBgn0052240	0.180938	0.227127	0.0926206	0.166895	0.0394584
slow	FBgn0035539	4.52543	4.15019	4.41818	4.3646	0.111586
Syx17	FBgn0035540	19.666	19.8659	20.5495	20.0271	0.267482
CG15019	FBgn0035541	26.6202	28.7815	29.1511	28.1843	0.789278
DOR	FBgn0035542	105.001	86.7865	72.0141	87.9339	9.53976
CG15020	FBgn0035543	0	0	0.0156539	0.00521797	0.00521797
CG12057	FBgn0030098	0.27636	0.171441	0.123235	0.190345	0.0452027
nAChRbeta1	FBgn0000038	0.172168	0.174489	0.230259	0.192305	0.0189887
CG15021	FBgn0035544	24.4483	31.0637	30.2681	28.5934	2.08522
CR45739	FBgn0267303	0	0	0	0	0
CG12607	FBgn0035545	0	0	0	0	0
CG11345	FBgn0035546	0	0	0	0	0
CG15022	FBgn0035547	0	0	0	0	0
CG15023	FBgn0035548	0	0	0	0	0
CG15024	FBgn0040699	0	0	0	0	0
CG32241	FBgn0052241	0.0336284	0	0.0682536	0.0339607	0.0197038
CG32249	FBgn0052249	0.0806188	0.49967	0.165635	0.248641	0.127891
CG12056	FBgn0030099	23.4488	22.7621	23.0329	23.0813	0.199703
CG32248	FBgn0052248	0.235053	0	0	0.078351	0.078351
CG11349	FBgn0035550	0	0	0	0	0
CG7465	FBgn0035551	0	0	0	0	0
CG11350	FBgn0035552	0.161812	0	0.251136	0.137649	0.0734965
CG13722	FBgn0035553	0.968563	0.829545	1.01602	0.938043	0.0559519
CR44709	FBgn0265920	0	0.042001	0	0.0140003	0.0140003
CG13721	FBgn0035554	0.457762	0.248805	0.468328	0.391632	0.0714784
CG13720	FBgn0035555	0	0	0	0	0
NT1	FBgn0261526	0.0216335	0.014407	0.0473099	0.0277835	0.0099836
Tie	FBgn0014073	25.541	24.2943	23.9322	24.5892	0.487261
CG3704	FBgn0040346	8.32701	8.65194	7.9085	8.29582	0.215179
CG12106	FBgn0030100	9.48033	11.4035	9.88255	10.2555	0.585646
CG11353	FBgn0035557	0.583676	0.632146	0.746511	0.654111	0.0482723
CG32243	FBgn0052243	8.18771	7.42903	7.6759	7.76421	0.223419
CG11357	FBgn0035558	6.29327	5.6468	6.39455	6.11154	0.234202
CG33777	FBgn0053777	2.23379	2.17086	2.05467	2.15311	0.0524639
CG42540	FBgn0260657	73.5422	68.5584	75.5875	72.5627	2.08739
Src64B	FBgn0262733	2.00261	1.59305	1.7511	1.78225	0.119251
CG32246	FBgn0052246	0.0280883	0	0	0.00936277	0.00936277
CR45438	FBgn0266987	3.10465	3.7174	1.89182	2.90462	0.536406
HDAC1	FBgn0015805	15.4571	15.2754	15.0262	15.2529	0.124898
axo	FBgn0262870	4.81793	4.60741	4.88715	4.77083	0.0841178
CG12118	FBgn0030101	15.4513	14.9703	14.088	14.8365	0.399194
CG13716	FBgn0035563	0	0.266902	0.200962	0.155955	0.0802671
CG32238	FBgn0052238	2.45949	2.27482	2.10609	2.28013	0.102052
CR45830	FBgn0267480	0.80216	0.94681	0.943668	0.897546	0.0477016
CG32236	FBgn0046793	0	0	0	0	0
CG34266	FBgn0085295	0.308727	0.197205	0.154468	0.220133	0.0459828
CG7514	FBgn0035567	0	0	0	0	0
CG18418	FBgn0035568	0	0	0	0	0
RhoGEF64C	FBgn0035574	0.706483	0.728157	0.710169	0.714936	0.00669543
CG15876	FBgn0035569	0	0	0	0	0
CG13713	FBgn0042199	0	0	0	0	0
su(r)	FBgn0086450	1.89902	1.98305	2.23389	2.03865	0.100587
CR43879	FBgn0264471	0	0	0	0	0
CG13712	FBgn0035570	0	0	0	0	0
CR45983	FBgn0267645	0	0	0	0	0
CR43882	FBgn0264474	0	0	0	0	0
CR45984	FBgn0267646	0	0	0	0	0
CG12493	FBgn0035571	0.149683	0	0	0.0498943	0.0498943
CR43881	FBgn0264473	0	0	0	0	0
CG13711	FBgn0035572	0	0	0	0	0
CR45821	FBgn0267471	0.0418685	0	0.0429239	0.0282641	0.0141354
CR45740	FBgn0267304	0	0.517147	0	0.172382	0.172382
SmydA-9	FBgn0030102	12.8568	3.75956	5.405	7.34045	2.79878
CR44528	FBgn0265721	0.0401898	0	0	0.0133966	0.0133966
CG7509	FBgn0035575	0.418998	0.504592	0.565632	0.496407	0.0425269
CG18808	FBgn0042131	0.151453	0.18952	0.155979	0.165651	0.012006
Dhc64C	FBgn0261797	4.78489	4.09402	4.12328	4.33406	0.225572
LeuRS-m	FBgn0027085	4.88421	5.25028	4.66717	4.93389	0.170152
CG13708	FBgn0035577	1.75394	1.26213	1.58637	1.53415	0.144355
CG13707	FBgn0035578	3.42008	3.43493	2.41003	3.08835	0.339185
CG32237	FBgn0052237	0	0	0	0	0
CG32235	FBgn0047330	0.272003	0.11534	0.18582	0.191054	0.0453004
Dnah3	FBgn0035581	0.611735	0.364986	0.39655	0.457757	0.0775263
Obp8a	FBgn0030103	8.59697	6.5538	8.23122	7.794	0.629023
CG13705	FBgn0035582	0.401276	0.0497254	0.250086	0.233696	0.101814
CG13704	FBgn0035583	0.491087	0	0.251854	0.247647	0.14178
Rh50	FBgn0028699	13.2878	13.1592	12.796	13.081	0.147256
CR43627	FBgn0263618	0.119867	0.0793687	0.357267	0.185501	0.0866751
Con	FBgn0005775	3.5537	3.78301	4.23195	3.85622	0.199186
CG17030	FBgn0035584	0	0	0	0	0
CR45685	FBgn0267245	0	0	0	0	0
CG32232	FBgn0052232	0	0	0	0	0
ATPsynCF6L	FBgn0035585	0	0	0	0	0
CR43884	FBgn0264476	0	0	0	0	0
CG15368	FBgn0030104	1.59282	0.87053	1.03875	1.16737	0.218199
CR46198	FBgn0267917	0	0	0	0	0
CR34047	FBgn0054047	0.0313071	0	0	0.0104357	0.0104357
CG4597	FBgn0035594	0	0	0	0	0
CG15212	FBgn0040842	0	0.201213	0.487915	0.229709	0.141568
CG15213	FBgn0040843	0.731602	0.310673	0.248349	0.430208	0.151767
CG4603	FBgn0035593	20.1953	19.0747	19.6887	19.6529	0.323984
CR45160	FBgn0266653	12.9846	11.3456	13.3658	12.5653	0.619715
CG10674	FBgn0035592	51.9064	49.5133	48.0104	49.81	1.13442
CG4611	FBgn0035591	3.35796	2.77112	3.71578	3.28162	0.275358
Prpk	FBgn0035590	10.4265	10.2243	9.66678	10.1059	0.227167
CG15369	FBgn0030105	0.972713	0.178454	0.163575	0.438247	0.267267
CHMP2B	FBgn0035589	23.8623	20.8596	21.2531	21.9917	0.942189
CG10672	FBgn0035588	63.5143	70.0751	67.7039	67.0978	1.91803
Gdap1	FBgn0035587	25.0274	27.1401	21.4174	24.5283	1.67074
CR45985	FBgn0267647	1.27152	1.72692	1.27683	1.42509	0.150923
CG10671	FBgn0035586	21.6346	22.9955	20.8269	21.819	0.632774
AlaRS-m	FBgn0028962	4.43188	4.14393	3.62017	4.06533	0.237594
Gen	FBgn0263831	1.01398	1.02805	0.984693	1.00891	0.0127705
Srp54k	FBgn0010747	21.2254	22.551	22.7165	22.1643	0.471875
shep	FBgn0052423	16.2997	14.8277	14.801	15.3095	0.495177
CG4669	FBgn0035598	0	0	0.0230609	0.00768697	0.00768697
t	FBgn0086367	12.0082	11.442	12.6739	12.0414	0.356005
CR45741	FBgn0267305	0	0	0	0	0
CR45742	FBgn0267306	0	0	0	0	0
tRNA:Ser-AGA-2-5	FBgn0011986	0	0	0	0	0
lama	FBgn0016031	20.3775	21.8934	22.4352	21.5687	0.615793
tRNA:Val-TAC-1-1	FBgn0052420	0	0	0	0	0
tRNA:Val-TAC-1-2	FBgn0052421	0	0	0	0	0
Klp64D	FBgn0004380	26.7606	28.9657	27.5789	27.7684	0.643571
Cyt-c1	FBgn0035600	181.923	161.765	159.227	167.638	7.17981
Uev1A	FBgn0035601	55.0383	61.3254	57.0745	57.8127	1.85208
Membrin	FBgn0260856	14.2938	14.2965	14.2358	14.2754	0.0197987
CG15370	FBgn0030107	0	0	0	0	0
Pfdn4	FBgn0035603	60.3018	61.4161	57.8186	59.8455	1.06327
CR44515	FBgn0265708	0.0881965	0	0.0901481	0.0594482	0.0297294
CR44516	FBgn0265709	0	0	0	0	0
CR45743	FBgn0267307	0.757739	0.740917	0.674093	0.72425	0.0255442
Ir64a	FBgn0035604	16.6177	18.2908	16.8454	17.2513	0.52389
DIP-delta	FBgn0085420	0.340405	0.312356	0.506898	0.386553	0.0607148
CG4835	FBgn0035607	0	0.0123093	0.00976981	0.0073597	0.00375216
CR44520	FBgn0265713	0	0	0	0	0
blanks	FBgn0035608	2.3059	2.21012	2.35722	2.29108	0.0431058
CR44518	FBgn0265711	0	0.139297	0.107849	0.082382	0.0421795
Gr8a	FBgn0030108	0.0725162	0	0.0373694	0.0366285	0.0209369
CR44519	FBgn0265712	0	0	0	0	0
CG34342	FBgn0085371	72.8563	78.0818	78.537	76.4917	1.82244
Lkr	FBgn0035610	0.234676	0.243164	0.225853	0.234564	0.00499757
CG13285	FBgn0035611	74.2353	75.3159	68.4955	72.6822	2.11648
frm	FBgn0035612	0.100076	0.0222689	0.0707399	0.0643616	0.0226863
sinu	FBgn0010894	15.3476	16.0347	16.3488	15.9104	0.295632
Sucb	FBgn0029118	17.8217	18.2702	17.7899	17.9606	0.155072
Sras	FBgn0029121	1.61596	2.01579	2.31849	1.98341	0.203448
bc10	FBgn0040239	28.2176	27.1072	26.8633	27.396	0.416774
Msr-110	FBgn0015766	1675.44	1942.21	1986.43	1868.03	97.1358
mus81	FBgn0040347	1.96437	1.74275	1.77347	1.82686	0.0693229
CG12121	FBgn0030109	12.0531	12.6166	12.6619	12.4439	0.19582
snmRNA:357	FBgn0065097	0	0	0	0	0
l(3)psg2	FBgn0035617	1.49255	1.40613	1.68937	1.52935	0.0838091
spo	FBgn0003486	0.394771	0.263058	0.288697	0.315509	0.0403164
CG10592	FBgn0035619	2.16045	0	0	0.72015	0.72015
CG5150	FBgn0035620	1.68823	0	0	0.562743	0.562743
CG10591	FBgn0035621	0.0991581	0	0.0506232	0.0499271	0.0286266
TM9SF3	FBgn0035622	10.2245	10.2588	10.5	10.3278	0.086684
mthl2	FBgn0035623	0.576051	0.737178	0.524198	0.612476	0.0641228
Eaf6	FBgn0035624	7.12755	6.86662	7.19618	7.06345	0.100389
Blimp-1	FBgn0035625	6.16175	6.03568	5.73145	5.97629	0.127717
Ir8a	FBgn0052704	22.2886	27.6664	25.6594	25.2048	1.56899
lin-28	FBgn0035626	0.598041	0.375939	0.304456	0.426145	0.0883903
sif	FBgn0085447	5.50647	4.7623	4.99549	5.08809	0.219756
Sse	FBgn0035627	0.0990359	0.347564	0.162258	0.202953	0.0745734
CG44521	FBgn0265714	0	0	0	0	0
snoRNA:Me18S-A1494	FBgn0086073	0	0	0	0	0
DnaJ-1	FBgn0263106	54.6927	56.6977	57.4805	56.2903	0.830148
Usp47	FBgn0016756	20.1837	17.7474	17.9759	18.6357	0.776822
CG10576	FBgn0035630	29.4902	31.0232	31.7407	30.7514	0.663729
snoRNA:Psi18S-1397	FBgn0083044	0	0	0	0	0
mir-4916	FBgn0263578	0	0	0	0	0
snoRNA:684	FBgn0065058	0	0	0	0	0
snoRNA:Psi28S-1837c	FBgn0082994	0	0	8.04239	2.6808	2.6808
snoRNA:Psi28S-1837b	FBgn0082995	0	0	0	0	0
snoRNA:Psi28S-1837a	FBgn0086660	0	0	0	0	0
CR43603	FBgn0263488	0	0	0	0	0
Txl	FBgn0035631	39.0983	40.5065	39.7859	39.7969	0.40655
Ppat-Dpck	FBgn0035632	12.6143	12.6281	11.622	12.2881	0.33309
CR45831	FBgn0267481	9.13464	10.637	9.66728	9.81297	0.439769
scny	FBgn0260936	7.35181	7.09734	7.58052	7.34322	0.139548
vito	FBgn0052418	7.25274	6.90681	6.82842	6.99599	0.130354
mxc	FBgn0260789	1.08777	1.01032	1.1317	1.0766	0.035482
Myt1	FBgn0040298	3.59007	4.30394	4.24818	4.0474	0.229229
PGRP-LD	FBgn0260458	0.945213	0.715237	0.602	0.75415	0.100969
Pmi	FBgn0044419	22.6391	24.3338	24.0941	23.689	0.529491
CR45026	FBgn0266384	3.87577	3.72969	3.7747	3.79339	0.0431923
Cralbp	FBgn0035636	0.87744	0.57457	0.674861	0.708957	0.0890776
Bre1	FBgn0086694	4.40157	4.03819	4.35204	4.26393	0.113774
Tektin-C	FBgn0035638	11.9438	11.4481	11.1685	11.5201	0.226689
S6k	FBgn0283472	6.06961	5.45589	5.01214	5.51255	0.306577
CG42272	FBgn0259167	0.129198	0	0.154142	0.0944467	0.0477692
kri	FBgn0035639	42.8825	42.8824	41.7057	42.4902	0.39225
Larp7	FBgn0260771	3.68787	3.40729	3.33778	3.47765	0.10701
mad2	FBgn0035640	1.4187	1.00624	0.812025	1.07899	0.178869
vn	FBgn0003984	0.677794	0.479543	0.750373	0.635903	0.080939
CG5568	FBgn0035641	0	0	0	0	0
CG18586	FBgn0035642	0	0	0	0	0
CG13287	FBgn0035643	0	0	0	0	0
DNApol-epsilon58	FBgn0035644	0	0.0351458	0.0290456	0.0213971	0.0108425
CG5592	FBgn0035645	0	0	0.0327572	0.0109191	0.0109191
CG32409	FBgn0052409	4.43524	4.86584	4.6321	4.64439	0.124455
QC	FBgn0052412	18.6481	20.4749	16.6477	18.5902	1.1052
CG32413	FBgn0052413	0	0	0	0	0
amx	FBgn0000077	7.88023	9.25777	8.53799	8.55866	0.397796
CG10486	FBgn0035647	0	0	0.0202019	0.00673397	0.00673397
CG13288	FBgn0035648	0.210144	0.0879365	0.107833	0.135305	0.037858
CG10483	FBgn0035649	6.21737	5.51396	6.98682	6.23938	0.425321
CR45167	FBgn0266677	2.09851	1.55531	2.21826	1.95736	0.203976
CG32407	FBgn0052407	9.12036	7.24595	5.76581	7.37737	0.970602
CG33523	FBgn0053523	35.0736	31.9335	32.3633	33.1235	0.982929
Rcc1	FBgn0002638	7.26986	6.33114	6.07085	6.55728	0.364125
CG33993	FBgn0053993	0.620602	0.579434	0.782211	0.660749	0.0618829
CG10479	FBgn0035656	2.29165	2.25379	2.93606	2.49383	0.221383
CR45439	FBgn0266988	0	0	0	0	0
Dsor1	FBgn0010269	18.0361	15.298	17.2068	16.847	0.810639
CR45440	FBgn0266989	0	0	0	0	0
PVRAP	FBgn0052406	2.17202	1.68331	2.05544	1.97026	0.147367
alphaKap4	FBgn0035657	0	0	0	0	0
CG10477	FBgn0035661	0.624179	0.0663303	0	0.23017	0.197933
yip7	FBgn0040060	245.129	0	0.137613	81.7555	81.6867
CR43952	FBgn0264603	0	0	0	0	0
CG6462	FBgn0035663	0.335547	0	0.392995	0.242847	0.122551
Jon65Aiv	FBgn0250815	382.69	0.32101	0.47095	127.827	127.431
Jon65Aiii	FBgn0035665	222.199	0.0807773	0.330162	74.2033	73.9979
Jon65Aii	FBgn0035666	0.252791	0.0796682	0	0.11082	0.0746182
CG17754	FBgn0030114	5.0978	4.90658	4.97567	4.99335	0.0559038
Jon65Ai	FBgn0035667	2.55507	0	0	0.85169	0.85169
tant	FBgn0028980	4.28361	3.76111	4.06333	4.03602	0.15145
CR45441	FBgn0266990	0	0	0	0	0
CG6592	FBgn0035669	0.0284334	0.0357887	0.0290967	0.0311063	0.00234903
CG10472	FBgn0035670	4.62888	2.94248	3.26224	3.6112	0.517145
CG42269	FBgn0259164	1.25027	1.04908	1.05603	1.11846	0.0659355
CG6602	FBgn0035673	2.40258	1.99143	2.00606	2.13336	0.134678
CG13295	FBgn0035674	7.296	6.02676	7.67579	6.99952	0.498582
CG6610	FBgn0035675	20.8141	25.7419	16.2705	20.9422	2.73491
ssp6	FBgn0035676	4.51013	3.95577	4.93438	4.46676	0.283331
ric8a	FBgn0028292	2.33979	1.81705	2.27639	2.14441	0.1647
CG13293	FBgn0035677	3.41982	2.71943	3.62633	3.25519	0.274435
CG10469	FBgn0035678	3.80581	4.64984	4.41317	4.28961	0.251361
CG10467	FBgn0035679	9.54751	12.0318	10.3408	10.64	0.732594
loj	FBgn0061492	13.0174	13.6556	14.9329	13.8686	0.563123
Ets65A	FBgn0005658	1.48182	1.31412	1.54269	1.44621	0.0683426
CR46001	FBgn0267663	0	0	0	0	0
l(3)mbn	FBgn0002440	0.0663352	0.0831643	0.118294	0.0892645	0.0153062
CR46005	FBgn0267667	0.107745	0.536932	0.871073	0.50525	0.220922
Lcp65Ag3	FBgn0086611	0.406938	0	0.206877	0.204605	0.117478
Cpr65Au	FBgn0042119	623.943	710.153	643.458	659.185	26.0994
CR17438	FBgn0030116	0.190766	0.159071	0.06483	0.138222	0.0378196
Lcp65Ag2	FBgn0020637	1.3266	1.17195	1.45501	1.31785	0.0818293
Lcp65Ag1	FBgn0020638	0	0.276444	0.108098	0.128181	0.0804318
Lcp65Af	FBgn0020639	0	0	0	0	0
Lcp65Ae	FBgn0020640	0	0	0	0	0
Cpr65Av	FBgn0052405	0	0.106299	0.257364	0.121221	0.0746683
Cpr65Aw	FBgn0052404	0	0	0	0	0
Lcp65Ad	FBgn0020641	0	0.123103	0	0.0410343	0.0410343
Lcp65Ac	FBgn0020642	0	0	0	0	0
Lcp65Ab2	FBgn0020643	0	0	0	0	0
Cpr65Ax1	FBgn0086900	0	0	0	0	0
CG3703	FBgn0040348	4.9992	4.71945	4.69663	4.80509	0.0972766
ric8b	FBgn0030117	0	0	0	0	0
Lcp65APsi	FBgn0020646	0	0	0	0	0
Lcp65Ab1	FBgn0020644	0	0	0	0	0
Cpr65Ax2	FBgn0042118	0	0	0	0	0
Lcp65Aa	FBgn0020645	0	0	0	0	0
Acp65Aa	FBgn0020765	0	0	0	0	0
CR45421	FBgn0266970	0	0	0	0	0
CG13297	FBgn0035685	0	0	0	0	0
Cpr65Ay	FBgn0085300	0	0	0	0	0
Cpr65Az	FBgn0035686	0	0.0839037	0	0.0279679	0.0279679
CR45744	FBgn0267308	0.193177	0	0	0.0643923	0.0643923
Erk7	FBgn0052703	0.58248	0.559481	0.72822	0.623394	0.052832
CG13296	FBgn0035687	0.0336666	0.041732	0.0344334	0.0366107	0.00257022
CG10289	FBgn0035688	4.56844	4.25407	4.39658	4.40636	0.0908825
CG7376	FBgn0035689	1.12851	1.09614	1.18914	1.13793	0.0272568
CG10274	FBgn0035690	3.52352	3.55263	3.21218	3.42944	0.108956
D19B	FBgn0022699	5.05224	5.32305	5.19866	5.19132	0.0782623
CG43293	FBgn0262985	0	0	0.232209	0.077403	0.077403
D19A	FBgn0022935	5.38865	5.97065	5.74286	5.70072	0.169325
CG7386	FBgn0035691	1.54371	1.36615	1.52275	1.47754	0.056021
CG13298	FBgn0035692	28.6076	29.2623	27.513	28.461	0.510274
Trn	FBgn0024921	8.71465	8.36103	8.68363	8.58644	0.113059
CG17440	FBgn0030120	0.158451	0.235108	0.193452	0.19567	0.0221567
CG8219	FBgn0035693	0.171357	0.0971669	0.127439	0.131988	0.0215373
LanA	FBgn0002526	0.645431	0.5643	0.552737	0.587489	0.0291625
CG33946	FBgn0047000	1.70662	3.04642	3.48417	2.74574	0.534705
CG13299	FBgn0035694	0	0	0	0	0
BG642312	FBgn0047334	0	0.146749	0	0.0489163	0.0489163
CG42714	FBgn0261631	0	0	0	0	0
CG10226	FBgn0035695	4.1057	5.07311	5.13541	4.77141	0.333339
Mdr65	FBgn0004513	7.07385	9.4942	10.0054	8.85782	0.904108
Best2	FBgn0035696	12.727	13.8573	13.9002	13.4948	0.384116
CG10163	FBgn0035697	0.0394037	0	0	0.0131346	0.0131346
Cfp1	FBgn0030121	3.56588	3.67651	3.15534	3.46591	0.158535
ImpL3	FBgn0001258	11.7618	11.5373	10.9009	11.4	0.257828
CR44522	FBgn0265715	0	0.372247	0.141442	0.17123	0.108486
CG43168	FBgn0262787	0	0	0.0328573	0.0109524	0.0109524
CR45420	FBgn0266969	0	0	0	0	0
CR45114	FBgn0266589	0	0	0	0	0
CR45113	FBgn0266588	0	0	0	0	0
Or65a	FBgn0041625	26.8271	30.9382	27.4632	28.4095	1.27761
Or65b	FBgn0041624	28.9742	33.6378	33.0052	31.8724	1.46056
Or65c	FBgn0041623	10.3264	11.1662	9.58282	10.3585	0.457364
CG13300	FBgn0035699	0.078645	0.0885573	0.0893293	0.0855105	0.00343999
CG16892	FBgn0030122	3.4791	3.2957	2.9429	3.23923	0.157341
Sfp65A	FBgn0259969	0	0	0	0	0
CR45419	FBgn0266968	0	0	0	0	0
CR45980	FBgn0267642	0	0	0	0	0
CG42747	FBgn0261801	0.0141905	0	0	0.00473017	0.00473017
CG10147	FBgn0035702	3.04179	2.13498	2.28223	2.48633	0.280962
CG8270	FBgn0035703	5.55441	4.96352	5.61253	5.37682	0.20733
Vps8	FBgn0035704	2.86032	2.96293	2.642	2.82175	0.0946304
sfl	FBgn0020251	2.38733	2.26679	2.30597	2.32003	0.0354999
CR45979	FBgn0267641	0	0	0	0	0
CG32396	FBgn0052396	0.0268285	0	0	0.00894283	0.00894283
snoRNA:CG16892-a	FBgn0263475	0	0	0	0	0
CG18769	FBgn0042185	4.48495	4.25373	4.3914	4.37669	0.0671513
jv	FBgn0263973	2.11241	2.13517	2.04317	2.09692	0.0276649
ndl	FBgn0002926	0.00464834	0	0	0.00154945	0.00154945
CG8368	FBgn0286051	3.85152	4.65193	4.14192	4.21512	0.23394
zpg	FBgn0024177	0	0	0	0	0
CR45418	FBgn0266967	0.113892	0.150514	0.231384	0.165263	0.0347095
CG8398	FBgn0035708	0.850008	0.773948	0.819213	0.81439	0.0220887
GluRIA	FBgn0004619	0.0105927	0	0	0.0035309	0.0035309
CR45238	FBgn0266773	0	0	0	0	0
CR45239	FBgn0266774	0	0	0	0	0
c11.1	FBgn0040236	5.44897	4.80874	4.79336	5.01702	0.216019
eIF4E-4	FBgn0035709	0	0	0	0	0
CR45173	FBgn0266683	0	0	0	0	0
CG32395	FBgn0041232	0	0	0	0	0
SP1173	FBgn0035710	22.5455	22.2681	21.6416	22.1517	0.267342
CG8519	FBgn0035711	2.96956	0.519527	2.21189	1.90033	0.724217
ple	FBgn0005626	28.7084	24.3634	21.7062	24.926	2.04084
CR44523	FBgn0265716	0	0.241914	0.178841	0.140252	0.072451
CR45417	FBgn0266966	0.114111	0.144263	0.231188	0.163187	0.0350968
dikar	FBgn0261934	2.10428	2.0123	2.06668	2.06109	0.0266992
velo	FBgn0035713	22.1037	20.2937	21.1543	21.1839	0.522712
lz	FBgn0002576	0.125096	0.154839	0.241128	0.173688	0.0347961
CG8549	FBgn0035714	11.222	10.6551	10.324	10.7337	0.262192
CG10103	FBgn0035715	29.7634	28.8069	29.2484	29.2729	0.276389
CG32392	FBgn0052392	57.0261	56.8491	59.5879	57.821	0.88491
CR45759	FBgn0267323	0	0	0	0	0
vvl	FBgn0086680	2.7499	2.39233	2.43147	2.52457	0.113232
CR45115	FBgn0266590	2.78863	2.12921	2.14656	2.3548	0.216973
CR45416	FBgn0266965	0	0	0	0	0
Prat2	FBgn0041194	0.372	1.7942	0.0951791	0.753793	0.526306
CG45413	FBgn0266962	0	0	0	0	0
CG14820	FBgn0035718	0	0	0	0	0
CR44534	FBgn0265727	0	0	0	0	0
CR45415	FBgn0266964	0	0	0	0	0
CR45414	FBgn0266963	0	0	0	0	0
CR45412	FBgn0266961	0	0	0	0	0
tow	FBgn0035719	4.03098	3.61563	3.86024	3.83562	0.120532
CG10077	FBgn0035720	179.392	121.945	161.668	154.335	16.984
CG9948	FBgn0035721	6.24114	5.9944	6.10736	6.1143	0.0713122
CG10075	FBgn0035722	19.4525	18.2904	18.5683	18.7704	0.350358
Surf1	FBgn0029117	15.6149	17.4711	15.9712	16.3524	0.568728
sgl	FBgn0261445	9.33955	8.46796	8.45189	8.75313	0.293245
CG10064	FBgn0035724	0.593916	0.613686	0.647913	0.618505	0.0157727
c12.1	FBgn0040235	13.4842	15.1065	15.0884	14.5597	0.537775
Mis12	FBgn0035725	8.34637	9.5505	9.34924	9.08204	0.372393
CG9953	FBgn0035726	24.7946	29.7726	28.5018	27.6897	1.4933
CG10063	FBgn0035727	0.0630728	0	0.259027	0.107367	0.0779855
Galphai	FBgn0001104	15.665	15.8746	16.1844	15.908	0.150865
CR32385	FBgn0047205	0.108081	0.0591065	0.0473835	0.0715237	0.0185893
CR46000	FBgn0267662	0	0	0	0	0
CG43439	FBgn0263387	0.0430255	0	0	0.0143418	0.0143418
bin	FBgn0045759	0	0	0	0	0
Mp	FBgn0260660	1.71784	1.35586	1.36727	1.48032	0.118804
CG3699	FBgn0040349	0.193189	0.877117	0.066159	0.378822	0.251832
c12.2	FBgn0040234	7.05288	7.25547	6.76704	7.02513	0.141679
CG17744	FBgn0035730	0	0	0	0	0
CR45832	FBgn0267482	0	0	0	0	0
CG8641	FBgn0035733	5.57092	5.34866	5.35958	5.42639	0.0723354
CG14823	FBgn0035734	0.203089	0.438654	0.0487392	0.230161	0.11337
CG32391	FBgn0052391	0	0	0	0	0
CG34030	FBgn0054030	0	0	0	0	0
Cpr65Ea	FBgn0035735	0.320824	0.55326	0.108706	0.327597	0.128376
Cpr65Eb	FBgn0035736	0	0	0	0	0
Cpr65Ec	FBgn0035737	0	0	0.109006	0.0363353	0.0363353
form3	FBgn0053556	8.67173	7.42233	7.27392	7.78933	0.443277
CG34449	FBgn0085478	3.32155	2.91041	2.86762	3.03319	0.144707
msl-3	FBgn0002775	4.72307	4.16908	5.04988	4.64734	0.257069
BBS1	FBgn0035741	4.82669	4.62041	4.39701	4.6147	0.124071
CG8629	FBgn0035742	4.71778	3.36596	6.79949	4.96108	0.998612
CG15829	FBgn0035743	6.06276	5.12985	6.09231	5.76164	0.31601
CG8628	FBgn0250836	1.04236	0.77273	1.21865	1.01125	0.129663
Dbi	FBgn0010387	375.241	388.924	400.445	388.203	7.28469
melt	FBgn0023001	1.1283	1.19207	1.41205	1.24414	0.0859496
corn	FBgn0259173	4.9157	4.34878	4.32611	4.5302	0.192863
CG8620	FBgn0040837	0.50006	0.54222	0.809898	0.617393	0.0970191
Dscam2	FBgn0265296	0.857626	0.455473	0.728006	0.680368	0.11851
CG34450	FBgn0085479	0.0641615	0.0398861	0.0986353	0.067561	0.0170444
CR45410	FBgn0266959	0	0	0	0	0
CG14826	FBgn0035750	0	0	0.0562233	0.0187411	0.0187411
CG14829	FBgn0035751	0	0	0	0	0
BHD	FBgn0261111	4.3878	4.72807	4.84662	4.65416	0.137508
RpL18	FBgn0035753	587.705	608.887	584.119	593.57	7.72798
Neos	FBgn0024542	7.29321	7.19945	6.49908	6.99725	0.25055
mRpL50	FBgn0028648	14.414	14.1009	13.8795	14.1315	0.155052
mei-P22	FBgn0016036	0.0941398	0	0.096362	0.0635006	0.0317568
Cdc27	FBgn0012058	6.05953	5.84667	6.35549	6.08723	0.147535
MED4	FBgn0035754	7.95959	8.53805	9.1453	8.54765	0.342319
BCL7-like	FBgn0026149	4.30718	3.98925	4.57011	4.28885	0.16793
CR43470	FBgn0263447	22.0321	17.1464	14.0742	17.7509	2.31705
CG14830	FBgn0035755	36.6747	33.8664	25.3482	31.9631	3.40535
unc-13-4A	FBgn0035756	0.787148	0.749111	0.695331	0.743863	0.0266348
CG8607	FBgn0035760	4.99693	4.96729	5.00861	4.99094	0.0122979
RhoGEF4	FBgn0035761	0.301423	0.220892	0.308585	0.276967	0.0281135
Rint1	FBgn0035762	7.262	7.65239	7.64957	7.52132	0.129663
CG8602	FBgn0035763	28.0495	32.612	30.7731	30.4782	1.32531
CG42307	FBgn0259203	34.1615	43.8821	40.9975	39.6804	2.88234
mus312	FBgn0002909	0.000106892	0.000100917	9.91848e-05	0.000102331	2.33455e-06
CG43781	FBgn0264303	21.5706	21.4594	23.6547	22.2282	0.713955
mgl	FBgn0261260	7.60254	6.61851	6.90892	7.04332	0.291906
eco	FBgn0035766	3.31371	3.08828	3.39254	3.26484	0.0911674
lark	FBgn0011640	35.893	37.0267	34.7501	35.8899	0.6572
CG8596	FBgn0035767	15.506	17.1976	16.0646	16.2561	0.497618
CG14834	FBgn0035768	0.20591	0.423101	0.59935	0.409454	0.113781
Srp19	FBgn0015298	34.9539	40.7221	34.3184	36.6648	2.03693
qm	FBgn0019662	9.46405	9.01376	9.77382	9.41721	0.220657
CR45833	FBgn0267483	0.446106	0	0.22795	0.224685	0.12879
CTCF	FBgn0035769	5.88393	4.72669	4.67132	5.09398	0.395298
CR45822	FBgn0267472	2.94665	3.37935	2.72025	3.01542	0.193348
CG44815	FBgn0266050	0	0	0	0	0
pst	FBgn0035770	38.643	42.2256	44.3404	41.7363	1.66279
Sec63	FBgn0035771	23.2359	23.5726	23.2916	23.3667	0.104198
CR45835	FBgn0267485	22.863	23.0825	22.4071	22.7842	0.198912
Sh3beta	FBgn0035772	30.8335	32.8927	30.814	31.5134	0.689673
akirin	FBgn0082598	27.2229	28.3967	28.0199	27.8798	0.346008
SMSr	FBgn0052380	5.28296	4.80706	4.73491	4.94164	0.171925
smid	FBgn0016983	12.7922	14.5127	13.7362	13.6804	0.49745
CG8564	FBgn0035776	0.0257283	0.0840872	0.0788268	0.0628808	0.0186382
CG8563	FBgn0035777	0.0257225	0	0.0526624	0.0261283	0.0152037
CG32379	FBgn0052379	0	0	0	0	0
CG32700	FBgn0267253	0.149548	0.121782	0.0970709	0.1228	0.0151574
CG8562	FBgn0035779	0.334144	0	0	0.111381	0.111381
CG18417	FBgn0035780	0.12862	0.0403704	0	0.0563301	0.0379772
CG8560	FBgn0035781	1.77358	0.0478895	0.0794584	0.633643	0.570042
pncr015:3L	FBgn0063083	4.97563	6.73127	6.00957	5.90549	0.509474
CR44525	FBgn0265718	0.965846	0.729964	1.11416	0.936657	0.111864
CG42458	FBgn0259935	1.4701	1.27539	1.33616	1.36055	0.0575157
Rac2	FBgn0014011	21.1992	21.3209	18.9168	20.479	0.781873
CG14835	FBgn0035782	0	0	0	0	0
sphinx1	FBgn0052383	0	0	0	0	0
sphinx2	FBgn0052382	0	0	0	0	0
CG34028	FBgn0054028	2.66988	0.240689	0	0.97019	0.852681
CG33278	FBgn0053278	0	0.0390801	0.0316199	0.0235667	0.0119785
ppk26	FBgn0035785	2.04648	2.10938	1.8258	1.99389	0.0859825
Tsp66A	FBgn0035786	0	0	0.0186581	0.00621937	0.00621937
CG42661	FBgn0261537	0	0	0.000331775	0.000110592	0.000110592
CG8543	FBgn0035787	0	0	0	0	0
CG8541	FBgn0035788	0	0	0	0	0
CG43292	FBgn0262984	0	0	0	0	0
mthl6	FBgn0035789	0	0	0	0	0
Cyp316a1	FBgn0035790	0.120934	0.0772285	0.154367	0.11751	0.0223337
CG34026	FBgn0054026	1.11542	0	0	0.371807	0.371807
Cyp4d8	FBgn0015033	28.4831	40.3814	39.1141	35.9929	3.77266
CG8539	FBgn0035791	23.6948	25.9078	23.8583	24.487	0.711983
CG7548	FBgn0035792	0.690447	0.431796	0.703013	0.608419	0.0883858
CR45896	FBgn0267556	4.83499	5.87931	5.00935	5.24122	0.322993
CG7546	FBgn0035793	15.3466	14.5662	15.2799	15.0642	0.24976
ltl	FBgn0268063	17.6202	20.4414	21.7039	19.9218	1.20715
lqf	FBgn0028582	27.6088	28.4949	28.0675	28.0571	0.255848
CG16998	FBgn0035795	2.37019	1.12947	2.13691	1.87886	0.380697
CG32374	FBgn0052374	0	0	0	0	0
CG32376	FBgn0052376	0	0	0.0534489	0.0178163	0.0178163
l(1)G0320	FBgn0028327	24.8075	26.2862	24.4096	25.1678	0.570891
CG14837	FBgn0035797	3.38717	1.87808	3.0121	2.75912	0.453629
frac	FBgn0035798	0.213215	0.105057	0.114367	0.144213	0.0346055
CG14838	FBgn0035799	0.147213	0.183899	0.150497	0.160536	0.0117197
CG7716	FBgn0035800	0.0175963	0.0669184	0.0180682	0.0341943	0.0163626
Pura	FBgn0035802	38.9194	37.579	37.225	37.9078	0.51602
CR45866	FBgn0267526	0	0	0	0	0
snoRNA:Me18S-A1806	FBgn0086074	0	0	0	0	0
Urm1	FBgn0053276	11.0189	10.9677	9.43098	10.4725	0.520983
CG7506	FBgn0035805	20.0491	21.1431	18.793	19.9951	0.678953
CG32373	FBgn0052373	1.9505	1.84229	1.59855	1.79711	0.10408
CG3690	FBgn0040350	0	0	0	0	0
RpS28b	FBgn0030136	835.657	858.723	823.553	839.311	10.3158
PGRP-SD	FBgn0035806	13.3006	22.7359	28.8027	21.6131	4.51015
CG7492	FBgn0035807	13.671	14.6511	13.9451	14.0891	0.291944
Ank2	FBgn0261788	11.8147	8.37472	8.8918	9.69374	1.07093
CG44195	FBgn0265084	2.71531	1.15577	1.50925	1.79344	0.472093
CG12262	FBgn0035811	77.7428	84.8574	85.8655	82.8219	2.55617
CG7457	FBgn0035812	13.8373	15.2303	15.0773	14.715	0.44105
CG8492	FBgn0035813	0.197374	0.295047	0.346965	0.279795	0.0438514
Snmp2	FBgn0035815	12.5606	10.5409	11.3128	11.4714	0.588408
CG13685	FBgn0035816	7.10716	6.91154	7.15614	7.05828	0.07472
CG7409	FBgn0035817	766.03	578.893	555.501	633.475	66.6208
CG15317	FBgn0030137	3.0204	3.35209	2.60311	2.99187	0.216682
Hn	FBgn0001208	27.5032	27.1461	25.9466	26.8653	0.470775
Clk	FBgn0023076	6.24402	5.32915	3.29993	4.9577	0.869942
CG32371	FBgn0052371	0	0.0524433	0	0.0174811	0.0174811
CG32369	FBgn0052369	3.6681	3.20688	2.28168	3.05222	0.407627
Pdp1	FBgn0016694	34.4843	34.6633	56.9396	42.0291	7.45545
CG32365	FBgn0052365	3.46761	2.9986	3.34583	3.27068	0.140509
eIF4E-5	FBgn0035823	0.0451891	0	0	0.015063	0.015063
pbl	FBgn0003041	1.76743	1.57001	1.81391	1.71712	0.0747671
CG8281	FBgn0035824	8.73634	7.76315	7.81433	8.10461	0.316212
CG8111	FBgn0035825	12.4777	13.5397	12.7825	12.9333	0.315709
CR42767	FBgn0261835	0	0	0	0	0
CG32368	FBgn0052368	38.8724	51.857	60.3083	50.3459	6.23397
syd	FBgn0024187	10.4287	10.0531	10.3626	10.2815	0.115767
Srp9	FBgn0035827	17.8123	19.403	20.3425	19.1859	0.738425
CG43880	FBgn0264472	0	0	0	0	0
exex	FBgn0041156	0.0754203	0	0	0.0251401	0.0251401
RNaseX25	FBgn0010406	21.7958	22.2235	22.646	22.2218	0.245433
CG8042	FBgn0027554	16.1949	17.2023	16.6743	16.6905	0.290924
HP4	FBgn0035829	16.7916	14.9943	15.2106	15.6655	0.566502
CG8209	FBgn0035830	21.2551	23.2657	23.264	22.5949	0.669917
CG8038	FBgn0035831	5.94252	6.1957	6.38194	6.17339	0.127339
Cubn	FBgn0052702	0.684906	0.421961	0.540472	0.549113	0.0760285
nmo	FBgn0011817	3.2701	3.05199	3.59543	3.30584	0.157892
tRNA:Ala-AGC-2-1	FBgn0052370	0	0	0	0	0
bip1	FBgn0026263	1.68447	1.19554	1.29509	1.3917	0.149179
CR45867	FBgn0267527	0.546946	0.235579	0.741028	0.507851	0.147214
CR45868	FBgn0267528	0	0	0.0898752	0.0299584	0.0299584
tRNA:Leu-CAG-1-2	FBgn0052358	0	0	0	0	0
tRNA:Leu-CAG-1-3	FBgn0052359	0	0	0	0	0
tRNA:Leu-CAG-1-4	FBgn0052360	0	0	0	0	0
Ect4	FBgn0262579	40.4516	30.9772	32.1532	34.5273	2.98152
tRNA:Leu-CAG-1-5	FBgn0052361	0	0	0	0	0
LPCAT	FBgn0052699	5.73135	5.07266	5.53183	5.44528	0.19501
tRNA:Leu-CAG-1-6	FBgn0052362	0	0	0	0	0
tRNA:Leu-CAG-1-7	FBgn0052363	0	0	0	0	0
CG42590	FBgn0260967	0	0	0	0	0
CG42591	FBgn0260968	0.126351	0	0	0.042117	0.042117
CR43974	FBgn0264705	0.0538619	0	0	0.017954	0.017954
CG7565	FBgn0035833	7.2326	7.55437	7.89372	7.56023	0.190871
fan	FBgn0028379	0.0524155	0	0.0529658	0.0351271	0.0175643
CG7927	FBgn0027549	12.1767	12.4239	12.2753	12.292	0.0718454
mir-2501	FBgn0262442	0	0	0	0	0
Arp3	FBgn0262716	10.8169	11.3574	11.8087	11.3277	0.286694
CG42395	FBgn0259741	0.073468	0	0.0757843	0.0497508	0.0248844
msk	FBgn0026252	11.0195	11.4015	11.0431	11.1547	0.123588
ldbr	FBgn0035838	1.61167	1.0895	1.16425	1.28847	0.163033
CG7550	FBgn0035839	7.94047	8.11742	7.89604	7.98464	0.0676159
mRpL36	FBgn0042112	25.9097	22.7048	22.8621	23.8255	1.04307
Uba2	FBgn0029113	11.7606	11.3681	11.6218	11.5835	0.114912
CdsA	FBgn0010350	38.0925	42.5261	42.6891	41.1026	1.50577
CG7504	FBgn0035842	1.73975	1.53227	1.534	1.60201	0.0688735
mus301	FBgn0002899	0.147763	0.108865	0.139191	0.13194	0.0117997
CG13676	FBgn0035844	0.0670451	0.125336	0.0796049	0.090662	0.0177121
CG42445	FBgn0259916	8.41614	10.1956	10.1831	9.59828	0.591081
CR45540	FBgn0267100	0	0	0	0	0
CG43886	FBgn0264478	0	0	0	0	0
CG13675	FBgn0035845	0.0255219	0.0647325	0.025816	0.0386901	0.0130215
RecQ4	FBgn0040290	0.0234392	0.058519	0.0479889	0.0433157	0.0103927
Nmt	FBgn0020392	11.7936	10.0811	11.3949	11.0899	0.517348
mthl7	FBgn0035847	0.203006	0.17093	0.104293	0.15941	0.0290723
CG7979	FBgn0035848	10.1331	11.4997	11.2988	10.9772	0.426016
ERR	FBgn0035849	19.965	17.6871	18.1489	18.6003	0.695234
CR45869	FBgn0267529	26.8754	26.2008	24.3893	25.8218	0.742268
CR45870	FBgn0267530	11.4489	11.4186	11.5105	11.4593	0.0270373
Atg18a	FBgn0035850	18.1526	16.9653	17.0861	17.4013	0.377249
CR45541	FBgn0267101	0.132811	0	0	0.0442703	0.0442703
MED24	FBgn0035851	10.9601	10.7456	11.5218	11.0758	0.231421
CG7387	FBgn0035852	0.0293152	0.0365629	0.0299432	0.0319404	0.00231833
UbcE2M	FBgn0035853	24.6843	26.3849	26.0886	25.7193	0.524505
CG8005	FBgn0035854	3.24625	3.22266	3.22287	3.23059	0.00782857
CG7366	FBgn0035855	0.131044	0.0412632	0.0673021	0.0798698	0.0266684
CG13679	FBgn0035856	0.319508	0	0.493774	0.271094	0.144581
tut	FBgn0052364	1.01193	0.862721	1.13984	1.00483	0.0800761
CG8006	FBgn0035857	0.0261134	0.0328631	0.0268758	0.0286174	0.00213421
CG8012	FBgn0040832	20.7358	15.2489	13.9803	16.655	2.073
CG13674	FBgn0035858	0	0.166107	0.310958	0.159022	0.0898357
Hex-A	FBgn0001186	41.316	43.6066	42.1908	42.3711	0.667359
CG13678	FBgn0035859	0	0	0.142099	0.0473663	0.0473663
eIF4E-3	FBgn0265089	0	0	0	0	0
CR43953	FBgn0264604	0	0	0	0	0
CG7213	FBgn0035861	0.165597	0.175074	0.197168	0.17928	0.00935321
Dscam4	FBgn0263219	0.444115	0.331901	0.413885	0.396634	0.0335221
cert	FBgn0027569	19.2729	20.2192	19.9849	19.8257	0.284539
CG7201	FBgn0035865	0.587223	0.862859	0.731756	0.727279	0.0796007
Rab19	FBgn0015793	15.4366	15.6646	14.9716	15.3576	0.203914
Arl5	FBgn0035866	10.1807	9.63803	9.80897	9.8759	0.16019
CG13671	FBgn0035867	5.51719	4.66411	5.53826	5.23985	0.287936
CR45542	FBgn0267102	0.109227	0.282441	0	0.130556	0.0822282
CG7194	FBgn0035868	1.24774	1.10857	1.03438	1.13023	0.0625366
Sbp2	FBgn0087039	9.01643	9.8432	7.51931	8.79298	0.680089
Gr66a	FBgn0035870	0.725106	0.276784	1.13053	0.710807	0.246559
BI-1	FBgn0035871	159.389	182.942	177.335	173.222	7.10337
CR45409	FBgn0266958	6.45168	4.53479	4.36667	5.11771	0.668747
CG7185	FBgn0035872	15.381	15.6824	15.6687	15.5774	0.098263
CG43059	FBgn0262361	0	0	0	0	0
CG13670	FBgn0035873	0	0	0.104716	0.0349053	0.0349053
CG34461	FBgn0250833	0.521716	0.288249	0.280794	0.363586	0.0790941
CG34462	FBgn0085491	0	0	0	0	0
cin	FBgn0000316	11.9911	12.5194	12.0617	12.1907	0.165592
CR45476	FBgn0267032	0	0	0	0	0
CR45543	FBgn0267103	0	0	0.401335	0.133778	0.133778
Cpr66Cb	FBgn0035875	0.0953707	0.059683	0	0.0516846	0.0278201
Pex2	FBgn0035876	10.6495	10.7657	9.54085	10.3187	0.390361
DNApol-alpha50	FBgn0011762	0.598053	0.687207	0.497668	0.594309	0.0547472
CG7083	FBgn0035877	15.3892	14.9347	14.6181	14.9807	0.223781
CG7182	FBgn0035878	5.62059	4.87507	5.47334	5.323	0.227963
GAPcenA	FBgn0035879	16.5111	15.8124	15.9865	16.1033	0.209986
Culd	FBgn0035880	0.965917	0.812076	0.89078	0.889591	0.0444141
mir-4913	FBgn0263553	0	0	0	0	0
Idh	FBgn0001248	214.528	219.423	204.512	212.821	4.38824
ImpE1	FBgn0001253	0.0242761	0.0226642	0.0495429	0.0321611	0.00870336
Gga	FBgn0030141	8.20605	8.34398	7.93109	8.16037	0.121359
Jon66Ci	FBgn0035886	0.0652062	0	0	0.0217354	0.0217354
Jon66Cii	FBgn0035887	0	0	0	0	0
CG7120	FBgn0035888	3.90213	2.98697	3.55816	3.48242	0.266884
CG33057	FBgn0053057	0.214915	5.32067e-41	0.292162	0.169026	0.0874052
mkg-p	FBgn0035889	6.46358	7.14186	7.03016	6.87853	0.209967
CG13667	FBgn0035890	2.18313	2.57712	2.95812	2.57279	0.223731
Oseg1	FBgn0265102	10.3972	10.1512	11.1265	10.5583	0.292841
Exo70	FBgn0266667	6.61569	7.19886	7.16444	6.993	0.188915
mtrm	FBgn0010431	0.0439326	0.166694	0.180706	0.130444	0.0434445
CG32354	FBgn0052354	5.23334	5.36629	5.74396	5.44786	0.152942
Lst8	FBgn0264691	5.75666	6.02763	5.88622	5.89017	0.0782472
Cbl	FBgn0020224	6.47157	5.77381	6.29339	6.17959	0.209308
Unr	FBgn0263352	10.5027	10.3962	10.01	10.303	0.149675
CG6983	FBgn0035896	12.287	12.0745	11.9798	12.1138	0.0908283
Gug	FBgn0010825	7.14617	5.83378	6.35372	6.44456	0.381567
CG43163	FBgn0262719	1.08943	0.994044	1.04624	1.04324	0.0275764
ZC3H3	FBgn0035900	7.93387	7.47123	7.22501	7.54337	0.207785
CG6745	FBgn0035901	1.63195	2.01112	1.78483	1.8093	0.110139
CG6765	FBgn0035903	8.48975	7.44198	7.41358	7.78177	0.354085
CG6683	FBgn0035902	1.52417	1.92997	1.98102	1.81172	0.144528
GstO3	FBgn0035904	146.012	149.505	129.245	141.587	6.253
LysRS	FBgn0027084	14.0869	14.7074	14.8884	14.5609	0.242691
se	FBgn0086348	0.437273	0.545996	0.447411	0.476893	0.0346751
GstO2	FBgn0035906	58.5139	62.8947	55.1168	58.8418	2.25126
GstO1	FBgn0035907	18.0553	20.9163	20.3222	19.7646	0.871688
foi	FBgn0024236	28.7669	28.5834	29.2292	28.8598	0.19213
ergic53	FBgn0035909	12.4457	13.0801	13.1125	12.8794	0.217068
rhea	FBgn0260442	16.559	12.0528	13.9606	14.1908	1.30591
CR43910	FBgn0264511	0.360684	0	0.246799	0.202494	0.106451
mir-190	FBgn0262387	0	0	0	0	0
CG6638	FBgn0035911	5.30796	6.11818	5.0657	5.49728	0.31823
CG43078	FBgn0262508	21.9702	17.0818	17.8168	18.9563	1.52183
CG42797	FBgn0261931	2.91295	2.91079	2.67538	2.83304	0.0788325
Nelf-E	FBgn0017430	7.76629	7.80731	8.51518	8.02959	0.243082
RpL14	FBgn0017579	654.535	678.522	652.794	661.95	8.30106
snoRNA:U49:66Da	FBgn0060292	0	0	0	0	0
snoRNA:U49:66Db	FBgn0060291	0	0	0	0	0
CG5989	FBgn0017429	14.0901	13.1408	12.1741	13.135	0.553109
CG6282	FBgn0035914	22.501	20.5905	21.2244	21.4386	0.56182
S-Lap1	FBgn0035915	0.734438	0.341616	0.496867	0.524307	0.114225
S-Lap2	FBgn0052351	0	0	0.0228432	0.0076144	0.0076144
GAPsec	FBgn0035916	4.51468	5.13884	5.00848	4.88733	0.190089
Zasp66	FBgn0035917	129.86	36.4212	53.5773	73.2862	28.7172
Ptpmeg2	FBgn0028341	15.2624	15.2008	14.5154	14.9929	0.239395
Cdc6	FBgn0035918	0.0814744	0.14138	0.0500107	0.090955	0.0267986
Cpr66D	FBgn0052029	1.2299	0.554006	0.916956	0.900287	0.195292
CG13305	FBgn0035921	0	0	0	0	0
Pex7	FBgn0035922	0	0	0	0	0
Arr2	FBgn0000121	0.0284719	0	0.0290903	0.0191874	0.00959536
h	FBgn0001168	32.4516	32.087	34.6484	33.0623	0.799987
CR44526	FBgn0265719	0.487285	0.776104	0.126035	0.463141	0.188047
SrpRbeta	FBgn0011509	12.8078	13.3857	12.7067	12.9667	0.211507
CG32022	FBgn0052022	10.5128	10.6086	10.1522	10.4245	0.138947
CG6511	FBgn0035923	1.92601	1.74392	1.875	1.84831	0.0542324
CG3106	FBgn0030148	0	0	0.0394347	0.0131449	0.0131449
CG43965	FBgn0264696	4.3014	2.99972	2.12185	3.14099	0.633134
Cp18	FBgn0000357	0.793686	0.374271	0.609873	0.59261	0.121382
Cp15	FBgn0000355	0	0	0	0	0
Cp19	FBgn0000358	0.0880395	0	0	0.0293465	0.0293465
Cp16	FBgn0000356	0	0	0	0	0
Prm	FBgn0003149	30.9101	9.60316	9.35123	16.6215	7.14467
CG13306	FBgn0040828	1.02474	0.324298	0.522252	0.623763	0.208473
CR44527	FBgn0265720	0	0	0	0	0
Fhos	FBgn0266084	13.4319	9.77947	9.63603	10.9491	1.24207
CG6576	FBgn0035924	0	0	0	0	0
nej	FBgn0261617	2.71226	2.24725	2.39192	2.45048	0.137393
CG5804	FBgn0035926	0.406756	0	0	0.135585	0.135585
CG13310	FBgn0035928	0	0.0436959	0	0.0145653	0.0145653
CG13311	FBgn0035929	0	0	0	0	0
CG34426	FBgn0085455	0	0	0	0	0
CG32023	FBgn0052023	0	0	0	0	0
CG34427	FBgn0085456	0	0	0	0	0
CG13312	FBgn0035931	0	0	0	0	0
CG32024	FBgn0052024	0	0	0	0	0
CG13308	FBgn0035932	0	0	0	0	0
CG13309	FBgn0035933	0	0.165989	0	0.0553297	0.0553297
CR42657	FBgn0261522	0.115044	0.074343	0.176461	0.121949	0.0296804
dally	FBgn0263930	7.00776	6.95007	7.2105	7.05611	0.078971
CG32026	FBgn0052026	0	0	0	0	0
CR45823	FBgn0267473	0	0	0	0	0
CG43169	FBgn0262788	0	0	0	0	0
CR45871	FBgn0267531	0.405251	0.211986	0.395573	0.337603	0.0628708
Mcm7	FBgn0020633	0.618375	0.569217	0.723288	0.63696	0.0454368
TrpA1	FBgn0035934	0.426159	0.251365	0.33431	0.337278	0.0504805
tRNA:Thr-AGT-3-1Psi	FBgn0052034	0	0	0	0	0
mfr	FBgn0266757	0.0073762	0.038016	0.0311197	0.025504	0.00927994
Tsp66E	FBgn0035936	22.8137	25.2194	26.4208	24.818	1.06045
CR44016	FBgn0264786	0	0	0	0	0
CR43970	FBgn0264701	0	0	0	0	0
CG43783	FBgn0264305	2.32589	2.12513	2.04122	2.16408	0.0844533
orb2	FBgn0264307	17.541	17.0645	18.102	17.5692	0.299831
GNBP3	FBgn0040321	13.9999	12.6367	14.5192	13.7186	0.561337
mRpL12	FBgn0011787	33.8134	39.7344	37.9607	37.1695	1.75443
CG13313	FBgn0035941	0.495531	0.527901	0.435383	0.486272	0.0271059
ValRS-m	FBgn0035942	1.63325	1.728	2.14746	1.83624	0.157997
CG5653	FBgn0035943	0	0	0	0	0
CG5021	FBgn0035944	26.5144	27.7978	26.3998	26.904	0.448123
CG5026	FBgn0035945	5.8118	5.68036	5.57899	5.69038	0.0673931
CG18823	FBgn0042146	0	0	0	0	0
btd	FBgn0000233	3.12567	2.58245	3.07362	2.92725	0.173052
pix	FBgn0086706	49.35	51.4899	47.4647	49.4349	1.16275
Srp68	FBgn0035947	10.6306	12.2513	12.1699	11.6839	0.527191
CG5644	FBgn0035948	14.6624	14.3634	15.2193	14.7484	0.250788
CG13314	FBgn0035949	2.39166	2.75455	3.54697	2.89773	0.341106
Galk	FBgn0263199	21.814	21.4589	23.3962	22.223	0.595473
CG5068	FBgn0035951	12.8923	12.5271	11.6394	12.3529	0.372017
CG5280	FBgn0035952	1.63864	0.983992	1.7837	1.46878	0.245983
smg	FBgn0016070	4.65228	3.91811	4.25663	4.27567	0.21215
CG5087	FBgn0035953	5.66604	5.12274	5.30284	5.36387	0.159779
Doc3	FBgn0035954	0.0567981	0.280359	0.145442	0.160866	0.0649956
CR43498	FBgn0263509	1.85224	0.868639	2.39268	1.70452	0.44611
CG5194	FBgn0035955	0	0	0	0	0
Doc2	FBgn0035956	0.022712	0.0847617	0.0464551	0.0513096	0.0180759
Doc1	FBgn0028789	0.298518	0.370851	0.495222	0.388197	0.0574421
CG5144	FBgn0035957	1.71156	1.42533	2.04134	1.72608	0.177975
Argk	FBgn0000116	909.866	821.553	735.91	822.443	50.2187
CG4911	FBgn0035959	11.2624	10.804	11.5307	11.199	0.212159
CG4942	FBgn0035960	2.40082	2.32172	2.46035	2.3943	0.0401517
teq	FBgn0023479	1.8838	2.90128	2.22697	2.33735	0.298861
CG32032	FBgn0043806	85.3596	92.0788	87.0907	88.1764	2.01419
CG13315	FBgn0040827	5.96302	13.4331	1.41672	6.93761	3.50289
Sp1	FBgn0020378	71.9169	64.7979	71.1628	69.2925	2.25784
bol	FBgn0011206	5.53066	4.085	3.94723	4.52096	0.506412
Dhpr	FBgn0035964	29.795	34.418	33.9576	32.7235	1.47029
Use1	FBgn0035965	9.45697	7.40174	8.13943	8.33271	0.601113
nwk	FBgn0263456	16.3291	14.6722	16.4081	15.8031	0.565926
mir-4940	FBgn0263556	0	0	0	0	0
Rdl	FBgn0004244	5.56866	3.58849	4.04891	4.40202	0.598271
Slc45-1	FBgn0035968	4.8197	3.81339	4.61994	4.41768	0.307597
CG4476	FBgn0035969	0	0.0265719	0.0440027	0.0235249	0.0127935
CR45408	FBgn0266957	0	0	0	0	0
CG4483	FBgn0035970	0	0	0	0	0
CG1354	FBgn0030151	27.7591	31.1314	29.389	29.4265	0.97368
CG4477	FBgn0035971	0	0	0	0	0
GluRIB	FBgn0264000	0.053047	0.0273944	0.0108711	0.0304375	0.0122698
PGRP-LA	FBgn0035975	12.2005	15.4799	15.4571	14.3792	1.08935
PGRP-LC	FBgn0035976	24.0975	25.747	25.0692	24.9712	0.478682
PGRP-LF	FBgn0035977	6.34633	9.11116	9.48116	8.31288	0.989061
UGP	FBgn0035978	36.2237	38.5063	35.6049	36.7783	0.882273
CG32040	FBgn0052040	9.19715	11.5349	13.5226	11.4182	1.25001
CG32039	FBgn0052039	22.2032	26.6034	24.1052	24.3039	1.27411
Pdxk	FBgn0085484	16.1403	18.4604	17.1581	17.2529	0.671432
CG34456	FBgn0085485	23.7081	36.5577	40.7458	33.6705	5.12584
CG32698	FBgn0052698	0.417757	0.464498	0.355448	0.412568	0.0315868
Klp67A	FBgn0004379	0.214407	0.115666	0.215781	0.181951	0.033145
CG4447	FBgn0035980	4.19516	7.46833	6.06645	5.90998	0.948116
CG4452	FBgn0035981	14.4547	13.4547	14.1132	14.0075	0.29347
Fdx1	FBgn0011769	9.83209	10.0605	8.37007	9.42089	0.52953
Hsp67Bc	FBgn0001229	0.337186	0.0602589	0.295228	0.230891	0.0861715
CG4456	FBgn0001228	0.0361949	1.72952e-07	0.0368524	0.0243492	0.012176
Hsp22	FBgn0001223	8.99576	6.85428	6.15855	7.3362	0.853741
CG4461	FBgn0035982	56.9402	12.7011	23.3234	30.9882	13.3334
Hsp26	FBgn0001225	5.1298	2.14766	3.60154	3.62633	0.860959
Hsp67Ba	FBgn0001227	0.50785	0.570256	0.396486	0.491531	0.0508224
Ser7	FBgn0019929	15.7299	16.5092	16.4366	16.2252	0.248552
CR43481	FBgn0263492	0.28002	0.136329	0.143399	0.186583	0.0467632
Hsp23	FBgn0001224	3.76564	2.74442	3.16218	3.22408	0.296421
Hsp27	FBgn0001226	1.9239	1.61944	1.92868	1.82401	0.102293
CR43483	FBgn0263494	0	0	0	0	0
CR43482	FBgn0263493	0	0	0	0	0
CG4080	FBgn0035983	6.45581	6.59888	7.46616	6.84028	0.315652
eIF-4E	FBgn0015218	129.15	143.299	131.547	134.665	4.37194
Cpr67B	FBgn0035985	260.099	265.15	241.113	255.454	7.31725
CG4022	FBgn0035986	1.26815	1.1906	1.71537	1.39137	0.163538
CG3689	FBgn0035987	26.955	24.2224	26.8285	26.002	0.890532
CG45060	FBgn0266430	0.117484	0	0	0.0391613	0.0391613
CG3967	FBgn0035989	32.3777	29.1556	30.7217	30.7517	0.930261
CG3982	FBgn0035988	0.295501	0.443141	0.333815	0.357486	0.0442328
aay	FBgn0023129	121.039	143.257	116.459	126.918	8.27563
Shc	FBgn0015296	10.0186	10.6516	10.6492	10.4398	0.210601
RpS17	FBgn0005533	765.126	792.54	766.716	774.794	8.88486
snoRNA:Psi28S-612	FBgn0082953	0	13.9152	2.86897	5.59472	4.24187
MTF-1	FBgn0040305	4.08113	3.20696	3.6333	3.64046	0.252377
CG42526	FBgn0260431	1.15665	1.51708	1.52203	1.39859	0.120977
Bet3	FBgn0260859	16.9224	16.738	14.813	16.1578	0.674504
CR45872	FBgn0267532	6.7403	5.61369	4.732	5.69533	0.581182
CG45061	FBgn0266431	0.708208	0	0	0.236069	0.236069
Nf-YA	FBgn0035993	5.63943	5.78962	5.43417	5.62107	0.103019
CG33926	FBgn0053926	2.98	3.32257	2.47441	2.92566	0.246346
CG3529	FBgn0035995	20.3687	21.1674	21.4545	20.9969	0.324834
CG3448	FBgn0035996	4.86095	2.57943	3.30949	3.58329	0.672696
ghi	FBgn0266124	113.036	119.717	114.605	115.786	2.01701
phol	FBgn0035997	5.81687	5.96659	5.82152	5.86833	0.04915
CG3552	FBgn0035999	23.2673	19.9539	22.8864	22.0359	1.04677
CR45873	FBgn0267533	12.0586	10.9168	12.3937	11.7897	0.447042
CG3437	FBgn0035998	13.9094	11.9107	13.3129	13.0443	0.592395
CG3434	FBgn0036000	18.628	18.5358	19.7339	18.9659	0.384921
CG32695	FBgn0052695	2.081	2.60853	0.873633	1.85439	0.513479
CG44838	FBgn0266101	11.1251	8.9403	10.6165	10.2273	0.660037
Uch-L5	FBgn0011327	8.19463	8.87714	7.30314	8.12497	0.455708
Jarid2	FBgn0036004	3.50954	3.24799	3.52031	3.42595	0.0890326
pall	FBgn0036005	9.92878	10.4091	10.4759	10.2713	0.172322
CG32036	FBgn0052036	0.551861	0.443802	0.351403	0.449022	0.0579261
CG32037	FBgn0052037	0.100011	0.0835343	0	0.0611818	0.0309584
path	FBgn0036007	159.288	172.163	164.6	165.35	3.73558
CG3408	FBgn0036008	2.08148	2.87844	2.2211	2.39367	0.245712
RpS9	FBgn0010408	593.507	644.296	598.642	612.148	16.142
CR45874	FBgn0267534	54.4046	54.4028	53.6475	54.1516	0.252067
CG15247	FBgn0030156	0.88132	0.19634	0.299826	0.459162	0.213183
snoRNA:Me28S-G3253	FBgn0086075	0	0	0	0	0
CG33703	FBgn0053703	0	0	0	0	0
CG33702	FBgn0053702	0	0	0	0	0
CR33701	FBgn0053701	0	0	0	0	0
CG33700	FBgn0053700	0	0	0	0	0
Or67a	FBgn0036009	11.8137	15.072	14.5678	13.8178	1.01258
Ir67a	FBgn0036010	0	0	0	0	0
CG42673	FBgn0261555	2.11115	1.58239	1.77138	1.82164	0.154695
CR46246	FBgn0267966	0	0.0553536	0	0.0184512	0.0184512
Tmc	FBgn0267796	0.0676042	0.0840771	0.0688642	0.0735152	0.00529348
TfIIA-S-2	FBgn0040338	0.128661	0	0	0.042887	0.042887
CG1468	FBgn0030157	0.363147	1.2061	0.210864	0.59337	0.309503
CG3222	FBgn0036014	0	0	0	0	0
CG3088	FBgn0036015	0	0	0	0	0
CG3306	FBgn0036016	0	0	0	0	0
LanB2	FBgn0267348	1.59217	1.66048	1.58106	1.61124	0.0248297
CG3335	FBgn0036018	1.86387	1.79177	2.21054	1.95539	0.12926
Or67b	FBgn0036019	8.32752	10.7618	10.086	9.72511	0.725514
CG8336	FBgn0036020	11.3902	10.8491	11.515	11.2514	0.204367
fry	FBgn0016081	11.7121	9.49496	9.16726	10.1248	0.799281
CG8329	FBgn0036022	0.061879	0	0.127074	0.0629843	0.0366873
CG18179	FBgn0036023	0.132539	0	0.0681317	0.0668902	0.0382657
CG9686	FBgn0030158	0.217858	0.185252	0.446828	0.283313	0.0822977
CG18180	FBgn0036024	3.91863	0	0	1.30621	1.30621
CNMaR	FBgn0053696	0.136835	0.156788	0.062506	0.11871	0.0286861
CG16717	FBgn0036028	13.9364	15.1404	14.9115	14.6628	0.369146
alphaTub67C	FBgn0087040	0.181159	0.112437	0.185371	0.159656	0.0236406
CG6767	FBgn0036030	49.4736	50.7215	53.6994	51.2982	1.2535
CG16719	FBgn0036029	0.0411854	0.20959	0.294136	0.181637	0.0743461
CR45804	FBgn0267454	4.25852	4.87065	3.62037	4.24985	0.360951
CR45121	FBgn0266596	0.271211	0.116965	0.366583	0.251586	0.0727235
Ubc4	FBgn0015321	20.6643	19.7035	19.6768	20.0149	0.324808
CG6761	FBgn0036031	12.7185	14.2898	13.3565	13.4549	0.456258
CG9689	FBgn0030159	3.66143	2.85732	4.88528	3.80134	0.589587
CG16711	FBgn0036032	5.22592	5.11982	5.05208	5.13261	0.0505889
SH3PX1	FBgn0040475	26.2592	25.1195	25.741	25.7066	0.329453
vsg	FBgn0045823	135.272	137.999	137.546	136.939	0.843696
snmRNA:838	FBgn0065081	0	0	0	0	0
CG18178	FBgn0036035	6.75438	6.47589	6.14585	6.45871	0.175877
CG14174	FBgn0036036	3.84532	4.35224	3.46357	3.88704	0.257384
nbs	FBgn0261530	6.12826	6.46862	6.40429	6.33372	0.104397
defl	FBgn0036038	2.74805	3.05189	2.7143	2.83808	0.107348
Naa60	FBgn0036039	7.78163	7.41148	7.647	7.61337	0.108168
ATPsynB	FBgn0019644	401.306	371.104	366.866	379.759	10.8429
CG9691	FBgn0030160	1186.93	1332.19	1332.57	1283.9	48.4835
CG6749	FBgn0036040	0.580822	0.219834	0.650281	0.483646	0.133421
mir-4986	FBgn0263541	0	0	0	0	0
CG42268	FBgn0259163	21.9075	14.8356	20.4544	19.0658	2.15631
CR44348	FBgn0265448	0	0	0.105937	0.0353123	0.0353123
CR45407	FBgn0266956	0	0	0.132995	0.0443317	0.0443317
CG8177	FBgn0036043	27.9146	24.6137	27.8874	26.8052	1.09579
CG32052	FBgn0044328	0.924854	0.975715	1.20692	1.03583	0.086796
Zasp67	FBgn0036044	0.270304	0.144136	0.368634	0.261025	0.0649729
Ilp1	FBgn0044051	0	0	0	0	0
Ilp2	FBgn0036046	0	0	0.247521	0.082507	0.082507
CG15249	FBgn0030161	0.0386714	0	0.0395413	0.0260709	0.0130379
Ilp3	FBgn0044050	0	0.0921545	0	0.0307182	0.0307182
Ilp4	FBgn0044049	0	0.0690455	0	0.0230152	0.0230152
CG43897	FBgn0264489	134.862	67.7445	80.9647	94.5237	20.527
Ilp5	FBgn0044048	0.147683	0	0.152648	0.10011	0.0500757
I-2	FBgn0028429	14.9432	14.4666	13.9144	14.4414	0.297256
Cdk8	FBgn0015618	1.86585	1.66522	1.97625	1.83577	0.0910373
RasGAP1	FBgn0004390	4.26501	3.50073	4.17383	3.97986	0.241005
CG10809	FBgn0036052	5.35008	5.75357	4.97074	5.35813	0.226019
iPLA2-VIA	FBgn0036053	18.9628	18.802	19.3682	19.0443	0.168455
CG8108	FBgn0027567	31.3996	26.3351	29.154	28.9629	1.46511
CG1986	FBgn0030162	0	0	0	0	0
CR45406	FBgn0266955	0	0.104451	0	0.034817	0.034817
CG34382	FBgn0085411	0.0741204	0.0546405	0.120685	0.0831486	0.0195925
Taf2	FBgn0011836	2.67008	2.53952	3.06941	2.75967	0.15939
CalpB	FBgn0025866	9.26376	8.73372	9.15774	9.05174	0.161929
CR45875	FBgn0267535	9.11724	8.18666	8.96318	8.75569	0.287972
CG6709	FBgn0036056	5.7439	5.29731	5.60434	5.54852	0.131906
CG14164	FBgn0036057	4.06373e-08	0.0107027	0.602077	0.20426	0.198933
CG6707	FBgn0036058	41.1035	42.3508	42.3198	41.9247	0.410698
nudE	FBgn0036059	24.9221	25.7336	24.892	25.1826	0.275654
bma	FBgn0085385	0.834256	0.6597	0.557451	0.683802	0.0808104
Idgf4	FBgn0026415	519.708	562.966	545.627	542.767	12.5691
CG6685	FBgn0036062	3.88487	3.42061	3.42761	3.5777	0.1536
Dronc	FBgn0026404	1.90747	1.66693	1.75504	1.77648	0.0702605
CG6674	FBgn0036063	10.7865	12.79	9.99945	11.192	0.830683
vnc	FBgn0263251	36.2207	34.3613	35.9507	35.5109	0.58006
CG42455	FBgn0259932	0.636107	0.775761	2.93171	1.44786	0.74302
dpr6	FBgn0040823	0.201786	0.185918	0.1478	0.178501	0.0160195
CR45876	FBgn0267536	0	0	0	0	0
CR45877	FBgn0267537	0	0	0	0	0
CR45155	FBgn0266648	0.0927427	0	0.382271	0.158338	0.115123
CR45878	FBgn0267538	0	0	0	0	0
snoRNA:Me28S-U1688	FBgn0086044	35.5215	0	0	11.8405	11.8405
CG14160	FBgn0036066	0.022766	0	0	0.00758867	0.00758867
CG32053	FBgn0052053	0.0627556	0	0	0.0209185	0.0209185
CG32054	FBgn0052054	0.0542593	0.0341072	0	0.0294555	0.0158351
CG42825	FBgn0262007	0.132604	0.166481	0.189698	0.162928	0.0165771
CG42826	FBgn0262008	0.37954	0.18889	0.624334	0.397588	0.126025
CR45879	FBgn0267539	0	0	0	0	0
dpr10	FBgn0052057	1.38673	1.27919	1.21628	1.29407	0.0497637
snoRNA:MeU2-A31	FBgn0086076	0	0	0	0	0
CG8072	FBgn0036070	0.0441433	0	0	0.0147144	0.0147144
CG6628	FBgn0036072	0	0	0	0	0
CG1791	FBgn0030163	49.1216	56.9747	48.7337	51.61	2.68469
ect	FBgn0000451	0.132549	0.183416	0.320773	0.212246	0.0562152
CR44538	FBgn0265731	0	0	0	0	0
CG8065	FBgn0036075	0.123503	0	0	0.0411677	0.0411677
CG32055	FBgn0052055	0.310022	0.297501	0.238689	0.282071	0.0219899
scramb1	FBgn0052056	23.3636	23.4463	23.8244	23.5448	0.14184
CR44542	FBgn0265735	0	0	0	0	0
CR45403	FBgn0266952	0	0	0	0	0
CR44541	FBgn0265734	15.7379	15.6765	14.5482	15.3209	0.38674
Or67c	FBgn0036078	10.4875	14.823	13.1955	12.8353	1.26444
CR44539	FBgn0265732	0	0	0	0	0
CG1889	FBgn0030164	92.0169	106.575	114.073	104.222	6.47487
CR44540	FBgn0265733	0	0	0	0	0
can	FBgn0011569	0	0.0185485	0.044736	0.0210948	0.0129768
CR45242	FBgn0266777	0	0	0	0	0
Or67d	FBgn0036080	31.783	46.9715	43.0488	40.6011	4.55214
CR46003	FBgn0267665	0.00577193	0.00246844	0	0.00274679	0.00167202
CR46004	FBgn0267666	0	0	0	0	0
mir-276b	FBgn0262381	0	0	0	0	0
CR46006	FBgn0267668	0.914568	0.952855	0.778527	0.881983	0.0528958
mir-276a	FBgn0266076	0	0	0	0	0
CR45245	FBgn0266780	0	0	0.0317396	0.0105799	0.0105799
CG14631	FBgn0029552	0	0	0.0947523	0.0315841	0.0315841
CG43386	FBgn0263216	3.76384	4.76129	3.46639	3.99717	0.391589
CR44543	FBgn0265736	0	0	0	0	0
CR43990	FBgn0264722	0	0	0	0	0
CG12362	FBgn0036082	0.0232052	0	0	0.00773507	0.00773507
Ir67b	FBgn0036083	0	0	0	0	0
Ir67c	FBgn0052058	0	0	0	0	0
Gem3	FBgn0011802	1.599	1.43985	1.5545	1.53112	0.047407
CG32061	FBgn0052061	0	0	0.0627299	0.02091	0.02091
S-Lap3	FBgn0045770	0	0	0	0	0
Rbfox1	FBgn0052062	4.40205	3.42951	3.94573	3.92576	0.280926
S-Lap4	FBgn0052064	0.0219579	0	0	0.0073193	0.0073193
CG15252	FBgn0030167	0.156644	0.0559009	0.142743	0.118429	0.0315207
CG6527	FBgn0036085	0	0	0	0	0
CR46212	FBgn0267932	0	0	0	0	0
CG42521	FBgn0260396	0	0	0	0	0
CG43127	FBgn0262592	0	0	0	0	0
CG34238	FBgn0085267	0	0	0	0	0
CG14151	FBgn0036089	0	0	0	0	0
CG42536	FBgn0260644	0	0	0	0	0
CG42535	FBgn0260643	0	0	0	0	0
CG34001	FBgn0054001	4.13334	5.31232	4.39127	4.61231	0.357837
hay	FBgn0001179	3.0035	3.11168	3.15471	3.08996	0.0449808
CG32694	FBgn0052694	53.9396	47.1429	44.0561	48.3795	2.91935
E(z)	FBgn0000629	9.40674	9.40627	10.5103	9.77444	0.367932
CG8009	FBgn0036090	18.7824	21.4666	19.2887	19.8459	0.823425
CG18628	FBgn0036091	0.480646	0.946193	0.244287	0.557042	0.206192
CG32066	FBgn0052066	10.8458	11.7685	11.6683	11.4275	0.292301
CG14154	FBgn0036093	0	0.0545058	0.250728	0.101745	0.0761353
CG14153	FBgn0036094	114.149	126.512	128.724	123.128	4.53485
CG8003	FBgn0036096	5.52281	5.37712	5.39748	5.43247	0.0455508
Adi1	FBgn0052068	47.4997	55.9314	49.0764	50.8358	2.58812
simj	FBgn0010762	4.94053	4.83255	5.03895	4.93734	0.0596038
CG11811	FBgn0036099	11.4204	11.9935	11.6599	11.6913	0.166181
CG33557	FBgn0053557	0.0669292	0	0.0683555	0.0450949	0.0225512
CG33493	FBgn0053493	6.04979	9.17867	4.75101	6.65982	1.31405
ND-13B	FBgn0047038	127.906	132.539	125.882	128.776	1.97029
NijA	FBgn0036101	17.7178	21.4113	17.6268	18.9186	1.24661
CG43245	FBgn0262890	0.0356164	0.135474	0.108946	0.0933455	0.0298631
CR44544	FBgn0265737	1.25075	1.46228	0.892885	1.20197	0.16617
CR44545	FBgn0265738	0	0	0	0	0
CR44546	FBgn0265739	0	0	0	0	0
CR46230	FBgn0267950	0	0	0	0	0
CR46231	FBgn0267951	0	0	0	0	0
CG12523	FBgn0036102	0.154938	0	0.160029	0.104989	0.0525151
CG2990	FBgn0030170	0	0.0290386	0.0237855	0.017608	0.00893366
CR44347	FBgn0265447	1.09459	1.10313	0.561329	0.919683	0.179194
CG42831	FBgn0262020	0	0	0	0	0
CR45247	FBgn0266782	0.0837017	0.324909	0	0.136204	0.0973975
CR45246	FBgn0266781	0.139041	0	0.143118	0.094053	0.0470412
CR45169	FBgn0266679	0.223539	0.104385	0.151049	0.159658	0.0346651
tna	FBgn0026160	15.5122	14.523	16.3243	15.4532	0.520828
CG6418	FBgn0036104	5.25557	4.44491	5.17356	4.95801	0.257642
Blos4	FBgn0036105	10.8062	11.3199	10.235	10.787	0.31333
CG6409	FBgn0036106	5101.48	5492.32	6443.74	5679.18	398.582
galla-2	FBgn0036107	37.7677	43.6896	45.4093	42.2889	2.31445
Cht6	FBgn0263132	0.0735222	0.0307441	0.0266209	0.0436291	0.0149939
CG6404	FBgn0027615	8.21975	7.88346	9.05045	8.38455	0.346812
Cpr67Fa1	FBgn0036108	0	0	0	0	0
Cpr67Fa2	FBgn0036109	0	0	0	0	0
CR45171	FBgn0266681	0.48169	0	0.441541	0.307744	0.154308
Cpr67Fb	FBgn0036110	0	0.51244	0.136836	0.216425	0.153188
Aps	FBgn0036111	36.0366	37.2168	37.8205	37.0246	0.523855
CR45248	FBgn0266783	0	0	0	0	0
CR45249	FBgn0266784	0	0	0	0	0
CG14147	FBgn0036112	0	0	0	0	0
CR45745	FBgn0267309	0.317496	0	0	0.105832	0.105832
CR45185	FBgn0267495	0.106151	0.0862183	0.0137088	0.0686927	0.0280877
klu	FBgn0013469	0.588194	0.491494	0.648546	0.576078	0.04574
snoRNA:Me18S-G962	FBgn0086077	0	0	0	0	0
Fad2	FBgn0029172	0.0388503	0.976394	0	0.338415	0.319187
CG32079	FBgn0052079	0	0	0	0	0
CG32081	FBgn0052081	0	0	0	0	0
CR44547	FBgn0265740	0	0	0	0	0
CG43693	FBgn0263776	82.024	85.1351	91.2174	86.1255	2.69971
CR45119	FBgn0266594	1.2002	1.39368	0.617617	1.0705	0.233228
CG7888	FBgn0036116	43.9401	51.1687	55.0285	50.0458	3.24981
CG6321	FBgn0036117	6.5772	6.54311	7.99798	7.03943	0.479376
Yp2	FBgn0005391	38.8849	11.5474	3.82712	18.0865	10.6353
Blos2	FBgn0036118	12.0116	15.9505	14.9381	14.3001	1.18097
CG32069	FBgn0052069	31.1892	36.0908	31.6238	32.9679	1.56647
CG32075	FBgn0052075	3.74021	4.35601	4.01213	4.03612	0.17817
SuUR	FBgn0025355	1.87369	2.13952	2.01578	2.00966	0.0767994
CG6310	FBgn0036121	2.86762	3.56836	3.0085	3.14816	0.214
Mocs1	FBgn0263241	62.8548	67.4104	61.237	63.8341	1.84815
Pfdn2	FBgn0010741	31.4315	34.0189	31.1816	32.2107	0.90699
CG7839	FBgn0036124	3.15332	3.0053	3.3331	3.16391	0.0947756
JIL-1	FBgn0020412	5.05155	5.50585	5.27581	5.27774	0.131149
Yp1	FBgn0004045	81.926	25.5593	8.15747	38.5476	22.2634
CG6279	FBgn0036125	0.490684	0.892417	0.925642	0.769581	0.139778
CG33947	FBgn0083068	6.20729	6.43	6.9179	6.5184	0.209843
CG6272	FBgn0036126	44.2051	43.9854	45.5055	44.5653	0.474342
APP-BP1	FBgn0261112	5.97861	6.64707	6.91381	6.51316	0.278147
Elo68beta	FBgn0036128	0.269177	0.0843695	0.414227	0.255924	0.0954519
Elo68alpha	FBgn0052072	1.85414	0.613584	2.33583	1.60118	0.513005
CG32071	FBgn0052071	0.782439	0.80123	1.1148	0.89949	0.107792
CG32073	FBgn0052073	0.197294	0.259498	0	0.152264	0.078221
CG12522	FBgn0036131	0	0	0	0	0
CG34012	FBgn0054012	0	0	0	0	0
CR45601	FBgn0267161	99.8516	30.662	10.2625	46.9254	27.1104
CG7638	FBgn0036133	10.7655	11.7215	10.2093	10.8988	0.441591
Sod1	FBgn0003462	797.722	843.966	810.489	817.392	13.7885
FoxK	FBgn0036134	14.5519	13.8399	14.677	14.3563	0.260697
mRpL2	FBgn0036135	18.1373	19.0637	17.4353	18.2121	0.471564
Ufd1-like	FBgn0036136	28.4035	30.8884	30.1101	29.8007	0.733824
NaPi-III	FBgn0260795	139.641	140.928	144.999	141.856	1.61482
nol	FBgn0014368	0.939847	0.39638	0.422722	0.586316	0.176929
CG32074	FBgn0052074	0.434501	0.747725	0.292926	0.491717	0.13437
CG14143	FBgn0036138	0	0	0	0	0
IRSp53	FBgn0052082	6.56748	5.78856	5.09923	5.81842	0.42411
su(w[a])	FBgn0003638	34.7158	21.8708	29.1495	28.5787	3.719
CG15312	FBgn0030174	30.1974	25.6628	30.7862	28.8821	1.61862
CG6216	FBgn0036139	3.6491	3.37237	3.28097	3.43415	0.110668
CR43989	FBgn0264721	2.36114	2.66057	2.0212	2.34764	0.184694
Alg10	FBgn0052076	5.81509	6.07449	6.79645	6.22868	0.293597
wls	FBgn0036141	7.46337	8.24486	8.19024	7.96616	0.251887
CG7616	FBgn0036142	4.99367	4.17393	5.18349	4.7837	0.309768
CG14142	FBgn0036143	100.759	83.8975	91.4712	92.0426	4.87587
GlcAT-P	FBgn0036144	10.9869	10.0178	10.9954	10.6667	0.324459
Plod	FBgn0036147	4.64665	3.9025	4.15391	4.23435	0.218551
CG7607	FBgn0036145	7.42079	9.98547	10.4412	9.28249	0.940099
CG14141	FBgn0036146	2.1612	3.73503	3.37631	3.09085	0.476219
Gr9a	FBgn0052693	0	0	0	0	0
Ube3a	FBgn0061469	8.52286	7.64036	7.42781	7.86368	0.335254
CG7600	FBgn0064766	7.65022	7.68852	7.10848	7.48241	0.18729
CG42671	FBgn0261553	18.9418	17.0566	17.5007	17.833	0.569013
CR46050	FBgn0267717	52.0622	44.9993	49.319	48.7935	2.05574
CR45405	FBgn0266954	0	0.432935	0	0.144312	0.144312
Ir68a	FBgn0036150	0.332012	0.12225	0.200651	0.218304	0.061193
CR44718	FBgn0265929	0.129418	0.108061	0.0442426	0.0939072	0.0255862
CR44719	FBgn0265930	0.56194	0	0	0.187313	0.187313
CR44714	FBgn0265925	0.277037	0	0	0.0923457	0.0923457
CR44713	FBgn0265924	0	0	0	0	0
CR45602	FBgn0267162	0.236569	0.309136	0.239621	0.261775	0.0236967
CR44715	FBgn0265926	0	0	0	0	0
CR44717	FBgn0265928	0.161547	0.104552	0.316699	0.194266	0.063389
CR44716	FBgn0265927	0.399981	0.258243	0.206008	0.288077	0.0579481
scyl	FBgn0041094	31.0296	28.4116	31.3651	30.2688	0.93362
CR44720	FBgn0265931	0.409525	0.105564	0.494414	0.336501	0.11804
CR45404	FBgn0266953	0	0	0	0	0
CG6175	FBgn0036152	7.58557	8.19098	8.21645	7.99767	0.206179
CG7573	FBgn0036153	0.108632	0.410244	0.187151	0.235342	0.0903406
CR44361	FBgn0265468	0	0	0	0	0
CR46240	FBgn0267960	0	0	0	0	0
ZAP3	FBgn0052685	8.3767	8.80665	7.9586	8.38065	0.244819
CG6168	FBgn0036154	0	0	0	0	0
CR44721	FBgn0265932	0	0	0	0	0
CR44722	FBgn0265933	0	0	0	0	0
CR44723	FBgn0265934	0	0	0	0	0
CR45250	FBgn0266785	0	0	0	0	0
CR45251	FBgn0266786	4.68557	10.41	6.00704	7.0342	1.73047
CG6163	FBgn0036155	1.58455	1.3093	2.0104	1.63475	0.203941
CR45036	FBgn0266396	0.194412	0.247158	0.112863	0.184811	0.0390637
CR42755	FBgn0261813	0.0435944	0	0	0.0145315	0.0145315
CG11726	FBgn0036156	0	0	0	0	0
CG2972	FBgn0030177	5.77311	6.60403	7.3353	6.57081	0.451271
CG44362	FBgn0265469	0	0	0	0	0
CR44363	FBgn0265470	0.0722447	0.0954912	0.22003	0.129255	0.0458808
CG7560	FBgn0036157	1.53772	1.74794	1.48254	1.5894	0.0808546
CG6149	FBgn0036158	0	0	0	0	0
CR44548	FBgn0265741	0	0	0	0	0
CR44549	FBgn0265742	0	0	0	0	0
CG7557	FBgn0036159	0	0	0	0	0
CG12289	FBgn0036160	0	0	0	0	0
CG7551	FBgn0036161	0.0427814	0	0	0.0142605	0.0142605
CG6140	FBgn0036162	0	0	0.0283662	0.0094554	0.0094554
CG2974	FBgn0030178	5.69855	6.28929	4.81682	5.60155	0.427823
Vha16-3	FBgn0028667	0	0	0	0	0
CR46049	FBgn0267716	0	0	0	0	0
Vha16-2	FBgn0028668	0	0	0	0	0
chrb	FBgn0036165	45.6007	46.3127	39.6925	43.8686	2.09816
CG33500	FBgn0053500	0	0	0	0	0
Sgs8	FBgn0003378	0.47845	0	0.246801	0.24175	0.13814
Sgs7	FBgn0003377	0.554934	0	0	0.184978	0.184978
CG33272	FBgn0053272	0	0	0	0	0
Sgs3	FBgn0003373	0.0373541	0.0470104	0	0.0281215	0.0143344
CG7512	FBgn0036168	0.0219643	0.0272867	0.0225025	0.0239178	0.00169158
RhoU	FBgn0083940	2.87411	2.99033	2.83218	2.89887	0.0473032
Fuca	FBgn0285958	5.61218	10.1485	8.76421	8.17496	1.34226
CG11714	FBgn0036170	3.84322e-06	0.228337	0.185871	0.138071	0.0701134
Mob2	FBgn0259481	41.8709	37.4121	38.8984	39.3938	1.31076
mir-4968	FBgn0263569	0	0	0	0	0
CG7394	FBgn0036173	42.4996	43.4721	37.0276	40.9998	2.00583
CG33267	FBgn0053267	2.15504	0.766113	1.74162	1.55426	0.411748
CG33490	FBgn0053490	0.0227681	0	0	0.00758937	0.00758937
CG33489	FBgn0053489	0	0	0	0	0
CG33271	FBgn0053271	0	0	0	0	0
CG33270	FBgn0053270	0	0	0	0	0
CR44894	FBgn0266199	1.70018	1.52716	1.4181	1.54848	0.0821243
CG43390	FBgn0263247	0	0	0	0	0
CG43391	FBgn0263248	0	0	0	0	0
CG33269	FBgn0053269	0	0	0	0	0
CG32086	FBgn0052086	0.0530636	0	0.0265324	0.026532	0.0153181
rt	FBgn0003292	1.72209	1.78451	2.02655	1.84438	0.0928486
CG7377	FBgn0036176	0	0	0	0	0
CG33268	FBgn0036177	0.213216	0	0	0.071072	0.071072
CR45672	FBgn0267232	0	0	0	0	0
CR45442	FBgn0266991	0	0	0	0	0
CR45443	FBgn0266992	0	0	0	0	0
snoRNA:Me18S-A627	FBgn0086045	0	0	0	0	0
CR45671	FBgn0267231	0	0	0	0	0
CG7368	FBgn0036179	3.90972	3.21751	3.67206	3.59976	0.203067
CG14137	FBgn0036178	0	0	0	0	0
CG6091	FBgn0036180	9.92168	10.3848	10.0504	10.119	0.138016
CG42832	FBgn0262021	0	0	0	0	0
Muc68Ca	FBgn0036181	0.00754524	0.00967344	0.00385413	0.00702427	0.00169997
CG6084	FBgn0086254	43.0716	47.5639	43.0019	44.5458	1.50918
CG6083	FBgn0036183	2.28764	1.49484	1.36324	1.71524	0.28871
PCID2	FBgn0036184	5.68976	5.33123	5.59993	5.54031	0.107707
CG18815	FBgn0042138	86.7493	84.4933	76.1382	82.4603	3.22742
CG12645	FBgn0030181	0.0454019	0	0.0944547	0.0466189	0.0272735
mir-3642	FBgn0263632	0	0	0	0	0
CG32091	FBgn0052091	15.2643	17.0729	20.7066	17.6813	1.60023
CR45158	FBgn0266651	0.347442	0.332818	0.353654	0.344638	0.00617607
CG6071	FBgn0036186	0.673642	0.509341	0.601866	0.59495	0.0475555
RIOK1	FBgn0036187	2.70415	2.44904	2.94055	2.69791	0.141921
CG7339	FBgn0036188	11.8091	9.11065	11.324	10.7479	0.830524
CG32085	FBgn0052085	9.26725	7.68618	7.8555	8.26964	0.501192
mir-274	FBgn0262437	0	0	0	0	0
CR45881	FBgn0267541	0	0.083977	0.0680061	0.050661	0.0257467
CR45880	FBgn0267540	0.187519	0	0	0.0625063	0.0625063
CG11638	FBgn0040351	2.9031	2.59132	3.2475	2.91397	0.189501
CG43902	FBgn0264503	14.1111	14.016	14.0245	14.0505	0.0303826
CR45883	FBgn0267543	0.335325	0	0	0.111775	0.111775
CR45882	FBgn0267542	0.535586	0.387511	0.628548	0.517215	0.0701851
CR45884	FBgn0267544	0.218529	0	0	0.072843	0.072843
TfIIEalpha	FBgn0015828	8.90013	7.90962	8.25167	8.35381	0.29046
Sugb	FBgn0036191	5.56762	5.76842	5.85464	5.73023	0.0850278
CR45885	FBgn0267545	3.03245	2.80941	2.65571	2.83252	0.109368
Pallidin	FBgn0036192	8.08226	8.06122	6.11616	7.41988	0.651888
CG14135	FBgn0036193	8.88325	9.62942	9.16528	9.22598	0.217529
CR43887	FBgn0264479	1.49224	0.898198	1.34858	1.24634	0.178943
CG11652	FBgn0036194	13.8538	14.1636	12.364	13.4605	0.55548
CR32690	FBgn0052690	0.0569127	0	0.0580631	0.0383253	0.0191655
Dnai2	FBgn0036195	7.83426	7.39151	7.73671	7.65416	0.13431
CG11658	FBgn0036196	18.2344	16.0066	17.3086	17.1832	0.64616
mtTFB1	FBgn0261381	44.5201	47.4982	46.3348	46.1177	0.866529
crim	FBgn0036198	29.1461	27.135	30.0284	28.7698	0.856178
CG14132	FBgn0040817	10.7284	12.0409	11.7998	11.523	0.403367
Bmcp	FBgn0036199	16.0219	18.5032	19.9291	18.1514	1.14155
sunn	FBgn0052088	0.01464	0	0.0150604	0.00990013	0.00495155
CG32087	FBgn0052087	0	0	0.0350036	0.0116679	0.0116679
CG6024	FBgn0036202	3.20156	2.70358	2.80469	2.90328	0.151971
CG15309	FBgn0030183	9.28734	10.681	10.5156	10.1613	0.439587
Gr68a	FBgn0041231	0	0.0534192	0.0434179	0.032279	0.0163957
Muc68D	FBgn0036203	0.0589901	0.0107776	0	0.0232559	0.018136
mir-314	FBgn0262396	0	0	0	0	0
mir-956	FBgn0262291	0	0	0	0	0
Tim13	FBgn0036204	0.435419	0.366068	0.148135	0.316541	0.0865501
Pi3K68D	FBgn0015278	7.07432	7.02459	6.93844	7.01245	0.0396921
CG14131	FBgn0036205	0.575214	0.399652	0.433261	0.469376	0.0538012
CG5964	FBgn0036206	3.21132	3.13905	3.58068	3.31035	0.136766
CG10907	FBgn0036207	4.46006	4.74355	4.41735	4.54032	0.10236
Klp68D	FBgn0004381	26.1333	26.2818	26.0409	26.152	0.0701676
CR43899	FBgn0264500	0.151171	0	0.614104	0.255092	0.184735
CG10361	FBgn0036208	0.841712	1.00511	1.08222	0.976347	0.0709025
tRNA:Gln-TTG-1-1	FBgn0052093	0	0	0	0	0
CG42255	FBgn0259140	0	0.00900409	0	0.00300136	0.00300136
CG14130	FBgn0036210	6.2074	6.50748	5.36337	6.02608	0.342493
CG5946	FBgn0036211	187.965	197.275	197.591	194.277	3.15732
CG11597	FBgn0036212	4.78301	4.07809	4.03979	4.3003	0.24161
RpL10Ab	FBgn0036213	550.306	637.612	588.118	592.012	25.2782
snoRNA:Psi18S-920	FBgn0083015	9.90568	0	0	3.30189	3.30189
CG32095	FBgn0052095	3.82358	3.37327	3.32378	3.50688	0.158995
CycA	FBgn0000404	0.388319	0.369049	0.351644	0.369671	0.0105917
ATPsyndelta	FBgn0028342	228.174	215.098	201.422	214.898	7.72328
CG7264	FBgn0036214	0.27937	0.346279	0.281709	0.302453	0.0219236
CG43064	FBgn0262366	0.110796	0	0	0.036932	0.036932
CG12521	FBgn0040816	0	0	0	0	0
CG44837	FBgn0266100	0.173796	0.153107	0.15877	0.161891	0.0061729
CG5906	FBgn0036217	0	0	0.125593	0.0418643	0.0418643
Sprn	FBgn0036218	0.0203615	0	0	0.00678717	0.00678717
CCDC151	FBgn0036219	2.89576	2.40369	2.47915	2.59287	0.153005
CG5897	FBgn0036220	0	0	0.027483	0.009161	0.009161
CR43624	FBgn0263615	0	0	0	0	0
CG11588	FBgn0036221	0	0	0	0	0
CG2962	FBgn0030186	0.528276	0.233256	0.347168	0.369567	0.0858981
SdhAL	FBgn0036222	0	0	0	0	0
byn	FBgn0011723	0	0	0	0	0
Rpt4R	FBgn0036224	0	0	0	0	0
CG5883	FBgn0036225	0	0	0	0	0
mir-285	FBgn0262401	0	0	0	0	0
CG7252	FBgn0036226	0	0	0	0	0
CG17826	FBgn0036227	0	0	0	0	0
obst-G	FBgn0036228	0	0	0	0	0
CG7248	FBgn0036229	0	0	0	0	0
CG11570	FBgn0036230	0	0	0	0	0
CR45629	FBgn0267189	0.101551	0	0.0520011	0.051184	0.0293181
CG43294	FBgn0262986	0	0	0	0	0
prc	FBgn0028573	0.0681546	0.0453963	0.00627808	0.039943	0.0180691
Muc68E	FBgn0053265	0.0543876	0	0	0.0181292	0.0181292
CG42397	FBgn0259748	7.14662	0	0	2.38221	2.38221
CG14125	FBgn0036232	0	0	0	0	0
CG43896	FBgn0264488	0.098857	0.00841771	0.0339099	0.0470615	0.026923
CG6938	FBgn0036235	21.3402	22.35	24.5795	22.7566	0.956946
CG6931	FBgn0036236	2.39458	2.54109	2.31368	2.41645	0.0665521
viaf	FBgn0036237	20.5621	23.3505	22.2194	22.044	0.809705
Grip163	FBgn0026432	1.49204	1.41292	1.28606	1.39701	0.0599913
CG15308	FBgn0040941	0	0	0	0	0
Pop2	FBgn0036239	79.9489	72.2753	70.3224	74.1822	2.93795
CG6928	FBgn0036240	8.07701	9.32467	9.24369	8.88179	0.403068
rols	FBgn0041096	2.06069	1.97494	2.13089	2.05551	0.0450934
CR43994	FBgn0264726	0	0	0	0	0
CG43993	FBgn0264725	0	0	0	0	0
CG6793	FBgn0036242	0.0858523	0.133321	0.087619	0.102264	0.0155368
CG43638	FBgn0263647	0	0.0736239	0	0.0245413	0.0245413
Sema5c	FBgn0284221	1.3149	1.24646	0.888416	1.14993	0.132239
CG17154	FBgn0036246	0	0	0	0	0
l(3)j2D3	FBgn0011335	7.5702	8.50636	7.89912	7.99189	0.274198
CG34408	FBgn0085437	28.1381	26.0238	27.244	27.1353	0.612761
ssp	FBgn0036248	7.14964	8.38083	7.47968	7.67005	0.367939
CG11560	FBgn0036249	6.95489	6.54891	5.97964	6.49448	0.282843
yps	FBgn0022959	60.1569	63.6328	62.9516	62.2471	1.06344
Ir68b	FBgn0036250	0.0262754	0	0	0.00875847	0.00875847
CG34241	FBgn0250825	0	0	0	0	0
CR11538	FBgn0017424	0.041933	0.155806	0.0216099	0.0731163	0.041759
Lsp2	FBgn0002565	0.0190894	0.261356	0.0195065	0.099984	0.0806861
CG11534	FBgn0046296	6.62804	6.49664	6.36441	6.49636	0.0761036
CR45892	FBgn0267552	4.55722	4.96209	4.89337	4.80423	0.125086
CG5645	FBgn0036254	1.94736	1.75135	1.66193	1.78688	0.0842899
Ipod	FBgn0030187	1.15812	1.24855	1.01353	1.14007	0.0684423
Atg12	FBgn0036255	27.0584	25.3327	25.3492	25.9134	0.572503
ND-SGDH	FBgn0011455	194.27	201.737	182.038	192.682	5.7418
RhoGAP68F	FBgn0036257	20.374	19.3325	19.7467	19.8177	0.302746
CG5642	FBgn0036258	56.6477	61.2628	58.1954	58.702	1.35613
Nrx-IV	FBgn0013997	12.9841	12.3392	12.7903	12.7045	0.191042
CG32099	FBgn0052099	3.00209	4.3389	3.68361	3.67487	0.385929
CG9760	FBgn0036259	1.40039	0.872291	1.19251	1.15506	0.153594
Rh7	FBgn0036260	0.249708	0.241592	0.307242	0.266181	0.0206639
CAH2	FBgn0027843	304.233	320.305	301.676	308.738	5.83041
CG6910	FBgn0036262	35.7972	47.0684	27.6351	36.8336	5.63379
CG32814	FBgn0052814	0	0	0	0	0
Hk	FBgn0263220	20.8499	15.197	18.0327	18.0265	1.63185
Est-6	FBgn0000592	513.335	563.911	479.813	519.02	24.4428
thoc6	FBgn0036263	7.35301	6.26818	7.11247	6.91122	0.328933
Est-P	FBgn0000594	3.32829	2.80475	3.19858	3.11054	0.157413
CR45746	FBgn0267310	0.402267	0.546977	0.811816	0.58702	0.11991
CG11529	FBgn0036264	4.1746	3.97039	8.02884	5.39128	1.3201
Adk1	FBgn0022709	367.372	408.258	406.824	394.151	13.3961
CG5626	FBgn0036266	1.23335	1.24778	1.23505	1.23873	0.00455319
app	FBgn0260941	16.5329	13.9514	14.8686	15.1176	0.755546
CR43991	FBgn0264723	0	0	0	0	0
CG32100	FBgn0052100	3.22906	3.37617	3.36587	3.3237	0.0474133
CR43959	FBgn0264674	3.44523	1.99012	3.01081	2.81539	0.431269
Pbgs	FBgn0036271	6.84084	7.76876	6.97993	7.19651	0.288929
CG4300	FBgn0036272	27.5575	24.6503	23.8901	25.366	1.11753
INPP5E	FBgn0036273	4.23012	4.91342	4.1995	4.44768	0.233038
CR46241	FBgn0267961	0	0	0	0	0
CR45658	FBgn0267218	0	0	0	0	0
CG4328	FBgn0036274	0.0410446	0.0254185	0	0.0221544	0.0119604
CR44550	FBgn0265743	0	0	0	0	0
CR44551	FBgn0265744	0	0	0	0	0
CG44355	FBgn0265455	0.049216	0	0	0.0164053	0.0164053
Lmx1a	FBgn0052105	0	0	0	0	0
CG12643	FBgn0040942	37.1238	38.9802	41.2696	39.1245	1.19896
CG10418	FBgn0036277	26.1757	23.6917	21.0697	23.6457	1.47415
CR45444	FBgn0266993	1.38125	1.81483	1.63636	1.61081	0.125814
CrzR	FBgn0036278	8.01635	5.58285	6.0511	6.5501	0.745482
Ncc69	FBgn0036279	34.8381	39.7676	41.9313	38.8457	2.09888
CR45824	FBgn0267474	0.099348	0.0847944	0	0.0613808	0.0309766
CG32104	FBgn0052104	8.4235	9.56256	10.5298	9.50529	0.60871
Obp69a	FBgn0011279	2632.82	3352.96	3091.43	3025.74	210.465
Smyd4-2	FBgn0036282	0.239435	0.0537395	0.134389	0.142521	0.0537597
CG32103	FBgn0052103	25.6355	25.4538	24.9239	25.3377	0.213461
ArfGAP1	FBgn0020655	15.1047	15.3893	15.0484	15.1808	0.105509
alpha-Man-Ia	FBgn0259170	12.7519	11.1236	13.2056	12.3604	0.632101
toe	FBgn0036285	19.7442	22.3825	21.4802	21.2023	0.774183
eyg	FBgn0000625	13.5971	12.5331	13.7325	13.2876	0.379253
CG32102	FBgn0052102	0.218811	0	0.33713	0.185314	0.0987517
CG10616	FBgn0036286	16.9514	16.6508	17.0877	16.8966	0.129061
CG10663	FBgn0036287	1.23844	0.868261	0.971385	1.02603	0.110299
CG33725	FBgn0053725	0.0931215	0.121607	0	0.0715762	0.0367206
CG10660	FBgn0036288	4.85239	4.96809	4.72601	4.84883	0.0699051
CR45681	FBgn0267241	2.30752	2.85593	2.26041	2.47462	0.191139
CG10657	FBgn0036289	18.1402	16.5345	17.6772	17.4506	0.477168
CR45682	FBgn0267242	13.1846	12.8342	13.7571	13.2586	0.268978
CG2909	FBgn0030189	4.27728	4.72437	4.03479	4.34548	0.201964
CG10638	FBgn0036290	93.3601	106.669	108.198	102.742	4.71185
CR43868	FBgn0264460	7.45017	7.56058	7.33273	7.44783	0.0657851
CG10681	FBgn0036291	8.49584	6.07067	5.90837	6.82496	0.836753
CG10646	FBgn0036292	7.40867	7.30479	7.76998	7.49448	0.140976
vih	FBgn0264848	12.1171	12.6074	11.2981	12.0075	0.381912
CG10654	FBgn0036294	5.88407	5.33822	6.27907	5.83379	0.272761
sti	FBgn0002466	0.101043	0.0631622	0.0582702	0.0741585	0.0135162
CR45168	FBgn0266678	0	0	0	0	0
tral	FBgn0041775	20.8248	20.9465	19.9814	20.5842	0.303457
Gcn5	FBgn0020388	11.4813	11.2978	11.054	11.2777	0.12376
Gip	FBgn0011770	11.6139	14.5795	11.062	12.4185	1.0922
ver	FBgn0262524	8.3445	10.1524	6.81337	8.43676	0.964998
eIF-2beta	FBgn0004926	49.2961	43.7915	47.9872	47.0249	1.66028
nst	FBgn0036298	3.55316	3.6858	3.91928	3.71941	0.107018
Tsf2	FBgn0036299	16.9712	18.7744	17.2823	17.676	0.556511
CG34242	FBgn0085271	19.3665	24.8017	21.1356	21.7679	1.60055
Pmm2	FBgn0036300	12.8437	13.5868	13.7264	13.3856	0.273947
CG4069	FBgn0036301	2.40814	2.86583	2.896	2.72332	0.157832
sowah	FBgn0036302	7.8193	8.84948	8.30391	8.32423	0.297561
CR43612	FBgn0263587	0.460672	0.175445	0.0877425	0.241286	0.112577
ara	FBgn0015904	0.38817	0.0530989	0.117149	0.186139	0.102694
CG15306	FBgn0030191	0	0	0	0	0
caup	FBgn0015919	0.256298	0.0341898	0.0747456	0.121744	0.0682878
CR32111	FBgn0052111	0.237747	0.116112	0.14465	0.16617	0.0367246
CR43431	FBgn0263379	0	0.0231723	0.018662	0.0139448	0.00709291
CR44553	FBgn0265746	0	0	0	0	0
CR44552	FBgn0265745	0	0	0	0	0
mirr	FBgn0014343	0.539677	0.511053	0.363444	0.471391	0.0546025
SmD1	FBgn0261933	5.24928	7.32393	7.11854	6.56392	0.659987
Ptp69D	FBgn0014007	3.04568	3.34032	3.24357	3.20986	0.0867095
CG32112	FBgn0052112	11.4063	10.6919	10.483	10.8604	0.279532
CG32109	FBgn0052109	15.3156	17.8754	15.1158	16.1023	0.888441
CG43740	FBgn0263997	1.76817	1.07431	1.10804	1.31684	0.225875
Klc	FBgn0010235	32.4336	33.8613	33.8452	33.38	0.473239
CG10984	FBgn0036305	9.77672	8.79632	8.4801	9.01771	0.390328
CG10973	FBgn0036306	14.8195	15.8284	17.3122	15.9867	0.72392
CG32113	FBgn0052113	1.74969	1.47976	1.53139	1.58695	0.0827254
Hip1	FBgn0036309	3.67976	4.0527	3.80559	3.84602	0.10954
CG32106	FBgn0052106	0	0	0	0	0
CG10969	FBgn0036310	0	0	0	0	0
CG17666	FBgn0036311	0.0479209	0	0.0155839	0.0211683	0.0141125
Atg1	FBgn0260945	9.23651	8.82742	8.63253	8.89882	0.177971
CG42709	FBgn0261674	12.8461	14.1388	12.7444	13.2431	0.448811
snoRNA:U3:9B	FBgn0065046	0	0	0	0	0
Sap130	FBgn0262714	8.19419	8.08004	7.87583	8.05002	0.0931203
CR46251	FBgn0267984	2.82904	3.8235	3.06766	3.24007	0.299739
CG32110	FBgn0052110	0.092688	0.0389865	0.094825	0.0754998	0.0182671
CG10754	FBgn0036314	12.2615	13.6473	14.4692	13.4593	0.644201
CG42588	FBgn0260965	1.1695	0.965725	1.05028	1.06184	0.0591078
CG10960	FBgn0036316	23.4883	26.0226	26.6236	25.3782	0.960728
CG10948	FBgn0036317	7.97413	7.52441	7.99791	7.83215	0.154023
Wbp2	FBgn0036318	120.644	124.003	124.469	123.039	1.20487
Ent3	FBgn0036319	7.63944	7.13866	7.68384	7.48731	0.174797
CG32107	FBgn0052107	0.321077	0.278245	0.441264	0.346862	0.0487936
l(1)G0289	FBgn0028331	23.0832	20.6013	21.4192	21.7012	0.730209
CG10943	FBgn0036320	0.176554	0.0391041	0	0.071886	0.0535376
CG14120	FBgn0036321	0.116423	0	0	0.0388077	0.0388077
CR45748	FBgn0267312	0	0	0	0	0
CG43894	FBgn0264486	0	0	0	0	0
CG14118	FBgn0036323	0.0834155	0	0	0.0278052	0.0278052
CG12520	FBgn0036324	0.500891	0.982841	0.619248	0.700993	0.145007
CG32117	FBgn0052117	0	0	0	0	0
CG32115	FBgn0052115	0.107748	0.0698042	0.0275144	0.0683555	0.0231728
CG10752	FBgn0036325	0	0	0	0	0
Or69a	FBgn0041622	12.607	14.8766	13.9728	13.8188	0.659686
CG3021	FBgn0040337	7.15023	7.23915	7.06067	7.15002	0.0515228
CG32679	FBgn0052679	0.118017	0.0739082	0	0.0639751	0.0344287
CG10748	FBgn0036327	0	0	0	0	0
CG10749	FBgn0036328	0	0	0	0	0
CG11262	FBgn0036329	0	0	0	0	0
CG11263	FBgn0036330	0	0	0.0473465	0.0157822	0.0157822
CG14117	FBgn0036331	3.60613	3.67308	4.04499	3.77473	0.136503
CG11261	FBgn0036332	0.490595	0.696183	0.725545	0.637441	0.0739106
MICAL-like	FBgn0036333	6.00496	6.21291	5.64396	5.95394	0.166211
CG11267	FBgn0036334	75.9891	78.7957	80.5682	78.451	1.33306
mRpL20	FBgn0036335	17.7308	19.9395	17.0785	18.2496	0.865678
ste14	FBgn0036336	3.74863	3.16141	4.1747	3.69491	0.293742
CG17841	FBgn0028480	34.5022	34.6878	31.3383	33.5094	1.08689
CR45445	FBgn0266994	1.59686	1.77629	1.87058	1.74791	0.0802802
AdenoK	FBgn0036337	17.4047	19.5811	19.897	18.9609	0.783442
RpS12	FBgn0286213	594.511	666.11	627.118	629.246	20.6962
snoRNA:Me28S-A774b	FBgn0086078	0	0	0	0	0
snoRNA:Me28S-A774a	FBgn0086079	0	0	0	0	0
Zmynd10	FBgn0266709	3.11339	3.6806	3.19254	3.32884	0.177356
CR45172	FBgn0266682	0.164963	0	0	0.0549877	0.0549877
CG17672	FBgn0083978	0.329583	0.337947	0.306618	0.324716	0.00936558
CR45157	FBgn0266650	0	0	0	0	0
SRm160	FBgn0036340	7.53546	6.28288	7.45455	7.09096	0.404716
CG32686	FBgn0052686	0.0338572	0.0422309	0.0345442	0.0368774	0.00268407
RpS4	FBgn0011284	461.912	493.048	471.555	475.505	9.20262
snoRNA:Psi28S-3327a	FBgn0082967	4.49932	0	0	1.49977	1.49977
snoRNA:Psi28S-3327b	FBgn0082966	0	0	0	0	0
snoRNA:Psi28S-3327c	FBgn0086601	3.88292	0	0	1.29431	1.29431
Syx13	FBgn0036341	13.2796	12.1598	13.3373	12.9256	0.383245
CG11279	FBgn0036342	19.1422	25.9473	23.5843	22.8913	1.99479
CG14115	FBgn0036343	0	0	0	0	0
CG34428	FBgn0085457	0	0	0	0	0
CG34429	FBgn0085458	0	0	0	0	0
CR43652	FBgn0263661	0	0	0	0	0
CG2898	FBgn0030195	0	0.0493373	0.0410456	0.0301276	0.0152528
CG17300	FBgn0036345	0	0	0	0	0
CR45749	FBgn0267313	0	0	0	0	0
CG11251	FBgn0036346	0	0	0	0	0
CR44554	FBgn0265747	0	0	0	0	0
trn	FBgn0010452	2.59732	2.53665	2.48073	2.53823	0.0336659
CG33262	FBgn0053262	0.0803644	0	0	0.0267881	0.0267881
snky	FBgn0086916	0	0	0	0	0
CR45096	FBgn0266535	0	0	0	0	0
tRNA:Pro-AGG-1-5	FBgn0052129	0	0	0	0	0
tRNA:Pro-AGG-1-6	FBgn0052128	0	0	0	0	0
CG32681	FBgn0052681	0.0245379	0.0203576	0.00835331	0.0177496	0.00485065
tRNA:Pro-AGG-1-7	FBgn0052126	0	0	0	0	0
tRNA:Leu-CAA-2-2	FBgn0052127	0	0	0	0	0
CR45097	FBgn0266536	0	0	0	0	0
CR43914	FBgn0264515	0	0	0	0	0
CR45098	FBgn0266537	0	0	0	0	0
caps	FBgn0023095	5.52382	5.13205	4.46711	5.04099	0.308425
CG32119	FBgn0052119	0	0	0.0248264	0.00827547	0.00827547
tRNA:Asp-GTC-1-10	FBgn0011844	0	0	0	0	0
tRNA:CR32123:Psi	FBgn0052123	0	0	0	0	0
CR43146	FBgn0262622	0.0489623	0	0.0501141	0.0330255	0.0165161
Psf3	FBgn0030196	23.3168	24.2295	21.9871	23.1778	0.651045
CR43913	FBgn0264514	0	0	0	0	0
CR45752	FBgn0267316	0	0	0	0	0
CR45753	FBgn0267317	0	0	0	0	0
CR43912	FBgn0264513	0.0457374	0	0.0102972	0.0186782	0.0138523
Sfp70A4	FBgn0259970	0	0	0	0	0
CR45253	FBgn0266788	0	0	0	0	0
CR45255	FBgn0266790	0	0	0	0	0
CR45254	FBgn0266789	0	0	0	0	0
CG42481	FBgn0259971	2.92373	0	0	0.974577	0.974577
CG43147	FBgn0262623	0.451898	0.616339	0	0.356079	0.184259
flw	FBgn0000711	12.5281	11.8818	11.4019	11.9373	0.326287
SP	FBgn0003034	1.41803	0	0	0.472677	0.472677
CR43911	FBgn0264512	0	0	0	0	0
CR44557	FBgn0265750	0	0	0	0	0
CR44555	FBgn0265748	0	0	0	0	0
CR44558	FBgn0265751	0	0	0	0	0
CG14113	FBgn0040814	0	0	0	0	0
CR44559	FBgn0265752	0	0	0	0	0
CG17687	FBgn0036348	0.64944	0.494936	0.562116	0.568831	0.0447276
Nplp2	FBgn0040813	48.5719	106.157	16.7677	57.1655	26.1598
CG14111	FBgn0036350	0	0	0	0	0
CG32683	FBgn0052683	2.94516	2.25051	2.39744	2.53104	0.211361
SNCF	FBgn0036349	0.171009	0.110694	0	0.093901	0.050075
CR45886	FBgn0267546	0	0	0	0	0
CG14107	FBgn0036351	0.0450226	0.113006	0	0.0526762	0.0328457
ImpL1	FBgn0001256	0.229199	0.0476296	0.195169	0.157333	0.0557242
CG14110	FBgn0036352	0	0	0.0808552	0.0269517	0.0269517
CG10171	FBgn0036353	5.05558	5.96869	6.30217	5.77548	0.372601
Poc1	FBgn0036354	1.05697	1.37657	0.928427	1.12066	0.133229
sens	FBgn0002573	0.0162989	0.0405177	0.0166185	0.0244784	0.0080202
CG10222	FBgn0036356	4.55474	3.83933	3.6475	4.01386	0.276053
flr	FBgn0260049	10.4088	8.86568	9.51554	9.59667	0.447304
RabX2	FBgn0030200	0	0	0	0	0
CG32121	FBgn0052121	0.643628	0.153873	0.26745	0.354984	0.148
CG33263	FBgn0053263	0	0	0	0	0
CG14106	FBgn0260459	0.0414497	0	0.0423447	0.0279315	0.0139681
CG14105	FBgn0036359	13.6874	11.3962	9.81961	11.6344	1.12287
CG10713	FBgn0036360	1.73775	1.32571	2.13024	1.73123	0.232271
tRNA:Val-AAC-2-3	FBgn0012010	0	0	0	0	0
tRNA:Val-AAC-2-4	FBgn0012009	0	0	0	0	0
CG10154	FBgn0036361	0	0	0	0	0
CG10725	FBgn0036362	0	0	0	0	0
CG10140	FBgn0036363	0.0490401	0	0	0.0163467	0.0163467
CG12640	FBgn0030202	0	0	0	0	0
CG14109	FBgn0036364	11.6692	3.73181	5.48391	6.96164	2.40751
cmb	FBgn0036365	4.9088	3.18435	3.37109	3.82141	0.546359
CG10133	FBgn0036366	7.03515	6.70113	6.19094	6.64241	0.245465
CG10738	FBgn0036368	1.23235	1.38567	1.5623	1.39344	0.0953276
CG10116	FBgn0036367	2.83086	3.58926	3.38205	3.26739	0.226313
CG10089	FBgn0036369	8.00909	6.94433	8.3636	7.77234	0.426466
stv	FBgn0086708	26.4614	23.5193	24.9499	24.9769	0.849418
Abp1	FBgn0036372	6.77005	7.36595	7.484	7.20667	0.220952
Tgi	FBgn0036373	7.24457	7.10913	6.86561	7.0731	0.110869
Spt20	FBgn0036374	1.98245	1.64438	1.78263	1.80315	0.0981304
CDC45L	FBgn0026143	3.95784	3.34498	3.55349	3.61877	0.179903
snoRNA:Me28S-A1705	FBgn0086046	0	0	0	0	0
Vps36	FBgn0086785	10.92	12.2153	10.4504	11.1952	0.527741
Liprin-beta	FBgn0036376	10.6684	10.1459	10.4397	10.418	0.151222
CG10710	FBgn0036377	0.385092	0.294161	0.211828	0.297027	0.0500375
bru3	FBgn0264001	1.56468	1.27269	1.45695	1.43144	0.0852498
[truncated: 15,616 more rows]

## Sheet: antennal enriched genes
Symbol	FBgn ID	Antennal FPKM	AdF_Ecl_5days	AdM_Ecl_5days	em22-24hr	L1	L3_PS7-9	P15	P5		A_4d_dig_sys	A_MateF_4d_head	A_MateM_4d_head	L3_CNS	L3_Wand_dig_sys	L3_Wand_fat	L3_Wand_saliv	P8_CNS	P8_fat	WPP_saliv
a10	FBgn0011293	13647.6	6	25	1	0	0	45	0		0	2	6	1	0	0	0	0	0	0
a5	FBgn0011294	2995.23	1	4	0	0	0	2	0		0	0	2	0	0	0	0	0	0	0
Adat1	FBgn0028658	142.856	1	1	1	2	2	1	2		0	1	1	2	0	0	0	2	1	1
Amt	FBgn0038309	208.634	0	2	0	0	0	3	0		0	0	0	0	0	0	0	0	0	0
antdh	FBgn0026268	2953.72	16	40	7	9	4	52	1		0	5	9	0	0	0	0	0	0	0
AOX4	FBgn0038350	51.7903	0	1	0	0	0	0	0		0	0	0	0	0	0	0	0	0	0
Arl6	FBgn0034446	67.2124	0	1	1	1	0	1	1		0	0	1	0	0	0	0	0	0	0
BBS4	FBgn0033578	43.5487	0	1	1	0	0	1	1		0	0	1	0	0	0	0	0	0	0
BBS5	FBgn0037280	38.5345	0	1	1	1	0	1	0		0	0	0	0	0	0	0	0	0	0
BBS9	FBgn0034622	37.2562	0	1	1	1	0	0	0		0	0	1	0	0	0	0	0	0	0
CCKLR-17D1	FBgn0259231	33.3027	0	1	1	2	0	1	0		0	1	1	1	0	0	0	3	0	0
CG10050	FBgn0037492	277.6	7	1	2	7	3	2	2		1	1	1	2	0	0	0	2	1	0
CG10185	FBgn0038397	43.7209	0	4	1	0	0	1	0		0	0	1	0	0	0	0	0	0	0
CG10357	FBgn0035453	204.147	0	1	0	0	0	1	0		0	0	1	0	0	0	0	0	0	0
CG11041	FBgn0034481	32.0251	0	1	2	1	0	0	0		0	0	0	0	0	0	0	0	0	0
CG11391	FBgn0038732	1071.52	1	4	0	0	0	5	0		0	1	2	0	0	0	0	0	0	0
CG11550	FBgn0039864	657.073	3	7	0	0	7	2	5		12	11	19	1	0	0	0	9	39	0
CG12483	FBgn0040688	96.1588	1	5	1	0	0	7	0		1	0	0	0	0	0	0	0	0	0
CG12836	FBgn0033140	18.7247	0	0	0	1	0	0	0		0	0	0	0	0	0	0	1	0	0
CG12885	FBgn0039523	22.4672	0	0	1	1	0	0	0		0	0	1	0	0	0	0	1	0	0
CG13133	FBgn0032181	187.589	1	8	12	17	1	14	0		0	1	1	0	0	0	0	1	4	0
CG13251	FBgn0037014	12.0519	0	0	1	1	0	0	0		0	0	0	0	0	0	0	0	0	0
CG13332	FBgn0033851	14.573	0	0	1	1	0	0	1		0	0	0	0	0	0	0	0	0	0
CG13578	FBgn0035000	152.222	0	2	1	1	1	1	0		0	1	1	0	0	0	0	2	0	0
CG13692	FBgn0031254	20.7683	0	1	1	1	1	0	0		0	0	0	0	0	0	0	0	0	0
CG13869	FBgn0034486	14.9675	0	1	0	0	0	0	0		0	0	0	0	0	0	0	0	0	0
CG13950	FBgn0031289	77.285	1	4	2	3	2	5	0		1	0	1	0	0	0	6	0	0	7
CG14142	FBgn0036143	92.0426	0	2	0	0	0	2	0		0	0	0	0	0	0	0	0	0	0
CG14313	FBgn0038579	25.5597	0	1	0	0	0	1	0		0	0	0	0	0	0	0	0	0	0
CG14367	FBgn0038170	116.633	1	4	2	1	1	1	1		0	1	2	1	0	0	0	1	0	0
CG14661	FBgn0037288	2724.82	48	54	5	10	1	17	26		14	57	123	0	0	0	0	0	0	2
CG14692	FBgn0037836	20.4558	0	0	0	0	0	0	0		0	0	0	0	0	0	0	0	0	0
CG15661	FBgn0034605	146.799	2	3	4	3	0	1	0		6	13	10	0	0	0	0	0	0	0
CG15923	FBgn0038814	10.7183	0	1	1	1	0	1	1		0	0	0	0	0	0	0	1	0	0
CG17279	FBgn0038850	144.517	1	3	0	0	0	4	0		0	0	0	0	0	0	0	0	0	0
CG30259	FBgn0050259	67.495	0	0	0	0	0	0	0		0	0	0	0	0	0	0	0	0	0
CG30274	FBgn0050274	46.7709	0	0	2	1	0	0	0		0	0	0	0	0	0	0	1	0	0
CG30285	FBgn0050285	233.798	7	22	4	3	1	12	1		2	5	7	1	1	0	0	3	0	0
CG31809	FBgn0051809	78.8637	0	0	1	0	0	0	0		0	1	1	0	0	0	0	0	0	0
CG32006	FBgn0052006	38.2016	0	2	1	0	1	1	2		0	0	1	0	0	0	0	1	0	0
CG32271	FBgn0052271	93.8611	1	5	0	0	0	4	0		0	0	1	0	0	0	0	0	0	0
CG32668	FBgn0052668	17.2336	0	1	1	1	0	0	1		0	0	0	0	0	0	0	0	0	0
CG33159	FBgn0053159	79.1494	0	0	0	0	0	1	0		0	0	0	0	0	0	0	0	0	0
CG33177	FBgn0053177	176.133	1	1	3	3	0	2	0		0	0	0	0	0	0	0	0	0	0
CG33178	FBgn0053178	339.075	1	2	6	4	1	3	0		1	6	10	0	0	0	0	0	0	0
CG34180	FBgn0085209	40.0707	1	4	1	1	0	4	0		0	1	1	0	0	0	0	0	0	0
CG34309	FBgn0259831	189.96	0	1	2	1	0	1	0		0	0	1	0	0	0	0	0	0	0
CG34342	FBgn0085371	76.4917	0	0	1	0	0	1	0		0	0	0	0	0	0	0	0	0	0
CG3769	FBgn0032119	13.7923	0	1	1	0	0	0	0		0	0	0	0	0	0	0	0	0	0
CG40486	FBgn0263830	994.131	11	39	5	3	5	6	11		10	5	9	0	2	1	0	0	6	0
CG42246	FBgn0259098	45.6215	2	3	3	1	4	3	0		1	1	2	0	1	0	2	0	0	1
CG42284	FBgn0259179	150.777	0	1	2	1	0	1	0		0	0	0	0	0	0	0	0	0	0
CG42366	FBgn0259712	11.6893	0	0	0	0	0	0	0		0	0	0	0	0	0	0	0	1	0
CG42649	FBgn0261501	38.5439	0	0	0	0	0	0	0		0	0	0	0	0	0	0	0	0	0
CG43094	FBgn0262540	139.581	0	0	0	0	0	0	0		0	1	1	0	0	0	0	0	0	0
CG43095	FBgn0262541	10.8189	0	0	0	0	0	0	0		0	0	0	0	0	0	0	0	0	0
CG43220	FBgn0262856	604.192	0	0	1	0	0	0	0		0	0	0	0	0	0	0	0	0	0
CG43645	FBgn0263654	87.583	0	0	1	0	0	0	0		0	0	0	1	0	0	0	0	0	0
CG43646	FBgn0263655	16.7694	0	1	1	0	0	0	0		0	0	1	0	0	0	0	0	0	0
CG43647	FBgn0263656	22.5043	0	1	1	0	0	0	1		0	0	0	1	0	0	0	0	0	0
CG5948	FBgn0039386	108.088	0	1	0	1	0	2	0		0	1	2	0	0	0	0	0	0	0
CG6362	FBgn0028740	26.143	0	1	2	0	0	1	0		0	0	1	0	0	0	0	1	0	0
CG6938	FBgn0036235	22.7566	0	0	1	1	0	0	0		0	0	0	0	0	0	0	0	0	0
CG7236	FBgn0031730	66.4729	0	1	2	1	0	2	0		0	0	1	0	0	0	0	1	4	0
CG7568	FBgn0039673	24.5281	0	1	1	0	0	0	0		0	0	0	0	0	0	0	0	0	0
CG8369	FBgn0040532	6966.32	27	117	15	36	85	76	48		3	45	115	10	9	319	5	42	34	3
CG9447	FBgn0033110	17.5896	0	0	0	0	0	1	0		0	0	0	0	0	1	0	0	0	0
CG9497	FBgn0031800	2031.4	3	16	2	2	3	28	1		2	8	17	0	0	0	0	0	0	2
CG9541	FBgn0032083	95.7077	0	2	1	0	0	3	0		0	0	1	0	0	0	0	1	0	0
Cyp308a1	FBgn0030949	178.44	0	1	0	0	0	1	0		0	0	0	0	0	0	0	0	0	0
Cyp6a2	FBgn0000473	608.05	2	11	16	14	1	6	1		3	6	10	0	0	0	0	0	0	0
Cyp6g2	FBgn0033696	115.146	1	6	3	3	2	1	1		1	0	0	4	0	1	0	0	0	0
Cyp6t3	FBgn0033697	89.072	0	1	0	0	1	0	1		0	0	0	0	0	0	0	0	0	0
Drsl5	FBgn0035434	10249.5	53	245	0	0	699	37	176		2	89	231	6	6	27	4	1	404	76
eIF4B	FBgn0020660	14.239	0	0	0	0	0	0	0		0	1	1	1	0	0	0	1	0	1
Gr10a	FBgn0045502	23.1119	0	1	0	0	0	1	0		0	0	0	0	0	0	0	0	0	0
Gr21a	FBgn0041250	11.0588	0	0	0	0	0	0	0		0	0	0	0	0	0	0	0	0	0
Gr64f	FBgn0052255	30.7368	0	1	0	0	0	0	0		0	0	0	0	0	0	0	0	0	0
GstD11	FBgn0038029	179.183	0	3	2	2	0	2	0		1	0	0	0	0	0	0	0	0	0
GstD8	FBgn0010044	185.39	1	2	11	10	1	1	0		4	0	0	0	1	0	0	0	0	0
GstE4	FBgn0063496	2287.47	2	7	16	15	0	18	0		0	0	0	0	0	0	0	0	0	0
IFT20	FBgn0050441	35.2187	0	0	1	0	0	0	0		0	0	0	0	0	0	0	0	0	0
IFT46	FBgn0032692	20.2269	0	0	0	0	0	0	0		0	0	0	0	0	0	0	0	0	0
IFT52	FBgn0031829	31.1334	0	2	1	0	0	1	1		0	0	0	0	0	0	0	0	0	0
Ir25a	FBgn0031634	48.7219	0	1	2	1	0	1	0		1	1	2	0	0	0	0	1	0	0
Ir31a	FBgn0051718	10.7177	0	0	0	0	0	0	0		0	0	0	0	0	0	0	0	0	0
Ir64a	FBgn0035604	17.2513	0	0	0	0	0	0	0		0	0	0	0	0	0	0	0	0	0
Ir75a	FBgn0036757	44.4316	0	1	0	0	0	0	0		0	1	2	0	0	0	0	0	0	0
Ir75d	FBgn0036829	30.148	0	0	0	0	0	0	0		0	0	0	0	0	0	0	0	0	0
Ir76b	FBgn0036937	69.5461	0	1	2	2	0	1	0		0	1	2	0	0	0	0	0	0	0
Ir8a	FBgn0052704	25.2048	0	0	0	0	0	0	0		0	0	0	0	0	0	0	0	0	0
Jhedup	FBgn0034076	2262.66	2	7	0	0	0	14	0		0	0	1	0	1	0	0	0	0	0
Klp54D	FBgn0263076	17.5642	0	0	1	1	1	0	0		0	0	1	1	0	0	0	0	0	0
Kua	FBgn0032850	80.3239	0	3	2	1	1	2	1		4	0	0	1	3	0	0	1	0	0
lms	FBgn0034520	11.5301	0	1	0	1	1	1	1		0	0	0	0	0	0	0	0	0	0
lush	FBgn0020277	1718.48	1	4	0	0	0	7	1		0	0	0	0	0	0	0	0	0	0
Naam	FBgn0051216	133.823	4	6	6	5	1	4	1		2	1	2	1	0	0	0	1	0	1
Obp19a	FBgn0031109	2996.84	3	9	0	0	0	7	0		0	0	1	0	0	0	0	0	0	0
Obp19d	FBgn0011280	30846.6	50	204	0	0	0	123	0		1	541	1175	0	1	0	0	1	3	1
Obp28a	FBgn0011283	5444.05	4	13	117	99	12	64	0		0	3	5	6	1	0	0	1	2	0
Obp59a	FBgn0034766	1260.96	1	3	0	0	0	7	2		0	1	1	0	0	0	0	0	0	0
Obp69a	FBgn0011279	3025.74	1	3	0	0	0	3	0		0	2	5	1	1	0	1	0	0	0
Obp83a	FBgn0011281	15112.9	4	27	0	0	0	22	0		0	1	4	0	1	0	0	0	0	0
Obp83b	FBgn0010403	17591.1	4	19	0	0	1	8	0		0	1	4	0	1	0	0	0	0	0
Obp84a	FBgn0011282	2155.97	0	0	1	0	1	0	1		0	1	2	0	0	0	0	0	3	0
Or13a	FBgn0030715	13.3397	0	0	0	0	0	0	0		0	0	0	0	0	0	0	0	0	0
Or19b	FBgn0062565	15.8004	0	0	0	0	0	0	0		0	0	0	0	0	0	0	0	0	0
Or22a	FBgn0026398	36.1255	0	0	0	0	0	0	0		0	0	0	0	0	0	0	0	0	0
Or22b	FBgn0026397	24.6287	0	0	0	0	0	0	0		0	0	0	0	0	0	0	0	0	0
Or23a	FBgn0026395	11.1107	0	1	0	0	0	0	1		0	0	0	0	0	0	0	0	0	0
Or35a	FBgn0028946	18.4399	0	0	0	0	0	0	0		0	0	0	0	1	0	0	0	0	0
Or42b	FBgn0033043	76.0108	0	0	0	0	0	1	0		0	0	0	0	0	0	0	0	0	0
Or43a	FBgn0026389	20.9253	0	0	0	0	0	0	0		0	0	0	0	0	0	0	0	0	0
Or47a	FBgn0026386	45.1357	0	0	0	0	0	0	0		0	0	0	0	0	0	0	0	0	0
Or47b	FBgn0026385	86.2339	0	0	0	0	0	0	0		0	0	0	0	0	0	0	0	0	0
Or56a	FBgn0034473	20.8081	0	0	0	0	0	0	0		0	0	0	0	0	0	0	0	0	0
Or59b	FBgn0034865	82.4697	0	2	0	0	0	1	0		0	0	0	0	0	0	0	0	0	0
Or65a	FBgn0041625	28.4095	0	0	0	0	0	0	0		0	0	0	0	0	0	0	0	0	0
Or65b	FBgn0041624	31.8724	0	0	0	0	0	0	0		0	0	0	0	0	0	0	0	0	0
Or65c	FBgn0041623	10.3585	0	0	0	0	0	0	0		0	0	0	0	0	0	0	0	0	0
Or67a	FBgn0036009	13.8178	0	0	0	0	0	0	0		0	0	0	0	0	0	0	0	0	0
Or67c	FBgn0036078	12.8353	0	0	0	0	0	0	0		0	0	0	0	0	0	0	0	0	0
Or67d	FBgn0036080	40.6011	0	0	0	0	0	0	0		0	0	0	0	0	0	0	0	0	0
Or69a	FBgn0041622	13.8188	0	0	0	0	0	0	0		0	0	0	0	0	0	0	0	0	0
Or7a	FBgn0030016	23.0373	0	0	0	0	0	0	1		0	0	0	0	0	0	0	0	0	0
Or85a	FBgn0037576	16.5611	0	0	0	0	0	0	0		0	0	0	0	0	0	0	0	0	0
Or85b	FBgn0037590	20.7144	0	0	0	0	0	0	0		0	0	0	0	0	0	0	0	0	0
Or92a	FBgn0038798	84.9792	0	0	0	0	0	0	0		0	0	0	0	0	0	0	0	0	0
Or98a	FBgn0039551	39.0143	0	0	0	0	0	0	0		0	0	0	0	0	0	0	0	0	0
Or9a	FBgn0030204	34.9198	0	0	0	0	0	0	0		0	0	0	0	0	0	0	0	0	0
Orco	FBgn0037324	894.298	1	6	2	2	0	6	0		0	0	1	0	0	1	0	0	0	0
Os-C	FBgn0010401	12694.3	5	22	0	0	2	25	1		0	1	3	0	1	0	0	0	0	0
OS9	FBgn0042129	5104.43	7	19	0	0	0	7	1		0	3	6	0	0	0	1	0	0	6
OSCP1	FBgn0033685	96.5621	2	2	2	1	1	2	1		0	0	0	0	0	0	0	0	0	0
ppk25	FBgn0053349	27.8521	0	0	0	0	0	0	0		0	1	1	0	0	0	0	0	0	0
Snmp1	FBgn0260004	294.261	2	6	0	0	1	5	0		6	4	8	0	3	0	1	0	0	0
ss	FBgn0003513	34.5712	0	1	1	1	2	2	3		0	0	1	1	0	0	0	0	1	0
to	FBgn0039298	1553.92	9	107	0	1	0	1	1		28	18	14	0	0	0	0	0	0	0
Tsp47F	FBgn0033629	137.503	0	1	8	5	0	1	0		0	0	1	0	0	0	0	7	8	0
Ttc26	FBgn0038358	21.2026	0	0	1	0	0	0	0		0	0	0	0	0	0	0	0	0	0
Ugt35b	FBgn0026314	674.304	10	48	0	0	0	9	0		21	9	15	0	0	0	0	1	0	0
